# Supplementary material for: Newly developed reversible MAO-B inhibitor circumvents the shortcomings of irreversible inhibitors in Alzheimer’s disease
Source: PubMed Central journal article supplement — Sci Adv. 2019 Mar 20;5(3):eaav0316. doi: 10.1126/sciadv.aav0316 (PMC6426469; doi:10.1126/sciadv.aav0316), 2019-03-20

## Supplementary Materials for

### Newly developed reversible MAO-B inhibitor circumvents the shortcomings of irreversible inhibitors in Alzheimer's disease

Jong-Hyun Park, Yeon Ha Ju, Ji Won Choi, Hyo Jung Song, Bo Ko Jang, Junsung Woo, Heejung Chun, Hyeon Jeong Kim, Su Jeong Shin, Oleg Yarishkin, Seonmi Jo, Mijeong Park, Seul Ki Yeon, Siwon Kim, Jeongyeon Kim, Min-Ho Nam, Ashwini M. Londhe, Jina Kim, Sung Jin Cho, Suengmok Cho, Changho Lee, Sung Yeoun Hwang, Sang Wook Kim, Soo-Jin Oh, Jaiwon Cho, Ae Nim Pae, C. Justin Lee\*, Ki Duk Park\*

\*Corresponding author. Email: [cjl@kist.re.kr](mailto:cjl@kist.re.kr) (C.J.L.); [kdpark@kist.re.kr](mailto:kdpark@kist.re.kr) (K.D.P.)

Published 20 March 2019, *Sci. Adv.* **5**, eaav0316 (2018)  
DOI: 10.1126/sciadv.aav0316

#### This PDF file includes:

Supplementary Results

Supplementary Materials and Methods

Fig. S1. General procedure for the preparation of KDS compounds.

Fig. S2. Structure-activity relationship of the synthesized compounds.

Fig. S3. The KINOMEScan screening results with 1000 nM KDS2010 for off-target selectivity.

Fig. S4. Mode of KDS2010 binding with MAO-B.

Fig. S5. Three-day and 2-day interactions of selegiline, KDS2010, and KDS0014 inside MAO-B.

Fig. S6. Acute treatment of KDS2010 (3 days) restored memory impairment in APP/PS1 mice.

Fig. S7. Passive avoidance test for learning and memory in APP/PS1 mice with 2-week KDS2010 treatment.

Fig. S8. KDS2010 significantly recovers spatial learning and memory in Morris water maze.

Fig. S9. Model diagrams of long-term treatment of AD with either irreversible or reversible MAO-B inhibitors.

Fig. S10. Data distribution of bar graphs.

Table S1. Inhibitory effects of the synthesized compounds against hMAO enzymes.

Table S2. In vitro and in vivo ADME/Tox profile of KDS2010.

Table S3. In vivo pharmacokinetic parameters of KDS2010.

Table S4. KDS2010 interactions with 87 primary molecular targets including GPCRs, kinases, non-kinase enzymes, nuclear receptors, transporters, and various ion channels.

Table S5. KDS2010 interactions with 97 kinase including TK, TKL, STE, CK1, AGC, CAMK, CMGC, ATYPICAL, LIPID, and Mutant form.

Table S6. Detailed information for statistical analysis.

Table S7. Primer sequences for each enzyme (F: forward primer and R: reverse primer).

## Supplementary Results

### Reversibility test

To investigate the reversibility of KDS2010 MAO-B inhibition, we measured MAO-B inhibition after three separate washes. First, the inhibitory activities of 1  $\mu\text{M}$  KDS2010 and 1  $\mu\text{M}$  selegiline, an irreversible MAO-B inhibitor, were examined. Both compounds inhibited human MAO-B (hMAO-B) activity by over 90%. Next, an aliquot of the enzyme solution containing 1  $\mu\text{M}$  of compound was washed using an effective centrifugation ultrafiltration method. After 3 repeat washes of the KDS2010 sample, 82% of the hMAO-B enzymatic activity was recovered, indicating that KDS2010 is a reversible inhibitor. However, enzymatic activity was not recovered in the assay performed with selegiline (Fig. 2E).

### Mode of MAO-B inhibition of KDS2010

To examine the mode of MAO-B inhibition, substrate-dependent kinetic experiments were performed, and both the corresponding progression curves and the Lineweaver–Burk plots were generated. The Michaelis–Menten kinetic parameters, Michaelis constant ( $K_m$ ) and maximal velocity ( $V_{\text{max}}$ ) of hMAO-B inhibition were determined in the presence and absence of KDS2010. The Lineweaver–Burk plot for different concentration of KDS2010 was linear and intersected at the y-axis. Using Sigma plot<sup>®</sup>,  $V_{\text{max}}$ ,  $K_m$  and inhibition constant ( $K_i$ ) were calculated ( $V_{\text{max}} = 3.303\text{e}^{-7}$ ,  $K_m = 1.02\text{e}^{-4}$  and  $K_i = 2.48\text{e}^{-9}$ ). These results indicate that KDS2010 is a competitive MAO-B inhibitor (Figure S3).

### Molecular modeling

We performed a molecular docking study to investigate the KDS2010 binding site on hMAO-B. Fig. 2G shows an overlay of the KDS2010 binding pose inside the hMAO-B protein with that of selegiline, which covalently binds to FAD. KDS2010 had a very compact binding pose with a glide score of -10.611 kcal/mol. The fluorine atom formed one halogen bond with PRO102 (Fig. 2G, middle). KDS2010 formed two hydrogen bonds with GLN206. In the hydrophobic region of the binding cavity, the central benzene ring of KDS2010 was engaged through  $\pi$ -sulfur interaction with CYS172 and  $\pi$ - $\pi$  T-shaped interactions with TYR326, which is the “gating” residue in the MAO-B inhibitor binding site.

The binding mode of KDS2010 was compared to that of selegiline (Fig. 2G, right). The alkyne group of selegiline formed a covalent bond with FAD, and the phenyl group was fixed in position inside the inhibitor binding site by two  $\pi$ -type interactions with TYR326 and CYS172. We also have shown 3D and 2D interactions of Selegiline, KDS2010, and KDS0014 (Fig. S5). Figures in the main article (Fig. 2) rendered by pymol software. 2D and 3D-zoomed figures of interactions were prepared using Discovery Studio 2018 Software. KDS0014 has a slightly lower docking score of -9.820 kcal/mol but has a similar interactions with KDA2010. Hydrogen bond interactions with GLN206, pi-sulfur contact with CYS172, pi-pi-static interactions with TYR326, and pi-alkyl contacts with ILE199, ILE171 are similar to KDS2010. Overall KDS2010 possibly occupied the same binding cavity as selegiline but formed more compact reversible interactions with important residues according to the molecular modeling results.

#### ***In vitro* and *in vivo* Absorption, Distribution, Metabolism and Excretion/Toxicity (ADME/Tox) studies**

To determine whether KDS2010 has good drug-like properties for clinical candidate, we performed various *in vitro* and *in vivo* ADME/Tox tests. First, KDS2010 showed favorable metabolic stabilities against 4 selected liver microsomal enzymes (human, dog, rat, and mouse), with 92%, 61%, 60% and 66% of the parent compound remaining after 30 min of incubation, respectively. Plasma stabilities of KDS2010 in both human and rat were also excellent, with 98% and 95% of the parent compound remaining after 120 min of incubation, respectively (table S2). In the CYP inhibition test, the KDS2010 IC<sub>50</sub> values against 5 tested isotypes (1A2, 2C9, 2C19, 2D6, and 3A4) were over 10  $\mu$ M, indicating that KDS2010 is not likely to cause adverse effects by means of drug-drug interactions (table S2). In the *in vivo* toxicity studies, no significant toxicities were observed after oral administration of either a single dose tested up to 1,000 mg/kg body weight or 14 consecutive doses tested up to 200 mg/kg/day. Therefore, the No Observed Adverse Effect Level (NOAEL) for KDS 2010 was > 1,000 mg/kg and > 200 mg/kg/day for single dose and 14-day repeated doses, respectively (table S2). In addition, in a hERG channel binding assay, KDS2010 exerted low inhibitory effects against hERG, an important cardiac ion channel, indicating that it is unlikely to cause human cardiotoxicity.

### ***In vivo* Pharmacokinetics/Blood-Brain Barrier (PK/BBB) study**

We investigated *in vivo* PK of KDS2010 and observed an excellent PK profile with a favorable half-life ( $t_{1/2} = 3.3 \pm 0.2$  h), high drug exposure in the blood after oral administration ( $C_{\max} = 952.1 \pm 80.3$ ), and excellent bioavailability ( $F = 123\%$ ). The total drug concentration in the brain 2 h after oral administration (10 mg/kg body weight) was very high ( $6,716.3 \pm 260.6$  ng/g) and the brain-to-plasma total drug concentration ratio (brain total drug concentration/plasm total drug concentration, B/P; 2h after oral administration) was 9.2, indicating that KDS2010 is a suitable CNS drug (table S3).

## Supplementary Materials and Methods

### Kinetic studies of MAO-B inhibition

To examine the interaction mode of KDS2010, the type of enzyme inhibition was determined by using Michaelis-Menten kinetic experiments. The detailed MAO-B enzyme assay is described in the online methods. Briefly, the catalytic rates of human MAO-B enzyme were measured at six different concentrations of the benzylamine substrate (0.063, 0.125, 0.25, 0.5, 1 and 2 mM) in the absence or in the presence of four different concentrations of KDS2010 (0.1, 0.3, 1, 3 and 10 nM). The corresponding progression curves and the Lineweaver-Burk plots were generated using Sigma plot<sup>®</sup>. In addition, the maximal velocity ( $V_{max}$ ), Michaelis constant ( $K_m$ ) and inhibition constant ( $K_i$ ) were calculated.

### Pharmacokinetic study

Rats (Sprague-Dawley) were purchased from Koatech (Korea), and maintained in a specific pathogen-free facility (Laboratory Animal Center, Daegu-Gyeongbuk Medical Innovation Foundation, Korea). Rats (250-300 g) at 7-week of age were fasted for 16 h and used in the pharmacokinetic experiments. Control blood was collected from the jugular vein prior to KDS2010 administration. For oral administration, four rats were treated with a suspension of KDS2010 in 10% DMSO, 15% water, and 75% PEG400 at a dose of 10 mg/kg via oral gavage. For intravenous administration, KDS2010 was injected at a dose of 1 mg/kg via the caudal vein. Dosing volume of KDS2010 was 600  $\mu$ L for oral and 200  $\mu$ L for intravenous administration. Blood from the jugular vein was collected in heparinized tubes at 0.08, 0.25, 0.5, 1, 2, 4, 6 and 8 h after compound administration. The plasma was isolated from the blood samples by centrifugation at 12,000 rpm for 15 min. Then, 20  $\mu$ L of plasma was mixed with 80  $\mu$ L of acetonitrile (Sigma) containing internal standard and centrifuged at 14,000 rpm for 5 min. The plasma supernatants were collected and loaded into triple quadrupole LC-MS/MS (Triple Quad 5500, Applied Biosystems) to measure the KDS2010 serum concentration. The standard curve range was 5 to 1000 ng/mL and the lower limit of quantification of measurements was 5 ng/mL. Pharmacokinetic parameters were analyzed by non-compartmental analysis using Phoenix WinNolin version 6.4 (Pharsight).

To determine the brain-to-plasma ratio (B/P), brains obtained from rats 2 h after oral administration (10 mg/kg) were washed three times with PBS to remove blood and homogenized in 4 volumes per brain weight of PBS. In total, 20  $\mu$ L of brain homogenate was added to 80  $\mu$ L acetonitrile and the mixture was centrifuged at 14,000 rpm for 5 min. The supernatant was analyzed using the method described above to determine the brain KDS2010 concentration.

### ***In vivo* toxicity**

*In vivo* toxicity studies were performed by Medicilon (Medicilon Preclinical Research LLC.). For single dose tests, the rats (Sprague Dawley,  $n=10$ /group) were administered KDS2010 at 250, 500, 1000 or 2000 mg/kg via oral gavage and changes in mortality, body weight, and food consumption were monitored for 14 days. For the repeated dose test, the rats ( $n=20$ /group) were given KDS2010 at 50, 100 and 200 mg/kg/day for 14 consecutive days via oral gavage and sacrificed on day 15th for pathological assessments. The volume for each administration was 10 mL/kg/day.

### ***In vitro* assays for CYP inhibition**

The luminescence assay using the P450-Glo screening systems (Promega) was used to determine if KDS2010 inhibits CYP. The luminogenic inhibition assays were performed following the protocols from Promega Corp. (Technical Bulletin, P450-Glo Assays, Promega Corp., 2009). Briefly, a CYP enzyme and an appropriate substrate were combined in potassium phosphate ( $KPO_4$ ) buffer (100 mM, pH 7.4) with or without KDS2010, and the reaction was initiated by adding an NADPH regenerating system (containing  $NADP^+$ , glucose-6-phosphate, magnesium chloride ( $MgCl_2$ ) and glucose-6-phosphate dehydrogenase). After incubation at 37 °C for 10-30 min (different incubation time depending on the isotype), the reconstituted luciferin detection reagent was added to stop the reaction and produce the luminescent signal. After 20 min of incubation to stabilize the signal, luminescence was detected using microplate reader (SpectraMax<sup>®</sup>i3, Molecular Devices) and the values were reported as relative light unit (RLU).

### **Assessment of metabolic stability**

To assess the stability of KDS2010 against human liver microsomes, reaction mixture (120  $\mu$ L) consisting of 1  $\mu$ M KDS2010, human liver microsomal fractions (0.5 mg/mL,

Corning®UltraPool™ HLM150), NADPH-regenerating system (10 mM glucose-6-phosphate, 0.2 U/ml glucose-6-phosphate dehydrogenase and 9.2 mM MgCl<sub>2</sub>), and 100 mM potassium phosphate (pH 7.4) was pre-incubated for 5 min at 37 °C. The reaction was initiated by addition of NADPH (1.2 mM). At 0 and 30 min, samples (50 µL) were taken from the reaction mixture, combined with acetonitrile (50 µL), and centrifuged at 10,000×g for 10 min. The supernatants were analyzed by LC/MS/MS to detect the remaining KDS2010.

To assess the stability of KDS2010 against plasma enzymes, human plasma (198 µL Sigma-Aldrich) was pre-incubated for 5 min at 37 °C and then 2 µL of KDS2010 (100 µM, final concentration 1 µM) was added. At 0, 15 and 30 min, samples (50 µL) were taken from the reaction mixture, combined with acetonitrile (50 µL), and centrifuged at 10,000×g for 5 min. The supernatants were analyzed by LC/MS/MS to detect the remaining KDS2010. The percentage of the parent compound remaining was calculated by comparing peak areas.

### **hERG channel inhibition assay**

hERG channel binding assay was performed using predictor hERG fluorescence polarization assay (#PV5365, Invitrogen) according to the manufacturer's instructions. Briefly, KDS2010 was serially diluted (16 points, 3-fold) and incubated with the reaction mixture containing hERG membrane, fluorescence tracer red dye and fluorescence polarization buffer for 4 h at 25 °C. Fluorescence (Excitation at 530 nm, Emission at 590 nm) was measured using a multi-mode microplate reader (Synergy Neo, Biotek). E-4031 was used as a positive standard (IC<sub>50</sub> = 10-90 nM).

### **General Synthetic Method**

Melting points were determined in open capillary tubes using a Stanford Research Systems melting point apparatus and were uncorrected. Reactions progression was checked using analytical thin-layer chromatography (TLC) plates (#1.05715, Merck) and analyzed with 254 nm and 365 nm ultraviolet light. The reaction mixtures were purified by flash column chromatography using silica gel (#1.09385, Merck). Nuclear magnetic resonance (NMR) spectral data were obtained at either 300 MHz (<sup>1</sup>H) or 400 MHz (<sup>1</sup>H) and at 75 MHz (<sup>13</sup>C) or 100 MHz (<sup>13</sup>C) using a BRUKER apparatus. Chemical shifts ( $\delta$ ) were expressed in parts per million (ppm) from Tetramethylsilane (TMS), the internal standard and coupling constants ( $J$ ) were expressed

in hertz and assigned as follows: s, singlet; d, doublet; t, triplet; q, quartet; AB<sub>q</sub>, AB quartet; br, broad. All chemical reagents and solvents were of reagent grade, used without further purification and were purchased from commercial sources. Low-resolution mass spectrometry was performed on a liquid chromatograph mass spectrometer (SHIMADZU Excellence in Science, LCMS-2020). Analytical HPLC was performed using a Waters E2695 system equipped with a SHISEIDO capcell pak C<sub>18</sub> MG II column (4.6 mm × 150 mm; 5 μm). HPLC data were recorded using the following parameters: 1% acetic acid in H<sub>2</sub>O/MeCN, 90/10 → 0/100 in 10 min, +10 min isocratic hold, flow rate of 1.0 mL/min, λ = 254 and 280 nm. Compounds were checked by using TLC, <sup>1</sup>H and <sup>13</sup>C NMR and LR-MS. The TLC, NMR, and the analytical data confirmed that the purity of the products was ≥ 95%.

#### **General procedure for the aldehyde compounds (2a–2k) (Method A)**

A mixture of 4-bromobenzaldehyde, the desired quantity of arylboronic acid (**1a–1k**) (1.3 equiv), tetrakis(triphenylphosphine)palladium(0) (4–8 mol%), and Na<sub>2</sub>CO<sub>3</sub> (4.86 equiv) in degassed toluene/H<sub>2</sub>O (7/3) was refluxed for 18 h. The reaction mixture was filtered through celite and concentrated *in vacuo*. The resulting residue was dissolved in EtOAc (200 mL), and washed with H<sub>2</sub>O (2 × 200 mL). The organic layer was dried with anhydrous Na<sub>2</sub>SO<sub>4</sub> and concentrated *in vacuo*. The residue was purified by using column chromatography on silica gel.

#### **General procedure for the free amine compounds (3a–3k) (Method B)**

To a solution of L-alaninamide hydrochloride (1.2 equiv, > 95% optical purity) in anhydrous methanol, triethylamine (TEA, 1.5 equiv) was added, and then the desired biphenyl aldehyde (**2a–2k**) was added at room temperature. After 2–5 h, the reaction mixture was concentrated *in vacuo*. The residue was dissolved in EtOAc and washed with brine. The organic layer was dried over anhydrous Na<sub>2</sub>SO<sub>4</sub>, and then sodium cyanoborohydride (4–6 equiv) was added to the reaction mixture at 0°C. The reaction mixture was stirred at room temperature (18 h) and further concentrated *in vacuo*. The residue was dissolved in EtOAc (150 mL) and washed with brine (2 × 150 mL). The organic layer was dried over anhydrous Na<sub>2</sub>SO<sub>4</sub> and concentrated *in vacuo*. The residue was purified by using column chromatography on Silica gel.



### General procedure for the final KDS compounds (Method C)

Methanesulfonic acid (1.00-1.25 equiv) was added to a solution of amine **3a–3k** (1 equiv) in EtOAc at 50-55°C. After 1 h, the reaction mixture was cooled to room temperature, filtered *in vacuo* and washed with EtOAc. The filter cake was dried, yielding the desired compounds without further purification.

### 2'-Fluoro-[1,1'-biphenyl]-4-carbaldehyde (**2a**)

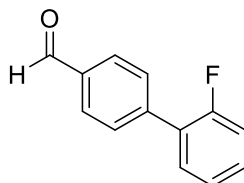

Using Method A, 4-bromobenzaldehyde (1.00 g, 5.40 mmol), 2-fluorophenylboronic acid (**1a**) (0.97 g, 6.92 mmol), tetrakis(triphenylphosphine)palladium(0) (0.25 g, 0.216 mmol) and Na<sub>2</sub>CO<sub>3</sub> (2.78 g, 26.3 mmol) in toluene/H<sub>2</sub>O (50 mL/7.2 mL) gave **2a** as a white solid (0.26 g, 24%); *R<sub>f</sub>* = 0.65 (n-Hexane/EtOAc 9/1); mp 43–45 °C; <sup>1</sup>H NMR (300 MHz, DMSO-*d*<sub>6</sub>) δ 10.07 (s, C(O)H), 7.98-8.06 (m, 2ArH), 7.79 (dd, *J* = 1.6, 8.2 Hz, 2ArH), 7.62 (td, *J* = 1.7, 7.9 Hz, 1ArH), 7.49–7.55 (m, 1ArH), 7.44–7.49 (m, 2ArH); <sup>13</sup>C NMR (100 MHz, CDCl<sub>3</sub>) δ 191.9 (C(O)H), 159.8 (d, *J*<sub>C-F</sub> = 247.7 Hz), 142.0, 135.4, 130.7 (d, *J*<sub>C-F</sub> = 14.4 Hz), 130.2 (d, *J*<sub>C-F</sub> = 8.3 Hz), 129.8, 129.7 (d, *J*<sub>C-F</sub> = 7.5 Hz), 127.8 (q, *J*<sub>C-F</sub> = 13.1 Hz), 124.6, 116.3 (d, *J*<sub>C-F</sub> = 20.8 Hz) (ArC).

### 3'-Fluoro-[1,1'-biphenyl]-4-carbaldehyde (**2b**)

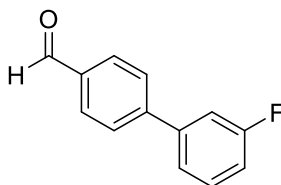

Using Method A, 4-bromobenzaldehyde (2.98 g, 16.09 mmol), 3-fluorophenylboronic acid (**1b**) (3.91 g, 20.60 mmol), tetrakis(triphenylphosphine)palladium(0) (0.74 g, 0.64 mmol) and Na<sub>2</sub>CO<sub>3</sub> (8.29 g, 78.2 mmol) in toluene/H<sub>2</sub>O (148.9 mL/21.4 mL) gave **2b** as a white solid (2.64 g, 82%); *R<sub>f</sub>* = 0.30 (n-Hexane/EtOAc 15/1); mp 33–35 °C; <sup>1</sup>H NMR (400 MHz, DMSO-*d*<sub>6</sub>) δ 10.07 (s, C(O)H), 8.01 (d, *J* = 8.3 Hz, 2ArH), 7.96 (d, *J* = 8.3 Hz, 2ArH), 7.63–7.67 (m, 2ArH), 7.54–7.59 (m, 1ArH), 7.27–7.31 (m, 1ArH); <sup>13</sup>C NMR (75 MHz, DMSO-*d*<sub>6</sub>) 193.0 (C(O)H), 163.1 (d, *J*<sub>C-F</sub> = 242.4 Hz, CF), 144.8 (d, *J*<sub>C-F</sub> = 2.2 Hz), 141.6 (d, *J*<sub>C-F</sub> = 7.9 Hz), 135.9, 131.4 (d, *J*<sub>C-F</sub> =

8.4 Hz), 130.5, 127.9, 123.6 (d,  $J_{C-F} = 2.6$  Hz), 115.7 (d,  $J_{C-F} = 20.9$  Hz), 114.3 (d,  $J_{C-F} = 22.3$  Hz) (ArC).

#### 4'-Fluoro-[1,1'-biphenyl]-4-carbaldehyde (**2c**)

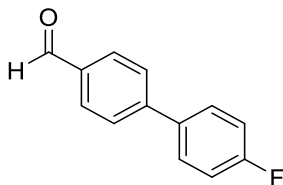

Using Method A, 4-bromobenzaldehyde (1.50 g, 8.11 mmol), 4-fluorophenylboronic acid (**1c**) (1.45 g, 10.38 mmol), tetrakis(triphenylphosphine)palladium(0) (0.75 g, 0.65 mmol) and  $\text{Na}_2\text{CO}_3$  (4.18 g, 39.40 mmol) in toluene/ $\text{H}_2\text{O}$  (75 mL/10.8 mL) gave **2c** as a white solid (1.51 g, 93%);  $R_f = 0.25$  (n-Hexane/EtOAc 10/1); mp 79–80 °C;  $^1\text{H}$  NMR (400 MHz,  $\text{DMSO}-d_6$ )  $\delta$  10.05 (s, C(O)H), 7.99 (d,  $J = 8.1$  Hz, 2ArH), 7.90 (d,  $J = 8.1$  Hz, 2ArH), 7.84 (d,  $J = 5.7$  Hz, 2ArH), 7.81 (d,  $J = 5.7$  Hz, 2ArH), 7.32–7.37 (m, 2ArH);  $^{13}\text{C}$  NMR (75 MHz,  $\text{CDCl}_3$ )  $\delta$  191.8 (C(O)H), 163.2 (d,  $J_{C-F} = 246.9$  Hz, CF), 146.1, 135.9 (d,  $J_{C-F} = 3.3$  Hz), 135.2, 130.3, 129.1 (d,  $J_{C-F} = 8.2$  Hz), 127.5, 116.0 (d,  $J_{C-F} = 86.1$  Hz) (ArC).

#### 2'-Chloro-[1,1'-biphenyl]-4-carbaldehyde (**2d**)

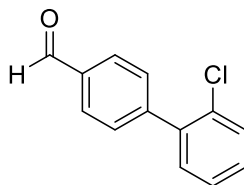

Using method A, , 4-bromobenzaldehyde (3.00 g, 16.21 mmol), 2-chlorophenylboronic acid (**1d**) (3.25 g, 20.75 mmol), tetrakis(triphenylphosphine)palladium(0) (0.75 g, 0.65 mmol) and  $\text{Na}_2\text{CO}_3$  (8.35 g, 78.8 mmol) in toluene/ $\text{H}_2\text{O}$  (150 mL/21.6 mL) gave **2d** as a white solid (0.39 g, 11%);  $R_f = 0.20$  (n-Hexane/EtOAc 5/1); mp 71–72 °C;  $^1\text{H}$  NMR (300 MHz,  $\text{DMSO}-d_6$ )  $\delta$  10.08 (s, C(O)H), 8.00 (d,  $J = 7.9$  Hz, 2ArH), 7.67 (d,  $J = 7.9$  Hz, 2ArH), 7.58–7.64 (m, 1ArH), 7.44–7.52 (m, 3ArH);  $^{13}\text{C}$  NMR (75 MHz,  $\text{DMSO}-d_6$ )  $\delta$  193.1 (C(O)H), 145.0, 139.2, 135.8, 131.6, 130.6, 130.5, 1300.4, 129.8, 128.1 (ArC).

### 3'-Chloro-[1,1'-biphenyl]-4-carbaldehyde (**2e**)

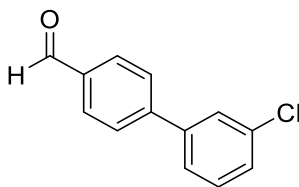

Using Method A, 4-bromobenzaldehyde (0.50 g, 2.7 mmol), 3-chlorophenylboronic acid (**1e**) (0.52 g, 3.24 mmol), tetrakis(triphenylphosphine)palladium(0) (0.12 g, 0.11 mmol) and Na<sub>2</sub>CO<sub>3</sub> (1.39 g, 13.13 mmol) in toluene/H<sub>2</sub>O (25 mL/3.6 mL) gave **2e** as a white solid (0.49 g, 84%); *R<sub>f</sub>* = 0.25 (n-Hexane/EtOAc 9/1); mp 49–51 °C; <sup>1</sup>H NMR (400 MHz, DMSO-*d*<sub>6</sub>) δ 10.07 (s, C(O)H), 8.02 (d, *J* = 8.2 Hz, 2ArH), 7.96 (d, *J* = 8.2 Hz, 2ArH), 7.85 (s, 1ArH), 7.75 (d, *J* = 7.3 Hz, 1ArH), 7.57–7.50 (m, 2ArH); <sup>13</sup>C NMR (400 MHz, DMSO-*d*<sub>6</sub>) δ 193.1 (C(O)H), 144.6, 141.4, 136.0, 134.4, 131.3, 131.3, 130.6, 128.8, 128.0, 127.4, 127.3, 126.3 (ArC).

### 4'-Chloro-[1,1'-biphenyl]-4-carbaldehyde (**2f**)

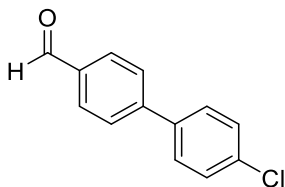

Using Method A, 4-bromobenzaldehyde (3.00 g, 16.21 mmol), 4-chlorophenylboronic acid (**1f**) (3.25 g, 20.75 mmol), tetrakis(triphenylphosphine)palladium(0) (0.75 g, 0.65 mmol) and Na<sub>2</sub>CO<sub>3</sub> (8.35 g, 78.8 mmol) in toluene/H<sub>2</sub>O (150 mL/21.6 mL) gave **2f** as a white solid (2.73 g, 78%); *R<sub>f</sub>* = 0.35 (n-Hexane/EtOAc 10/1); mp 142–145 °C; <sup>1</sup>H NMR (300 MHz, DMSO-*d*<sub>6</sub>) δ 10.06 (s, C(O)H), 8.01 (d, *J* = 8.2 Hz, 2ArH), 7.92 (d, *J* = 8.2 Hz, 2ArH), 7.81 (d, *J* = 8.5 Hz, 2ArH), 7.56 (d, *J* = 8.5 Hz, 2ArH); <sup>13</sup>C NMR (75 MHz, CDCl<sub>3</sub>) δ 191.7 (C(O)H), 145.8, 138.2, 135.5, 134.8, 130.3, 129.2, 129.1, 128.6, 128.3, 127.9, 127.5 (ArC).

### 2'-(Trifluoromethyl)-[1,1'-biphenyl]-4-carbaldehyde (**2g**)

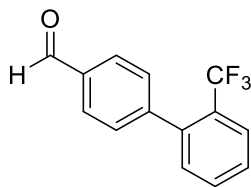

Using Method A, 4-bromobenzaldehyde (3.00 g, 16.22 mmol), 2-(trifluoromethyl) phenylboronic acid (**1g**) (3.94 g, 20.76 mmol), tetrakis(triphenylphosphine)palladium(0) (0.76 g, 0.64 mmol) and Na<sub>2</sub>CO<sub>3</sub> (8.36 g, 78.8 mmol) in toluene/H<sub>2</sub>O (150 mL/21.6 mL) gave **2g** as a white solid (0.40 g, 10%); *R<sub>f</sub>* = 0.25 (n-Hexane/EtOAc 15/1); mp 77–80 °C; <sup>1</sup>H NMR (300 MHz, CDCl<sub>3</sub>) δ 10.08 (s, C(O)H), 7.93 (d, *J* = 8.3 Hz, 2ArH), 7.78 (d, *J* = 7.9 Hz, 2ArH), 7.46–7.65 (m, 4ArH), 7.33 (d, *J* = 7.32 Hz, 1ArH); <sup>13</sup>C NMR (75 MHz, DMSO-*d*<sub>6</sub>) δ 193.3 (C(O)H), 145.7, 139.9, 136.0, 132.9, 132.2, 130.1, 129.5, 129.1, 127.2 (q, *J*<sub>C-F</sub> = 29.4 Hz), 126.7 (q, *J*<sub>C-F</sub> = 5.2 Hz), 124.5 (q, *J*<sub>C-F</sub> = 272.2 Hz) (ArC).

### 3'-(Trifluoromethyl)-[1,1'-biphenyl]-4-carbaldehyde (**2h**)

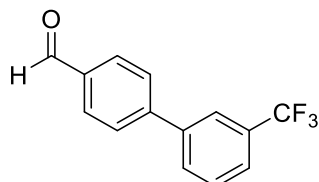

Using Method A, 4-bromobenzaldehyde (0.50 g, 2.70 mmol), 3-(trifluoromethyl) phenylboronic acid (**1h**) (0.67 g, 3.51 mmol), tetrakis(triphenylphosphine)palladium(0) (0.13 g, 0.11 mmol) and Na<sub>2</sub>CO<sub>3</sub> (1.43 g, 13.51 mmol) in toluene/H<sub>2</sub>O (25 mL/3.6 mL) gave **2h** as a colorless oil (0.61 g, 97%); *R<sub>f</sub>* = 0.20 (n-Hexane/EtOAc 15/1); <sup>1</sup>H NMR (400 MHz, DMSO-*d*<sub>6</sub>) δ 10.10 (s, C(O)H), 8.00–8.10 (m, 6ArH), 7.73–7.82 (m, 2ArH); <sup>13</sup>C NMR (75 MHz, CDCl<sub>3</sub>) δ 191.8 (C(O)H), 145.6, 130.6, 135.8, 131.5 (q, *J*<sub>C-F</sub> = 32.2 Hz), 130.7, 130.4, 129.6, 127.9, 125.1 (q, *J*<sub>C-F</sub> = 3.8 Hz), 124.2 (q, *J*<sub>C-F</sub> = 3.7 Hz), 124.0 (q, *J*<sub>C-F</sub> = 270.6 Hz) (ArC).

### 4'-(Trifluoromethyl)-[1,1'-biphenyl]-4-carbaldehyde (**2i**)

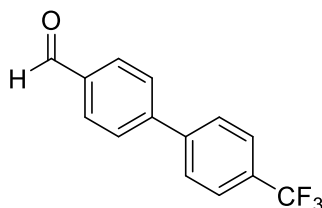

Using Method A, 4-bromobenzaldehyde (1.50 g, 8.11 mmol), 3-(trifluoromethyl) phenylboronic acid (**1i**) (1.97 g, 10.38 mmol), tetrakis(triphenylphosphine)palladium(0) (0.38 g, 0.32 mmol) and Na<sub>2</sub>CO<sub>3</sub> (4.18 g, 39.4 mmol) in toluene/H<sub>2</sub>O (75 mL/10.8 mL) gave **2i** as a white solid (1.17 g, 58%); *R<sub>f</sub>* = 0.30 (Hexane/EtOAc 10/1); mp 73–74 °C; <sup>1</sup>H NMR (300 MHz, CDCl<sub>3</sub>) δ 10.09 (s,

C(O)H), 7.97–8.01 (m, 2ArH), 7.74–7.77 (m, 6ArH);  $^{13}\text{C}$  NMR (75 MHz,  $\text{CDCl}_3$ )  $\delta$  193.2 (C(O)H), 144.6, 143.3, 136.2, 130.7, 129.2 (q,  $J_{\text{C-F}} = 31.7$  Hz), 128.4, 128.3, 126.4 (q,  $J_{\text{C-F}} = 3.8$  Hz), 124.6 (q,  $J_{\text{C-F}} = 264.0$  Hz) (ArC).

### 3'-(Trifluoromethoxy)-[1,1'-biphenyl]-4-carbaldehyde (**2j**)

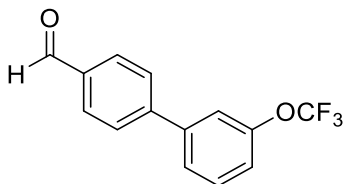

Using Method A, 4-bromobenzaldehyde (2.00 g, 10.8 mmol), 3-(trifluoromethoxy) phenylboronic acid (**1j**) (2.85 g, 13.8 mmol), tetrakis(triphenylphosphine)palladium(0) (0.5 g, 0.43 mmol) and  $\text{Na}_2\text{CO}_3$  (5.57 g, 52.5 mmol) in toluene/ $\text{H}_2\text{O}$  (100 mL/14.4 mL) gave **2j** as a colorless oil (2.15 g, 75%);  $R_f = 0.35$  (n-Hexane/EtOAc 10/1);  $^1\text{H}$  NMR (300 MHz,  $\text{DMSO-d}_6$ )  $\delta$  10.08 (s, C(O)H), 8.02 (dd,  $J = 1.9, 6.6$  Hz, 2ArH), 7.97 (dd,  $J = 1.9, 6.6$  Hz, 2ArH), 7.81–7.86 (m, 1ArH), 7.76 (s, 1ArH), 7.66 (t,  $J = 8.0$  Hz, 1ArH), 7.42–7.50 (m, 1ArH);  $^{13}\text{C}$  NMR (75 MHz,  $\text{CDCl}_3$ )  $\delta$  191.8 (C(O)H), 149.8 (COCF<sub>3</sub>), 145.5, 141.9, 135.8, 130.4, 130.3, 128.7, 125.7, 120.7, 120.5 (q,  $J_{\text{C-F}} = 256.0$  Hz), 120.0 (ArC).

### 4'-(Trifluoromethoxy)-[1,1'-biphenyl]-4-carbaldehyde (**2k**)

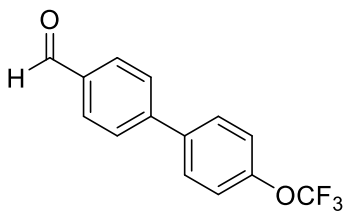

Using Method A, 4-bromobenzaldehyde (0.50 g, 2.70 mmol), 3-methoxyphenylboronic acid (**1k**) (0.71 g, 3.46 mmol), tetrakis(triphenylphosphine)palladium(0) (0.13 g, 0.108 mmol) and  $\text{Na}_2\text{CO}_3$  (1.39 g, 13.1 mmol) in toluene/ $\text{H}_2\text{O}$  (25 mL/3.6 mL) gave **2k** as a white solid (0.71 g, 98%);  $R_f = 0.65$  (n-Hexane/EtOAc 9/1); mp 31–33 °C;  $^1\text{H}$  NMR (300 MHz,  $\text{DMSO-d}_6$ )  $\delta$  10.07 (s, C(O)H), 7.96–8.05 (m, 2ArH), 7.88–7.95 (m, 4ArH), 7.51 (d,  $J = 8.0$  Hz, 2ArH);  $^{13}\text{C}$  NMR (75 MHz,  $\text{CDCl}_3$ )  $\delta$  191.7 (C(O)H), 149.5266, 145.7, 138.4, 135.5, 130.3, 128.8, 127.7, 121.4, 120.5 (q,  $J_{\text{C-F}} = 256.1$  Hz) (ArC).

**(S)-2-(((2'-Fluoro-[1,1'-biphenyl]-4-yl)methyl)amino)propanamide (3a)**

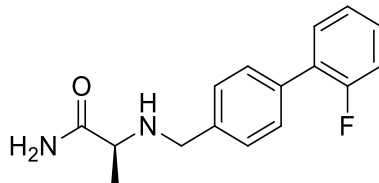

Using method B, L-alaninamide hydrochloride (0.19 g, 1.52 mmol), triethylamine (0.21 mL, 1.52 mmol) **2a** (0.25 g, 1.27 mmol) and sodium cyanoborohydride (0.13 g, 1.90 mmol) in MeOH (1.3 mL) gave **3a** as a white solid (0.21 g, 62%);  $R_f = 0.10$  (EtOAc); mp 133–136 °C;  $^1\text{H NMR}$  (300 MHz,  $\text{DMSO}-d_6$ )  $\delta$  7.26–7.58 (m, 8ArH, C(O)NHH'), 7.01 (br s, C(O)NHH'), 3.59 and 3.74 (AB<sub>q</sub>,  $J = 13.7$  Hz, CH<sub>2</sub>), 3.03 (q,  $J = 6.8$  Hz, CH), 2.43 (br s, NH), 1.15 (d,  $J = 6.8$  Hz, CH<sub>3</sub>);  $^{13}\text{C NMR}$  (75 MHz,  $\text{CDCl}_3$ )  $\delta$  178.1 (C(O)), 159.8 (d,  $J_{\text{C-F}} = 246.1$  Hz), 139.0, 134.9, 130.7 (d,  $J_{\text{C-F}} = 3.5$  Hz), 129.2 (d,  $J_{\text{C-F}} = 2.8$  Hz), 128.8 (d,  $J_{\text{C-F}} = 8.2$  Hz), 128.1, 124.4 (d,  $J_{\text{C-F}} = 3.7$  Hz), 116.1 (d,  $J_{\text{C-F}} = 22.6$  Hz) (ArC), 57.8 (CH), 52.2 (CH<sub>2</sub>), 19.7 (CH<sub>3</sub>).

**(S)-2-(((3'-Fluoro-[1,1'-biphenyl]-4-yl)methyl)amino)propanamide (3b)**

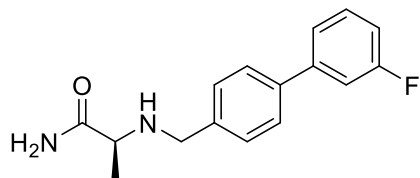

Using method B, L-alaninamide hydrochloride (0.58 g, 4.63 mmol), triethylamine (0.81 mL, 5.78 mmol), **2b** (0.77 g, 3.85 mmol) in MeOH (4.19 mL), and sodium cyanoborohydride (0.38 g, 5.78 mmol) in MeOH (3.85 mL) gave **3b** as a white solid (0.48 g, 45%);  $R_f = 0.20$  (EtOAc); mp 128–130 °C;  $^1\text{H NMR}$  (300 MHz,  $\text{DMSO}-d_6$ )  $\delta$  7.65 (d,  $J = 8.12$  Hz, 2ArH), 7.48–7.52 (m, 3ArH), 7.43 (d,  $J = 8.2$  Hz, 2ArH), 7.34 (br s, C(O)NHH'), 7.14–7.21 (m, 1ArH), 6.99 (br s, C(O)NHH'), 3.59 and 3.73 (AB<sub>q</sub>,  $J = 13.7$  Hz, CH<sub>2</sub>), 3.03 (q,  $J = 6.9$  Hz, CH), 2.43 (br s, NH), 1.15 (d,  $J = 6.87$  Hz, CH<sub>3</sub>);  $^{13}\text{C NMR}$  (75 MHz,  $\text{CDCl}_3$ )  $\delta$  178.1 (C(O)), 163.2 (d,  $J_{\text{C-F}} = 244.0$  Hz), 143.1 (d,  $J_{\text{C-F}} = 7.6$  Hz), 139.3, 139.0 (d,  $J_{\text{C-F}} = 2.2$  Hz), 130.3 (d,  $J_{\text{C-F}} = 8.3$  Hz), 128.6, 127.3, 122.7 (d,  $J_{\text{C-F}} = 2.7$  Hz), 114.1 (d,  $J_{\text{C-F}} = 21.0$  Hz), 113.9 (d,  $J_{\text{C-F}} = 21.9$  Hz) (ArC), 57.7 (CH), 52.2 (CH<sub>2</sub>), 19.7 (CH<sub>3</sub>).

**(S)-2-(((4'-Fluoro-[1,1'-biphenyl]-4-yl)methyl)amino)propanamide (3c)**

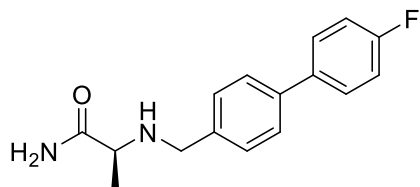

Using method B, L-alaninamide hydrochloride (0.37 g, 3.0 mmol), triethylamine (1.04 mL, 7.49 mmol), **2c** (0.50 g, 2.50 mmol) in MeOH (2.71 mL), and sodium cyanoborohydride (0.28 g, 3.75 mmol) in MeOH (2.50 mL) gave **3c** as a white solid (0.35 g, 51%);  $R_f = 0.20$  (EtOAc); mp 129–133 °C;  $^1\text{H NMR}$  (300 MHz,  $\text{DMSO-}d_6$ )  $\delta$  7.65–7.72 (m, 2ArH), 7.58 (d,  $J = 8.2$  Hz, 2ArH), 7.35 (br s, C(O)NHH'), 7.24–7.31(m, 2ArH), 6.99 (br s, C(O)NHH'), 3.58 and 3.72 (AB<sub>q</sub>,  $J = 13.7$  Hz, CH<sub>2</sub>), 3.03 (q,  $J = 6.9$  Hz, CH), 1.15 (d,  $J = 6.9$  Hz, CH<sub>3</sub>), the remaining peak was not detected and is believed to overlap with H<sub>2</sub>O signals;  $^{13}\text{C NMR}$  (100 MHz,  $\text{DMSO-}d_6$ )  $\delta$  177.4 (C(O)), 162.2 (d,  $J_{\text{C-F}} = 181.9$  Hz), 140.4, 138.0, 137.0 (d,  $J_{\text{C-F}} = 2.3$  Hz), 129.0, 126.9 (d,  $J_{\text{C-F}} = 5.2$  Hz), 116.2 (ArC), 56.9 (CH), 51.1 (CH<sub>2</sub>), 19.8 (CH<sub>3</sub>), the remaining aromatic peak was not detected.

**(S)-2-(((2'-Chloro-[1,1'-biphenyl]-4-yl)methyl)amino)propanamide (3d)**

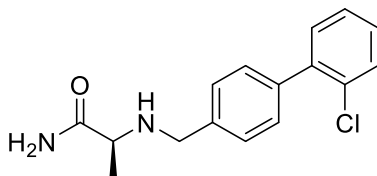

Using method B, L-alaninamide hydrochloride (0.16 g, 1.44 mmol), triethylamine (0.25 mL, 3.53 mmol), **2d** (0.26 g, 1.20 mmol) in MeOH (1.30 mL), and sodium cyanoborohydride (0.32 g, 4.80 mmol) in MeOH (1.20 mL) gave **3d** as a white solid 0.16 g, 47%);  $R_f = 0.15$  (EtOAc); mp 91–94 °C;  $^1\text{H NMR}$  (300 MHz,  $\text{DMSO-}d_6$ )  $\delta$  7.53–7.58 (m, 1ArH), 7.30–7.48 (m, 7ArH, C(O)NHH'), 6.98 (br s, C(O)NHH'), 3.60 and 3.74 (AB<sub>q</sub>,  $J = 13.6$  Hz, CH<sub>2</sub>), 3.06 (q,  $J = 6.8$  Hz, CH), 2.44 (br s, NH), 1.17 (d,  $J = 6.8$  Hz, CH<sub>3</sub>);  $^{13}\text{C NMR}$  (75 MHz,  $\text{DMSO-}d_6$ )  $\delta$  177.4 (C(O)), 140.7, 140.2, 137.5, 132.0, 131.8, 130.3, 129.5, 129.4, 128.2, 128.0 (ArC), 57.1 (CH), 51.2 (CH<sub>2</sub>), 19.9 (CH<sub>3</sub>).

**(S)-2-(((3'-Chloro-[1,1'-biphenyl]-4-yl)methyl)amino)propanamide (3e)**

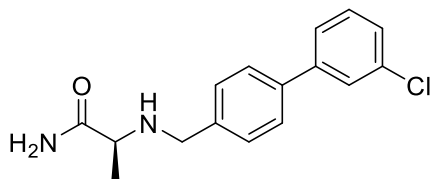

Using method B, L-alaninamide hydrochloride (0.21 g, 1.66 mmol), triethylamine (0.23 mL, 1.66 mmol), **2e** (0.30 g, 1.38 mmol), and sodium cyanoborohydride (0.13 g, 2.08 mmol) in MeOH (1.36 mL) gave **3e** as a white solid (0.22 mg, 54%);  $R_f = 0.10$  (EtOAc); mp 121–123 °C;  $^1\text{H}$  NMR (400 MHz, DMSO- $d_6$ )  $\delta$  7.70 (s, 1ArH), 7.62–7.65 (m, 3ArH), 7.48 (t,  $J = 7.8$  Hz, 1ArH), 7.40–7.48 (m, 3ArH), 7.34 (br s, C(O)NHH'), 6.99 (br s, C(O)NHH'), 3.59 and 3.74 (AB<sub>q</sub>,  $J = 13.7$  Hz, CH<sub>2</sub>), 3.03 (q,  $J = 6.7$  Hz, CH), 2.44 (br s, NH), 1.15 (d,  $J = 6.8$  Hz, CH<sub>3</sub>);  $^{13}\text{C}$  NMR (75 MHz, DMSO- $d_6$ )  $\delta$  177.4 (C(O)), 142.7, 141.1, 137.4, 134.2, 131.2, 129.0, 127.5, 127.0, 126.7, 125.7 (ArC), 57.0(CH), 51.1(CH<sub>2</sub>), 19.8 (CH<sub>3</sub>).

**(S)-2-(((4'-Chloro-[1,1'-biphenyl]-4-yl)methyl)amino)propanamide(3f)**

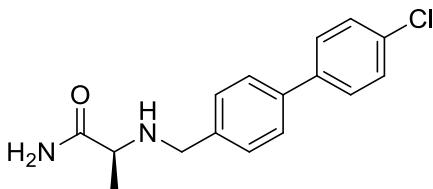

Using method B, L-alaninamide hydrochloride (0.35 g, 3.00 mmol), triethylamine (0.97 mL, 6.92 mmol), **2f** (0.50 g, 2.31 mmol) in MeOH (2.51 mL), and sodium cyanoborohydride (0.23 g, 3.46 mmol) in MeOH (2.31 mL) gave **3f** as a white solid (386 mg, 58%);  $R_f = 0.15$  (EtOAc); mp 166–164 °C;  $^1\text{H}$  NMR (300 MHz, DMSO- $d_6$ )  $\delta$  7.66–7.70 (m, 2ArH), 7.61 (d,  $J = 8.2$  Hz, 2ArH), 7.49–7.53 (m, 2ArH), 7.42 (d,  $J = 8.2$  Hz, 2ArH), 7.33 (br s, C(O)NHH'), 6.99 (br s, C(O)NHH'), 3.58 and 3.73 (AB<sub>q</sub>,  $J = 13.7$  Hz, CH<sub>2</sub>), 3.03 (q,  $J = 6.8$  Hz, CH), 2.43 (br s, NH), 1.08 (d,  $J = 6.7$  Hz, CH<sub>3</sub>);  $^{13}\text{C}$  NMR (75 MHz, DMSO- $d_6$ )  $\delta$  177.4 (C(O)), 140.8, 139.3, 137.6, 132.6, 129.3, 129.0, 128.7, 126.9 (ArC), 56.9 (CH), 51.1 (CH<sub>2</sub>), 19.8 (CH<sub>3</sub>).



**(S)-2-(((2'-(Trifluoromethyl)-[1,1'-biphenyl]-4-yl)methyl)amino)propanamide (3g)**

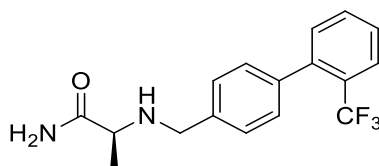

Using method D, L-alaninamide hydrochloride (**13**) (0.15 g, 1.34 mmol), triethylamine (0.23 mL, 1.68 mmol) **2g** (0.28 g, 1.11 mmol) in MeOH (1.22 mL) and sodium cyanoborohydride (0.30 g, 4.48 mmol) in MeOH (1.12 mL) gave **3g** as a white solid (0.17 g, 48%);  $R_f = 0.15$  (EtOAc); mp 109–111 °C;  $^1\text{H NMR}$  (400 MHz,  $\text{DMSO}-d_6$ )  $\delta$  7.82 (d,  $J = 7.6$  Hz, 1ArH), 7.70 (t,  $J = 7.6$  Hz, 1ArH), 7.59 (t,  $J = 7.6$  Hz, 1ArH), 7.32–7.45 (m, 3ArH, C(O)NHH'), 7.24 (d,  $J = 7.8$  Hz, 2ArH), 7.00 (br s, C(O)NHH'), 3.60 and 3.73 (AB<sub>q</sub>,  $J = 13.7$  Hz, CH<sub>2</sub>), 3.05 (q,  $J = 6.8$  Hz, CH), 2.48 (br s, NH), 1.16 (d,  $J = 6.8$  Hz, CH<sub>3</sub>);  $^{13}\text{C NMR}$  (75 MHz,  $\text{DMSO}-d_6$ )  $\delta$  177.4 (C(O)), 141.2, 140.7, 138.1, 132.7, 128.9, 128.4, 127.8, 127.3 (q,  $J_{\text{C-F}} = 29.0$  Hz), 126.4, 124.7 (q,  $J_{\text{C-F}} = 273.6$  Hz) (ArC), 57.2 (CH), 51.2 (CH<sub>2</sub>), 19.8 (CH<sub>3</sub>).

**(S)-2-(((3'-(Trifluoromethyl)-[1,1'-biphenyl]-4-yl)methyl)amino)propanamide (3h)**

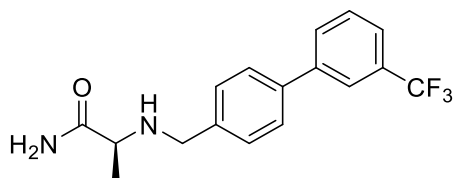

Using method B, L-alaninamide hydrochloride (2.11 g, 16.91 mmol), triethylamine (2.34 mL, 16.91 mmol), **2h** (3.30 g, 14.10 mmol), and sodium cyanoborohydride (1.40 g, 21.14 mmol) in MeOH (14.09 mL) gave **3h** as a white solid (1.15 g, 26%);  $R_f = 0.15$  (EtOAc); mp 106–108 °C;  $^1\text{H NMR}$  (400 MHz,  $\text{DMSO}-d_6$ )  $\delta$  7.94–7.99 (m, 2ArH), 7.69–7.71 (m, 4ArH), 7.45–7.47 (m, 2ArH), 7.36 (br s, C(O)NHH'), 7.02 (br s, C(O)NHH'), 3.60 and 3.75 (AB<sub>q</sub>,  $J = 13.8$  Hz, NHCH<sub>2</sub>Ar), 3.04 (q,  $J = 6.8$  Hz, CH), 1.16 (d,  $J = 6.8$  Hz, CH<sub>3</sub>);  $^{13}\text{C NMR}$  (75 MHz,  $\text{DMSO}-d_6$ )  $\delta$  177.5 (C(O)), 141.6, 141.3, 137.4, 131.0, 130.4, 130.3 (q,  $J_{\text{C-F}} = 31.2$  Hz), 129.1, 127.1, 124.7 (q,  $J_{\text{C-F}} = 270.8$  Hz), 124.2 (q,  $J_{\text{C-F}} = 3.6$  Hz), 123.3 (q,  $J_{\text{C-F}} = 3.7$  Hz) (ArC), 57.0 (CH), 51.1 (CH<sub>2</sub>), 19.8 (CH<sub>3</sub>).

**(S)-2-(((4'-(Trifluoromethyl)-[1,1'-biphenyl]-4-yl)methyl)amino)propanamide (3i)**

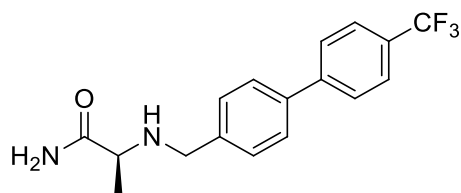

Using method B, L-alaninamide hydrochloride (0.30 g, 2.4 mmol), triethylamine (0.42 mL, 4.12 mmol), **2i** (0.50 g, 2.0 mmol) in MeOH (2.17 mL), and sodium cyanoborohydride (0.30 g, 3.0 mmol) in MeOH (2.0 mL) gave **3i** as a white solid (0.33 g, 53%);  $R_f = 0.10$  (EtOAc); mp 144–147 °C;  $^1\text{H NMR}$  (300 MHz,  $\text{DMSO}-d_6$ )  $\delta$  7.89 (d,  $J = 8.1$  Hz, 2ArH), 7.80 (d,  $J = 8.3$  Hz, 2ArH), 7.69 (d,  $J = 7.9$  Hz, 2ArH), 7.47 (d,  $J = 8.0$  Hz, 2ArH), 7.34 (br s, C(O)NHH'), 6.99 (br s, C(O)NHH'), 3.60 and 3.75 (ABq,  $J = 13.8$  Hz, CH<sub>2</sub>), 3.04 (q,  $J = 6.8$  Hz, CH), 1.15 (d,  $J = 6.8$  Hz, CH<sub>3</sub>), the remaining peak was not detected and is believed to overlap with H<sub>2</sub>O signals;  $^{13}\text{C NMR}$  (75 MHz,  $\text{DMSO}-d_6$ )  $\delta$  177.4 (C(O)), 144.5, 141.6, 137.4, 129.1, 128.1 (q,  $J_{\text{C-F}} = 31.8$  Hz), 127.7, 127.2, 126.2 (q,  $J_{\text{C-F}} = 3.8$  Hz), 124.8 (q,  $J_{\text{C-F}} = 270.1$  Hz) (ArC), 57.0 (CH), 51.1 (CH<sub>2</sub>), 19.8 (CH<sub>3</sub>).

**(S)-2-(((3'-(Trifluoromethoxy)-[1,1'-biphenyl]-4-yl)methyl)amino)propanamide (3j)**

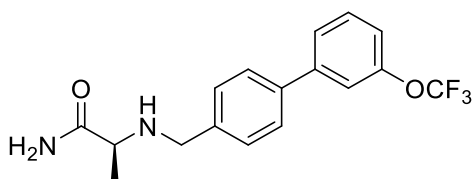

Using method B, L-alaninamide hydrochloride (0.28 g, 2.25 mmol), triethylamine (0.39 mL, 2.82 mmol), **2j** (0.50 g, 1.88 mmol) in MeOH (2.04 mL) and sodium cyanoborohydride (0.17 g, 2.57 mmol) in MeOH (1.71 mL) gave **3j** as a white solid (0.34 g, 54%);  $R_f = 0.10$  (EtOAc); mp 95–97 °C;  $^1\text{H NMR}$  (300 MHz,  $\text{DMSO}-d_6$ )  $\delta$  7.55–7.76 (m, 5ArH), 7.44 (d,  $J = 7.8$  Hz, 2ArH), 7.30–7.38 (m, 1ArH, C(O)NHH'), 6.99 (br s, C(O)NHH'), 3.59 and 3.74 (ABq,  $J = 13.7$  Hz, CH<sub>2</sub>), 3.03 (q,  $J = 6.8$  Hz, CH), 2.43 (br s, NH), 1.15 (d,  $J = 6.8$  Hz, CH<sub>3</sub>);  $^{13}\text{C NMR}$  (75 MHz,  $\text{CDCl}_3$ )  $\delta$  178.0 (C(O)), 149.8(COCF<sub>3</sub>), 142.9, 139.4, 138.7, 130.1 128.6, 127.3, 125.4, 120.6 (q,  $J_{\text{C-F}} = 255.7$  Hz), 119.6 (ArC), 57.7(CH), 52.2 (CH<sub>2</sub>), 19.7 (CH<sub>3</sub>).

**(S)-2-(((4'-(Trifluoromethoxy)-[1,1'-biphenyl]-4-yl)methyl)amino)propanamide (3k)**

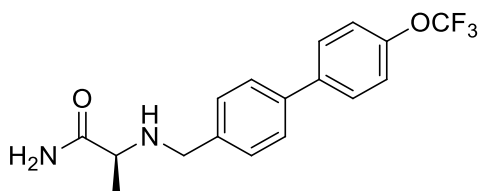

Using method B, L-alaninamide hydrochloride (0.23 g, 1.81 mmol), triethylamine (0.25 mL, 1.81 mmol), **2k** (0.40 g, 1.51 mmol) and sodium cyanoborohydride (0.15 g, 2.26 mmol) in MeOH (1.5 mL) gave compound **3k** as a white solid (0.32 g, 62%);  $R_f = 0.10$  (EtOAc); mp 129–132 °C;  $^1\text{H NMR}$  (400 MHz,  $\text{DMSO-}d_6$ )  $\delta$  7.78 (d,  $J = 8.6$  Hz, 2ArH), 7.63 (d,  $J = 8.0$  Hz, 2ArH), 7.41–7.53 (m, 4ArH), 7.34 (br s, C(O)NHH'), 7.00 (br s, C(O)NHH'), 3.59 and 3.73 (AB<sub>q</sub>,  $J = 13.7$  Hz, CH<sub>2</sub>), 2.98–3.11 (m, CH), 2.42 (br s, NH), 1.15 (d,  $J = 6.8$  Hz, CH<sub>3</sub>);  $^{13}\text{C NMR}$  (75 MHz,  $\text{CDCl}_3$ )  $\delta$  178.1 (C(O)), 148.7 (COCF<sub>3</sub>), 139.6, 139.1, 128.9, 128.6, 128.4, 127.3, 121.3, 120.6 (q,  $J_{\text{C-F}} = 255.4$  Hz) (ArC), 57.7 (CH), 52.2 (CH<sub>2</sub>), 19.7 (CH<sub>3</sub>).

**(S)-2-(((1,1'-Biphenyl)-4-ylmethyl)amino)propanamide methanesulfonate (KDS2051)**

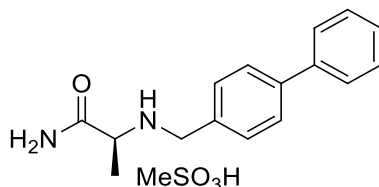

Using method E, to a solution of **24o** (0.15 g, 0.59 mmol), methanesulfonic acid (47.84  $\mu\text{L}$ , 0.74 mmol) in EtOAc (1.18 mL) gave **35o** as a white solid (0.18 g, 86%);  $R_f = 0.00$  ( $\text{CH}_2\text{Cl}_2/\text{MeOH}$  10/1); mp 252–256 °C; HPLC purity: 6.2 min, >99.9%;  $^1\text{H NMR}$  (300 MHz,  $\text{DMSO-}d_6$ )  $\delta$  9.19 (br s,  $^+\text{NH}_2$ ), 7.98 (br s, C(O)NHH'), 7.75 (d,  $J = 8.0$  Hz, 2ArH), 7.70 (d,  $J = 7.8$  Hz, 2ArH), 7.65 (br s, C(O)NHH'), 7.60 (d,  $J = 8.0$  Hz, 2ArH), 7.48 (t,  $J = 7.5$  Hz, 2ArH), 7.34–7.43 (m, 1ArH), 4.10–4.20 (m, CH<sub>2</sub>), 3.78–3.94 (m, CH), 2.37 (s, SCH<sub>3</sub>), 1.47 (d,  $J = 6.8$  Hz, CH<sub>3</sub>);  $^{13}\text{C NMR}$  (75 MHz,  $\text{DMSO-}d_6$ )  $\delta$  170.9 (C(O)), 141.2, 139.8, 131.3, 131.2, 129.5, 128.3, 127.3, 127.2 (ArC), 55.0 (CH), 48.6 (CH<sub>2</sub>), 40.2 (SCH<sub>3</sub>), 16.4 (CH<sub>3</sub>); HRMS ( $\text{M} + \text{H}$ )<sup>+</sup>(ESI<sup>+</sup>) 255.1500 [ $\text{M} + \text{H}$ ]<sup>+</sup> (calcd for  $\text{C}_{16}\text{H}_{18}\text{N}_2\text{OH}^+$  255.1497)

**(S)-2-(((2'-Fluorobiphenyl-4-yl)methyl)amino)propanamide methanesulfonate (KDS0011)**

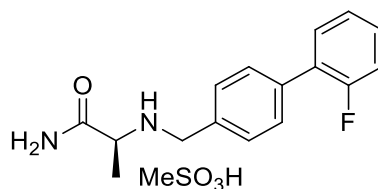

Using method C, **3a** (0.10 g, 0.37 mmol) and methanesulfonic acid (28.10  $\mu$ L, 0.43 mmol) in EtOAc (1.50 mL) gave **KDS0011** as a white solid (0.12 g, 90%);  $R_f = 0.00$  ( $\text{CH}_2\text{Cl}_2/\text{MeOH}$  10/1); mp 131–135  $^\circ\text{C}$ ; HPLC purity: 6.4 min, >99.9%;  $^1\text{H}$  NMR (300 MHz,  $\text{DMSO}-d_6$ )  $\delta$  9.17 (br s,  $^+\text{NH}_2$ ), 7.94 (br s,  $\text{C}(\text{O})\text{NHH}'$ ), 7.30–7.94 (m, 8ArH,  $\text{C}(\text{O})\text{NHH}'$ ), 4.08–4.25 (m,  $\text{CH}_2$ ), 3.80 (q,  $J = 6.7$  Hz, CH), 2.30 (s,  $\text{SCH}_3$ ), 1.45 (d,  $J = 6.7$  Hz,  $\text{CH}_3$ );  $^{13}\text{C}$  NMR (75 MHz,  $\text{DMSO}-d_6$ )  $\delta$  170.9 ( $\text{C}(\text{O})$ ), 159.5 (d,  $J_{\text{C-F}} = 244.6$  Hz), 136.2, 131.7, 131.2 (d,  $J_{\text{C-F}} = 3.1$  Hz), 130.8, 130.4 (d,  $J_{\text{C-F}} = 5.4$  Hz), 129.5 (d,  $J_{\text{C-F}} = 2.7$  Hz), 128.0 (d,  $J_{\text{C-F}} = 13.0$  Hz), 125.5 (d,  $J_{\text{C-F}} = 3.4$  Hz), 116.6 (d,  $J_{\text{C-F}} = 22.3$  Hz) (ArC), 55.1 (CH), 48.7 ( $\text{CH}_2$ ), 16.4 ( $\text{CH}_3$ ), the  $\text{SCH}_3$  peak was overlapped with the DMSO signals; HRMS ( $\text{M} + \text{H}$ ) $^+$ (ESI $^+$ ) 237.1399 [ $\text{M} + \text{H}$ ] $^+$  (calcd for  $\text{C}_{16}\text{H}_{17}\text{FN}_2\text{OH}^+$  237.1403)

**(S)-2-(((3'-Fluorobiphenyl-4-yl)methyl)amino)propanamide methanesulfonate (KDS0015)**

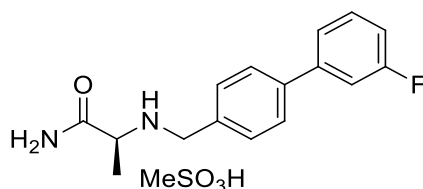

Using method C, **3b** (0.30 g, 1.10 mmol) and methanesulfonic acid (89.36  $\mu$ L, 1.38 mmol) in EtOAc (2.50 mL) gave **KDS0015** as a white solid (0.39 g, 97%);  $R_f = 0.00$  ( $\text{CH}_2\text{Cl}_2/\text{MeOH}$  10/1); mp 235–238  $^\circ\text{C}$ ; HPLC purity: 6.4 min, >99.9%;  $^1\text{H}$  NMR (300 MHz,  $\text{DMSO}-d_6$ )  $\delta$  9.15 (br s,  $^+\text{NH}_2$ ), 7.92 (br s,  $\text{C}(\text{O})\text{NHH}'$ ), 7.81 (d,  $J = 8.3$  Hz, 2ArH), 7.68 (br s,  $\text{C}(\text{O})\text{NHH}'$ ), 7.49–7.60 (m, 5ArH), 7.21–7.27 (m, 1ArH), 7.24 (m, 1ArH), 4.11–4.20 (m,  $\text{CH}_2$ ), 3.76 (q,  $J = 9.3$  Hz, CH), 2.30 (s,  $\text{SCH}_3$ ), 1.44 (d,  $J = 9.3$  Hz,  $\text{CH}_3$ );  $^{13}\text{C}$  NMR (75 MHz,  $\text{DMSO}-d_6$ )  $\delta$  171.0 ( $\text{C}(\text{O})$ ), 163.2 (d,  $J_{\text{C-F}} = 241.9$  Hz), 142.3, 139.8, 132.0, 131.5 (d,  $J_{\text{C-F}} = 8.7$  Hz), 131.2, 127.5, 123.3, 115.0 (d,  $J_{\text{C-F}} = 21.1$  Hz), 113.9 (d,  $J_{\text{C-F}} = 21.9$  Hz) (ArC), 55.0 (CH), 48.6 ( $\text{CH}_2$ ), 16.4 ( $\text{CH}_3$ ), the  $\text{SCH}_3$  peak was overlapped with the DMSO signals; HRMS ( $\text{M} + \text{H}$ ) $^+$ (ESI $^+$ ) 273.1401 [ $\text{M} + \text{H}$ ] $^+$  (calcd for  $\text{C}_{16}\text{H}_{17}\text{FN}_2\text{OH}^+$  273.1403)

**(S)-2-(((4'-Fluorobiphenyl-4-yl)methyl)amino)propanamide methanesulfonate (KDS2006)**

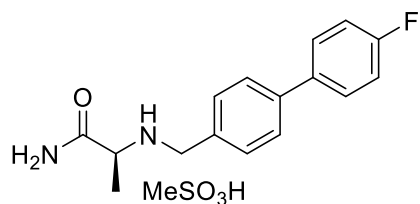

Using method C, **3c** (0.20 g, 0.73 mmol) and methanesulfonic acid (59.58  $\mu$ L, 0.92 mmol) in EtOAc (1.46 mL) gave **KDS2006** as a white solid (0.24 g, 88%);  $R_f = 0.00$  ( $\text{CH}_2\text{Cl}_2/\text{MeOH}$  10/1); mp 162–164  $^\circ\text{C}$ ; HPLC purity: 6.4 min, 97.6%;  $^1\text{H}$  NMR (300 MHz,  $\text{DMSO}-d_6$ )  $\delta$  9.18 (br s,  $^+\text{NH}_2$ ), 7.95 (br s,  $\text{C}(\text{O})\text{NHH}'$ ), 7.72–7.77 (m, 4ArH), 7.65 (br s,  $\text{C}(\text{O})\text{NHH}'$ ), 7.58 (d,  $J = 8.2$  Hz, 2ArH), 7.28–7.34 (m, 2ArH), 4.12–4.15 (m,  $\text{CH}_2$ ), 3.78–3.84 (m, CH), 2.37 (s,  $\text{SCH}_3$ ), 1.45 (d,  $J = 6.9$  Hz,  $\text{CH}_3$ );  $^{13}\text{C}$  NMR (75 MHz,  $\text{DMSO}-d_6$ )  $\delta$  171.0 ( $\text{C}(\text{O})$ ), 140.2, 136.3 (d,  $J_{\text{C-F}} = 3.1$  Hz), 131.2, 131.1, 129.2 (d,  $J_{\text{C-F}} = 8.2$  Hz), 127.3, 116.3 (d,  $J_{\text{C-F}} = 21.2$  Hz) (ArC), 54.9 (CH), 48.5 ( $\text{CH}_2$ ), 16.3 ( $\text{CH}_3$ ), the  $\text{SCH}_3$  peak was overlapped with the DMSO signals; HRMS ( $\text{M} + \text{H}$ ) $^+$ (ESI $^+$ ) 273.1399 [ $\text{M} + \text{H}$ ] $^+$  (calcd for  $\text{C}_{16}\text{H}_{17}\text{FN}_2\text{OH}^+$  273.1403)

**(S)-2-(((2'-Chlorobiphenyl-4-yl)methyl)amino)propanamide methanesulfonate (KDS2042)**

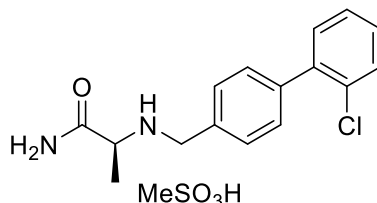

Using method C, **3d** (0.10 g, 0.35 mmol) and methanesulfonic acid (28.10  $\mu$ L, 0.43 mmol) in EtOAc (3.46 mL) gave **KDS2042** as a white solid (0.08 g, 63%);  $R_f = 0.00$  ( $\text{CH}_2\text{Cl}_2/\text{MeOH}$  10/1); mp 216–220  $^\circ\text{C}$ ; HPLC purity: 6.7 min, 97.8%;  $^1\text{H}$  NMR (300 MHz,  $\text{DMSO}-d_6$ )  $\delta$  9.18 (br s,  $^+\text{NH}_2$ ), 7.96 (br s,  $\text{C}(\text{O})\text{NHH}'$ ), 7.67 (br s,  $\text{C}(\text{O})\text{NHH}'$ ), 7.59 (d,  $J = 8.1$  Hz, 3ArH), 7.52 (d,  $J = 8.2$  Hz, 2ArH), 7.39–7.47 (m, 3ArH), 4.09–4.28 (m,  $\text{CH}_2$ ), 3.86–3.90 (m, CH), 2.30 (s,  $\text{SCH}_3$ ), 1.47 (d,  $J = 6.9$  Hz,  $\text{CH}_3$ );  $^{13}\text{C}$  NMR (75 MHz,  $\text{DMSO}-d_6$ )  $\delta$  170.9 ( $\text{C}(\text{O})$ ), 139.8, 139.6, 131.9, 131.8, 131.7, 130.4, 130.0, 128.1, 55.2 (CH), 48.7 ( $\text{CH}_2$ ), 16.4 ( $\text{CH}_3$ ), the  $\text{SCH}_3$  peak was overlapped with the DMSO signals. The remaining peak was not detected and is believed to overlap with the observed signals; HRMS ( $\text{M} + \text{H}$ ) $^+$ (ESI $^+$ ) 289.1105 [ $\text{M} + \text{H}$ ] $^+$  (calcd for  $\text{C}_{16}\text{H}_{17}\text{ClN}_2\text{OH}^+$  289.1108)

**(S)-2-(((3'-Chlorobiphenyl-4-yl)methyl)amino)propanamide methanesulfonate (KDS0014)**

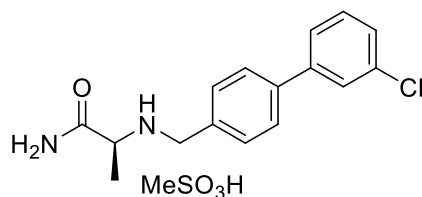

Using method C, **3e** (0.15 g, 0.52 mmol) and methanesulfonic acid (48.90  $\mu\text{L}$ , 0.75 mmol) in EtOAc (0.52 mL) gave **KDS0014** as a white solid (0.18 g, 90%);  $R_f = 0.00$  ( $\text{CH}_2\text{Cl}_2/\text{MeOH}$  10/1); mp 220–223  $^\circ\text{C}$ ; HPLC purity: 6.9 min, 97.3%;  $^1\text{H}$  NMR (400 MHz,  $\text{DMSO}-d_6$ )  $\delta$  9.16 (br s,  $^+\text{NH}_2$ ), 7.92 (br s,  $\text{C}(\text{O})\text{NHH}'$ ), 7.81 (d,  $J = 8.14$  Hz, 2ArH), 7.77 (br s,  $\text{C}(\text{O})\text{NHH}'$ ), 7.67–7.70 (m, 2ArH), 7.59 (d,  $J = 8.1$  Hz, 1ArH), 7.52 (t,  $J = 7.9$  Hz, 1ArH), 7.46 (d,  $J = 8.1$  Hz, 1ArH), 4.12–4.20 (m,  $\text{CH}_2$ ), 3.78 (q,  $J = 6.7$  Hz, CH), 2.30 (s,  $\text{SCH}_3$ ), 1.45 (d,  $J = 6.7$  Hz,  $\text{CH}_3$ );  $^{13}\text{C}$  NMR (75 MHz,  $\text{DMSO}-d_6$ )  $\delta$  170.9 ( $\text{C}(\text{O})$ ), 141.9, 139.5, 134.3, 132.0, 131.3, 131.2, 128.1, 127.5, 126.9, 125.9 (ArC), 55.1 (CH), 48.6 ( $\text{CH}_2$ ), 16.4 ( $\text{CH}_3$ ), the  $\text{SCH}_3$  peak was overlapped with the DMSO signals; HRMS ( $\text{M} + \text{H}$ ) $^+$ (ESI $^+$ ) 289.1106 [ $\text{M} + \text{H}$ ] $^+$  (calcd for  $\text{C}_{16}\text{H}_{17}\text{ClN}_2\text{OH}^+$  289.1108)

**(S)-2-(((4'-Chlorobiphenyl-4-yl)methyl)amino)propanamide methanesulfonate (KDS2005)**

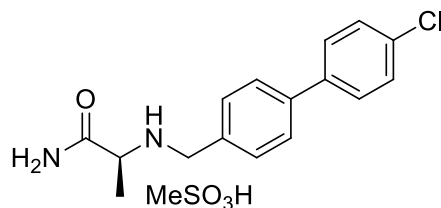

Using method C, **3f** (0.15 g, 0.52 mmol) and methanesulfonic acid (42.14  $\mu\text{L}$ , 0.65 mmol) in EtOAc (1.04 mL) gave **KDS2005** as a white solid (0.17 g, 84%);  $R_f = 0.00$  ( $\text{CH}_2\text{Cl}_2/\text{MeOH}$  10/1); mp 220–223  $^\circ\text{C}$ ; HPLC purity: 7.0 min, 98.2%;  $^1\text{H}$  NMR (300 MHz,  $\text{DMSO}-d_6$ )  $\delta$  9.17 (br s,  $^+\text{NH}_2$ ), 7.94 (br s,  $\text{C}(\text{O})\text{NHH}'$ ), 7.73–7.78 (m, 4ArH), 7.66 (br s,  $\text{C}(\text{O})\text{NHH}'$ ), 7.53–7.60 (m, 4ArH), 4.10–4.20 (m,  $\text{CH}_2$ ), 3.76–3.82 (m, CH), 2.32 (s,  $\text{SCH}_3$ ), 1.45 (d,  $J = 6.9$  Hz,  $\text{CH}_3$ );  $^{13}\text{C}$  NMR (100 MHz,  $\text{DMSO}-d_6$ )  $\delta$  170.9 ( $\text{C}(\text{O})$ ), 139.9, 138.6, 133.2, 131.7, 131.2, 129.4, 129.0, 127.3 (ArC), 54.9, (CH), 48.5 ( $\text{CH}_2$ ), 16.3 ( $\text{CH}_3$ ), the  $\text{SCH}_3$  peak was overlapped with the DMSO signals; HRMS ( $\text{M} + \text{H}$ ) $^+$ (ESI $^+$ ) 289.1109 [ $\text{M} + \text{H}$ ] $^+$  (calcd for  $\text{C}_{16}\text{H}_{17}\text{ClN}_2\text{OH}^+$  289.1108)

**(S)-2-(((2'-Trifluoromethylbiphenyl-4-yl)methyl)amino)propanamide methanesulfonate  
(KDS2041)**

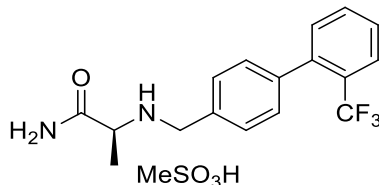

Using method C, **3g** (0.12 g, 0.37 mmol) and methanesulfonic acid (30.20  $\mu$ L, 0.47 mmol) in EtOAc (3.72 mL) gave **KDS2041** as a white solid (0.14 g, 87%);  $R_f = 0.00$  ( $\text{CH}_2\text{Cl}_2/\text{MeOH}$  10/1); mp 224–227  $^\circ\text{C}$ ; HPLC purity: 7.0 min, 95.8%;  $^1\text{H}$  NMR (300 MHz,  $\text{DMSO}-d_6$ )  $\delta$  9.20 (br s,  $^+\text{NH}_2$ ), 7.94 (br s,  $\text{C}(\text{O})\text{NHH}'$ ), 7.85 (d,  $J = 7.8$  Hz, 1ArH), 7.75 (t,  $J = 7.4$  Hz, 1ArH), 7.61–7.67 (m, 2ArH), 7.57 (d,  $J = 7.2$  Hz, 1ArH), 7.39–7.41 (m, 2ArH,  $\text{C}(\text{O})\text{NHH}'$ ), 4.11–4.22 (m,  $\text{CH}_2$ ), 3.86–3.88 (m, CH), 2.32 (s,  $\text{SCH}_3$ ), 1.47 (d,  $J = 6.7$  Hz,  $\text{CH}_3$ );  $^{13}\text{C}$  NMR (75 MHz,  $\text{DMSO}-d_6$ )  $\delta$  170.9 ( $\text{C}(\text{O})$ ), 140.5, 140.4, 132.8, 132.5, 131.9, 130.1, 129.4, 128.7, 127.3 (q,  $J_{\text{C-F}} = 29.2$  Hz), 126.5 (q,  $J_{\text{C-F}} = 5.2$  Hz), 124.6 (q,  $J_{\text{C-F}} = 270.5$  Hz), 55.4, (CH), 48.8 ( $\text{CH}_2$ ), 40.2 ( $\text{SCH}_3$ ), 16.4 ( $\text{CH}_3$ ); HRMS ( $\text{M} + \text{H}$ ) $^+$ (ESI $^+$ ) 323.1368 [ $\text{M} + \text{H}$ ] $^+$  (calcd for  $\text{C}_{17}\text{H}_{17}\text{F}_3\text{N}_2\text{OH}^+$  323.1371)

**(S)-2-(((3'-Trifluoromethylbiphenyl-4-yl)methyl)amino)propanamide methanesulfonate  
(KDS0012)**

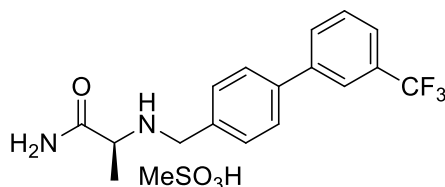

Using method C, **3h** (0.09 g, 0.28 mmol) and methanesulfonic acid (25.94  $\mu$ L, 0.40 mmol) in EtOAc (1.10 mL) gave **KDS0012** as a white solid (0.10 g, 92%);  $R_f = 0.00$  ( $\text{CH}_2\text{Cl}_2/\text{MeOH}$  10/1); mp 215–217  $^\circ\text{C}$ ; HPLC purity: 7.3 min, >99.9%;  $^1\text{H}$  NMR (400 MHz,  $\text{DMSO}-d_6$ )  $\delta$  9.16 (br s,  $^+\text{NH}_2$ ), 7.98–8.02 (m, 2ArH), 7.90 (br s,  $\text{C}(\text{O})\text{NHH}'$ ), 7.84 (d,  $J = 8.1$  Hz, 2ArH), 7.69–7.76 (m, 2ArH), 7.65 (br s,  $\text{C}(\text{O})\text{NHH}'$ ), 7.59 (d,  $J = 8.1$  Hz, 2ArH), 4.14 (m,  $\text{CH}_2$ ), 3.69–3.84 (m, CH), 2.27 (s,  $\text{SCH}_3$ ), 1.43 (d,  $J = 6.9$  Hz,  $\text{CH}_3$ );  $^{13}\text{C}$  NMR (75 MHz,  $\text{DMSO}-d_6$ )  $\delta$  171.0 ( $\text{C}(\text{O})$ ), 140.9, 139.5, 132.2, 131.3, 130.6, 130.3 (q,  $J_{\text{C-F}} = 31.4$  Hz), 127.6, 124.8, 124.6 (q,  $J_{\text{C-F}} = 270.7$  Hz), 123.5 (q,  $J_{\text{C-F}} = 3.6$  Hz) (ArC), 55.2 (CH), 48.6 ( $\text{CH}_2$ ), 16.4 ( $\text{CH}_3$ ). The  $\text{SCH}_3$  peak was overlapped with the DMSO signals. The remaining peak was not detected and is believed to

overlap with the observed signals; HRMS ( $M + H$ )<sup>+</sup>(ESI<sup>+</sup>) 323.1373 [ $M + H$ ]<sup>+</sup> (calcd for C<sub>17</sub>H<sub>17</sub>F<sub>3</sub>N<sub>2</sub>OH<sup>+</sup> 323.1371)

**(S)-2-(((4'-Trifluoromethylbiphenyl-4-yl)methyl)amino)propanamide methanesulfonate (KDS2010)**

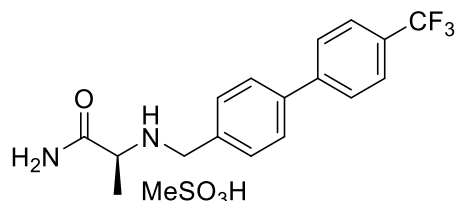

Using method C, **3i** (1.12 g, 3.63 mmol) and methanesulfonic acid (295.00  $\mu$ L, 1.25 mmol) in EtOAc (7.26 mL) gave **KDS2010** as a white solid (1.26 g, 83%, 9:1 enantiomeric mixture);  $R_f$  = 0.00 (CH<sub>2</sub>Cl<sub>2</sub>/MeOH 10/1); mp 241–243 °C; HPLC purity: 7.4 min, 99.7%; <sup>1</sup>H NMR (300 MHz, DMSO-*d*<sub>6</sub>)  $\delta$  9.20 (br s, <sup>+</sup>NH<sub>2</sub>), 7.94 (d,  $J$  = 7.7 Hz, 2ArH, C(O)NHH'), 7.83–7.86 (m, 4ArH), 7.63–7.66 (m, 2ArH, C(O)NHH'), 4.12–4.23 (m, CH<sub>2</sub>), 3.82 (q,  $J$  = 6.4 Hz, CH), 2.33 (s, SCH<sub>3</sub>), 1.46 (d,  $J$  = 6.4 Hz, CH<sub>3</sub>); <sup>13</sup>C NMR (75 MHz, DMSO-*d*<sub>6</sub>)  $\delta$  170.9 (C(O)), 143.8, 139.6, 132.4, 131.3, 128.6 (q,  $J_{C-F}$  = 31.9 Hz), 128.0, 127.8, 126.3 (q,  $J_{C-F}$  = 3.8 Hz), 124.8 (q,  $J_{C-F}$  = 270.3 Hz) (ArC), 55.0 (C(O)CH<sup>+</sup>NH<sub>2</sub>), 48.5 (CH<sub>2</sub>), 40.2 (SCH<sub>3</sub>), 16.4 (CH<sub>3</sub>); HRMS ( $M + H$ )<sup>+</sup>(ESI<sup>+</sup>) 323.1374 [ $M + H$ ]<sup>+</sup> (calcd for C<sub>17</sub>H<sub>17</sub>F<sub>3</sub>N<sub>2</sub>OH<sup>+</sup> 323.1371)

**(S)-2-(((3'-Trifluoromethoxybiphenyl-4-yl)methyl)amino)propanamide methanesulfonate (KDS2002)**

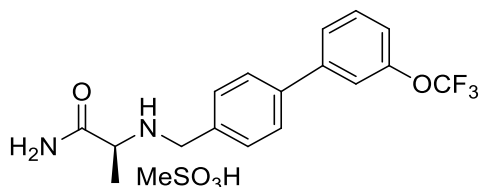

Using method C, **3j** (0.25 g, 0.74 mmol) and methanesulfonic acid (59.94  $\mu$ L, 0.92 mmol) in EtOAc (1.48 mL) gave **KDS2002** as a white solid (0.29 g, 90%);  $R_f$  = 0.00 (CH<sub>2</sub>Cl<sub>2</sub>/MeOH 10/1); mp 209–212 °C; HPLC purity: 7.5 min, 98.8%; <sup>1</sup>H NMR (300 MHz, DMSO-*d*<sub>6</sub>)  $\delta$  9.16 (br s, <sup>+</sup>NH<sub>2</sub>), 7.92 (br s, C(O)NHH'), 7.83 (d,  $J$  = 8.2 Hz, 2ArH), 7.77 (d,  $J$  = 8.2 Hz, 1ArH), 7.59–7.69 (m, 4ArH, C(O)NHH'), 7.39–7.42 (m, 1ArH), 4.08–4.23 (m, CH<sub>2</sub>), 3.77 (q,  $J$  = 7.0 Hz, CH), 2.30 (s, SCH<sub>3</sub>), 1.44 (d,  $J$  = 7.0 Hz, CH<sub>3</sub>); <sup>13</sup>C NMR (100 MHz, DMSO-*d*<sub>6</sub>)  $\delta$  170.9



(C(O)), 149.5, 142.2, 139.4, 132.2, 131.5, 131.2, 127.6, 126.3, 120.6 (q,  $J_{C-F} = 254.7$  Hz), 120.5, 119.7 (ArC), 55.0, (CH), 48.5 (CH<sub>2</sub>), 16.4 (CH<sub>3</sub>), the SCH<sub>3</sub> peak was overlapped with the DMSO signals; HRMS (M + H)<sup>+</sup>(ESI<sup>+</sup>) 339.1322 [M + H]<sup>+</sup> (calcd for C<sub>17</sub>H<sub>17</sub>F<sub>3</sub>N<sub>2</sub>O<sub>2</sub>H<sup>+</sup> 339.1320)

**(S)-2-(((4'-Trifluoromethoxybiphenyl-4-yl)methyl)amino)propanamide methanesulfonate (KDS2001)**

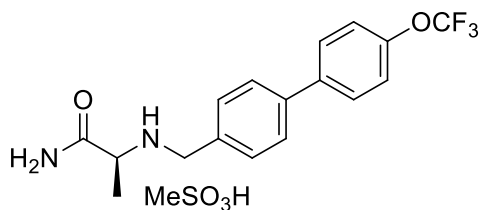

Using method C, **3k** (0.10 g, 0.30 mmol) and methanesulfonic acid (23.98  $\mu$ L, 0.37 mmol) in EtOAc (0.59 mL) gave **KDS2001** as a white solid (0.12 g, 92%);  $R_f = 0.00$  (CH<sub>2</sub>Cl<sub>2</sub>/MeOH 10/10); mp 256–259 °C; HPLC purity: 7.6 min, 99.8%; <sup>1</sup>H NMR (400 MHz, DMSO-*d*<sub>6</sub>)  $\delta$  9.17 (br s, <sup>+</sup>NH<sub>2</sub>), 7.92 (br s, C(O)NHH'), 7.83 (d,  $J = 8.7$  Hz, 2ArH), 7.78 (d,  $J = 8.2$  Hz, 2ArH), 7.67 (br s, C(O)NHH'), 7.59 (d,  $J = 8.1$  Hz, 2ArH), 7.48 (d,  $J = 8.2$  Hz, 2ArH), 4.08–4.23 (m, CH<sub>2</sub>), 3.71–3.88 (m, CH), 2.30 (s, SCH<sub>3</sub>), 1.44 (d,  $J = 7.0$  Hz, CH<sub>3</sub>); <sup>13</sup>C NMR (100 MHz, DMSO-*d*<sub>6</sub>)  $\delta$  170.9 (C(O)), 148.5, 139.7, 139.1, 131.8, 129.1, 127.5, 122.0, 120.6 (q,  $J_{C-F} = 254.7$  Hz) (ArC), 55.0 (CH), 48.6 (CH<sub>2</sub>), 16.4 (CH<sub>3</sub>), the SCH<sub>3</sub> peak was overlapped with the DMSO signals; HRMS (M + H)<sup>+</sup>(ESI<sup>+</sup>) 339.1316 [M + H]<sup>+</sup> (calcd for C<sub>17</sub>H<sub>17</sub>F<sub>3</sub>N<sub>2</sub>O<sub>2</sub>H<sup>+</sup> 339.1320)

**(R)-2-(((4'-(Trifluoromethyl)-[1,1'-biphenyl]-4-yl)methyl)amino)propanamide (25b)**

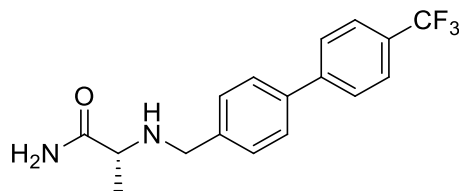

Using method D, D-alaninamide hydrochloride (**14**) (0.15 g, 1.20 mmol), triethylamine (0.21 mL, 1.50 mmol) **2b** (0.25 g, 1.00 mmol) in MeOH (1.09 mL) and sodium cyanoborohydride (0.26 g, 4.00 mmol) in MeOH (1.00 mL) gave **25b** as a white solid (0.21 g, 64%);  $R_f = 0.10$  (EtOAc); mp 143–145 °C; <sup>1</sup>H NMR (300 MHz, DMSO-*d*<sub>6</sub>)  $\delta$  7.89 (d,  $J = 8.3$  Hz, 2ArH), 7.80 (t,  $J = 8.3$  Hz,

2ArH), 7.69 (d,  $J = 8.1$  Hz, 2ArH), 7.47 (d,  $J = 8.1$  Hz, 2ArH), 7.35 (br s, C(O)NHH'), 7.00 (br s, C(O)NHH'), 3.60 and 3.75 (AB<sub>q</sub>,  $J = 13.8$  Hz, NHCH<sub>2</sub>Ar), 3.03 (q,  $J = 6.8$  Hz, CH), 2.44 (br s, NH), 1.15 (d,  $J = 6.8$  Hz, CH<sub>3</sub>); <sup>13</sup>C NMR (75 MHz, CDCl<sub>3</sub>)  $\delta$  177.9 (C(O)), 144.3, 139.7, 138.8, 129.4 (q,  $J_{C-F} = 32.3$  Hz), 128.6, 127.5, 127.3, 125.8 (q,  $J_{C-F} = 3.7$  Hz), 124.3 (q,  $J_{C-F} = 270.1$  Hz) (ArC), 57.7 (CH), 52.2 (CH<sub>2</sub>), 19.7 (CH<sub>3</sub>).

**(R)-2-(((4'-(Trifluoromethylbiphenyl-4-yl)methyl)amino)propanamide methanesulfonate (KDS2029)(R-isomer of KDS2010)**

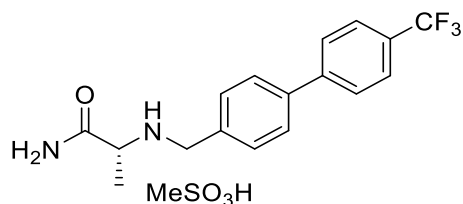

Using method B, D-alaninamide hydrochloride (0.15 g, 1.20 mmol, > 95% optical purity), triethylamine (0.21 mL, 1.50 mmol) **2i** (0.25 g, 1.00 mmol) in MeOH (1.09 mL) and sodium cyanoborohydride (0.26 g, 4.00 mmol) in MeOH (1.00 mL) gave free form of KDS2029 as a white solid (0.21 g, 64%, 9:1 enantiomeric mixture);  $R_f = 0.10$  (EtOAc); mp 143–145 °C; <sup>1</sup>H NMR (300 MHz, DMSO-*d*<sub>6</sub>)  $\delta$  7.89 (d,  $J = 8.3$  Hz, 2ArH), 7.80 (t,  $J = 8.3$  Hz, 2ArH), 7.69 (d,  $J = 8.1$  Hz, 2ArH), 7.47 (d,  $J = 8.1$  Hz, 2ArH), 7.35 (br s, C(O)NHH'), 7.00 (br s, C(O)NHH'), 3.60 and 3.75 (AB<sub>q</sub>,  $J = 13.8$  Hz, NHCH<sub>2</sub>Ar), 3.03 (q,  $J = 6.8$  Hz, CH), 2.44 (br s, NH), 1.15 (d,  $J = 6.8$  Hz, CH<sub>3</sub>); <sup>13</sup>C NMR (75 MHz, CDCl<sub>3</sub>)  $\delta$  177.9 (C(O)), 144.3, 139.7, 138.8, 129.4 (q,  $J_{C-F} = 32.3$  Hz), 128.6, 127.5, 127.3, 125.8 (q,  $J_{C-F} = 3.7$  Hz), 124.3 (q,  $J_{C-F} = 270.1$  Hz) (ArC), 57.7 (CH), 52.2 (CH<sub>2</sub>), 19.7 (CH<sub>3</sub>).

Using method C, the resulting solid (0.17 g, 0.53 mmol), methanesulfonic acid (42.80  $\mu$ L, 0.66 mmol) in EtOAc (1.05 mL) gave KDS2029 as a white solid (0.19 g, 87%);  $R_f = 0.00$  (CH<sub>2</sub>Cl<sub>2</sub>/MeOH 10/1); mp 241–244 °C; HPLC purity: 7.4 min, 99.8%; <sup>1</sup>H NMR (300 MHz, DMSO-*d*<sub>6</sub>)  $\delta$  9.18 (br s, <sup>+</sup>NH<sub>2</sub>), 7.93–7.95 (m, 2ArH, C(O)NHH'), 7.84 (d,  $J = 7.9$  Hz, 4ArH), 7.62–7.66 (m, 2ArH, C(O)NHH'), 4.12–4.22 (m, CH<sub>2</sub>), 3.80 (q,  $J = 6.5$  Hz, CH), 2.31 (s, SCH<sub>3</sub>), 1.45 (d,  $J = 6.5$  Hz, CH<sub>3</sub>); <sup>13</sup>C NMR (75 MHz, DMSO-*d*<sub>6</sub>)  $\delta$  170.9 (C(O)), 143.8, 139.5, 132.4, 131.3, 128.6 (q,  $J_{C-F} = 31.7$  Hz) (ArC), 55.1 (CH), 48.6 (CH<sub>2</sub>), 40.2 (SCH<sub>3</sub>), 16.4 (CH<sub>3</sub>); HRMS (M + H)<sup>+</sup>(ESI<sup>+</sup>) 323.1373 [M + H]<sup>+</sup> (calcd for C<sub>17</sub>H<sub>17</sub>F<sub>3</sub>N<sub>2</sub>OH<sup>+</sup> 323.1371)

### **Chiral resolution of KDS2010**

Analytical resolution was carried out using a SHIMADZU NEXERA supercritical fluid chromatography (SFC) system with LC-30AD SF CO<sub>2</sub> and LC-20AD LC pump, a SPD-M20A diode array detector connected to a SFC-30A back pressure regulator. 1 μL of the desired racemate (5 mg/1 mL MeOH) were injected on a DAICEL chiralpak AD-H 5 μm column 150 × 4.6 mm. The sample was eluted with CO<sub>2</sub>:MeOH:DEA (80:20:1) with a flowrate of 3 mL/min at 25 °C. Retention time (RT) of the separated enantiomers of **KDS2010**: *S*) 2.59 min *R*) 2.84 min.

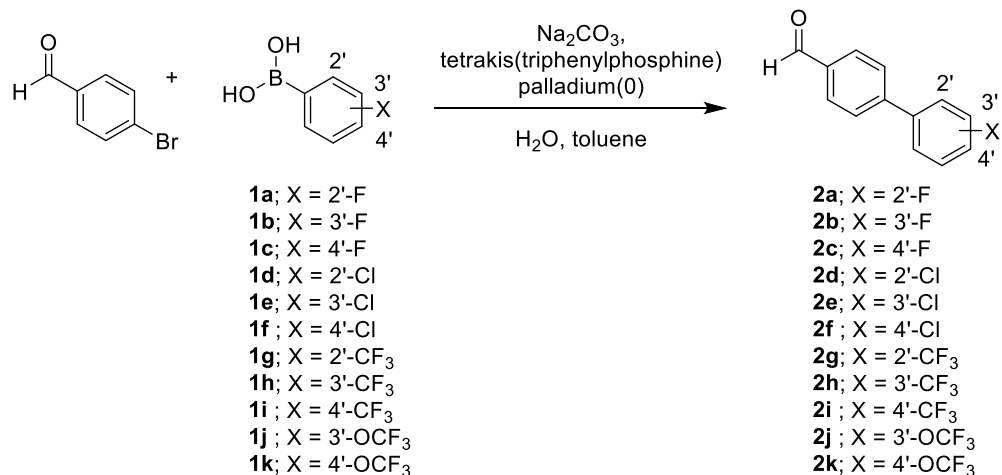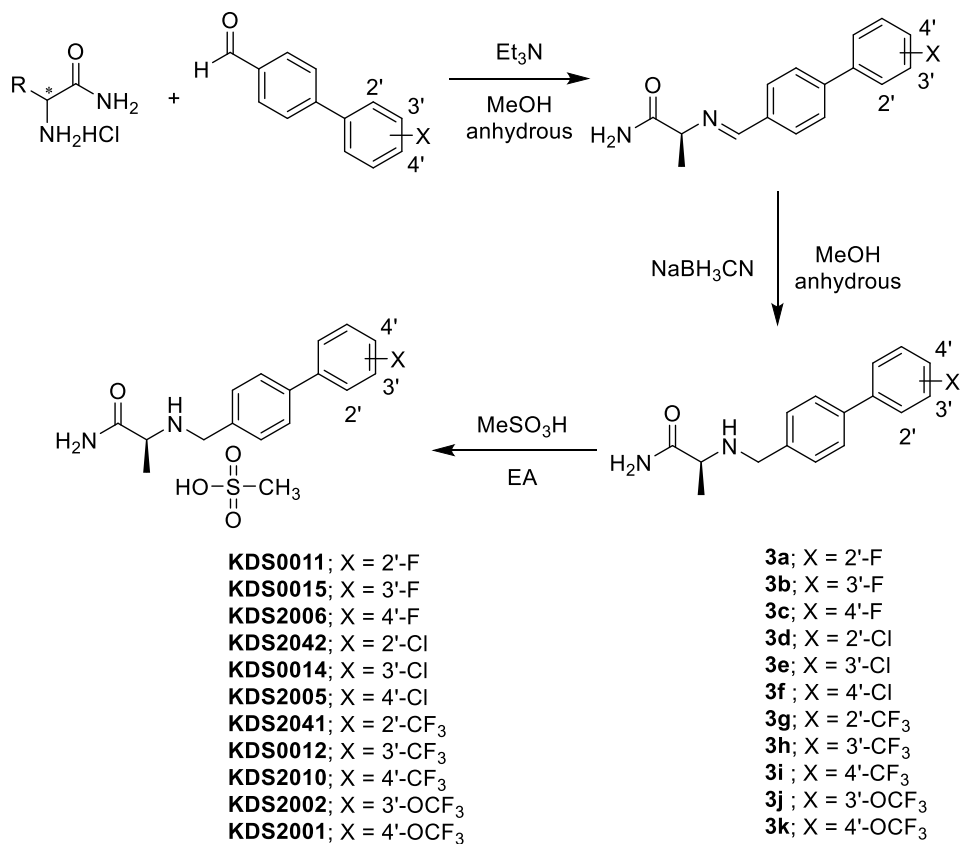

**Fig. S1. General procedure for the preparation of KDS compounds.**

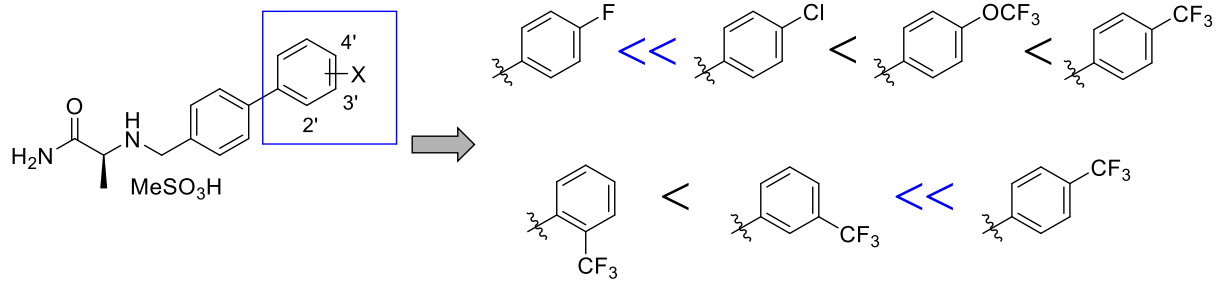

**Fig. S2. Structure-activity relationship of the synthesized compounds.**

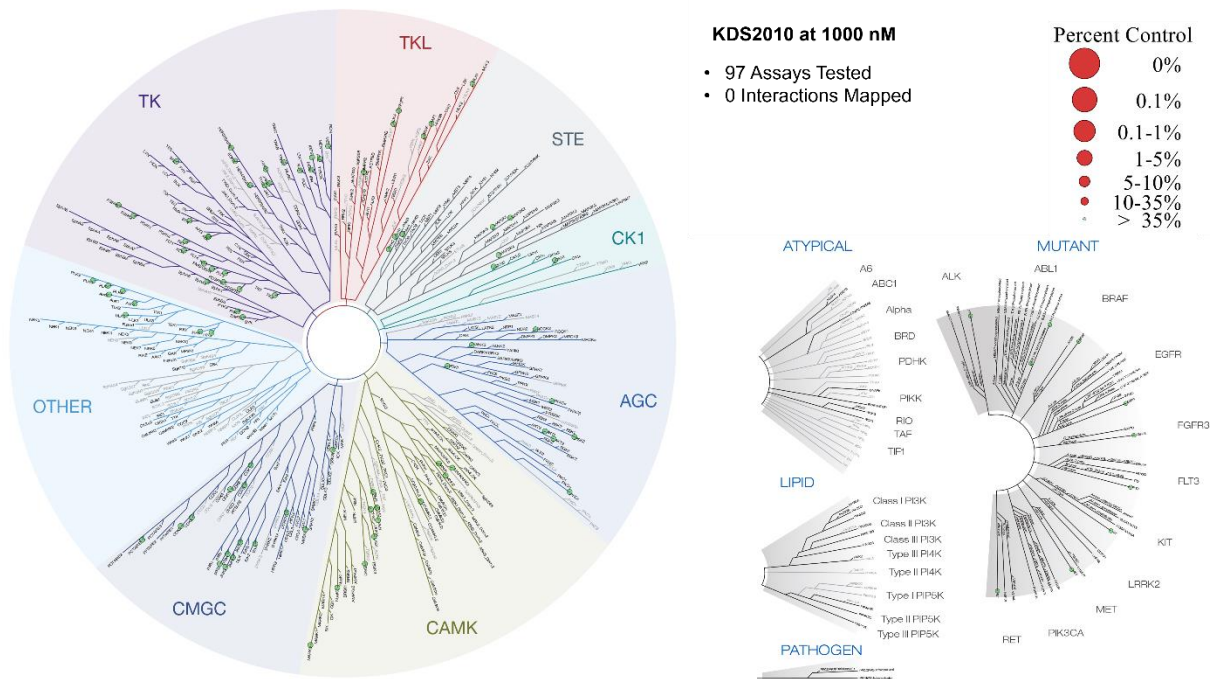

**Fig. S3. The KINOMEscan screening results with 1000 nM of KDS2010 for off-target selectivity.** Schematic diagram of the KINOMEscan™ screening results categorizing human kinases and disease-associated mutant variants. Competitive binding assays for 97 human kinases were performed at 1000 nM KDS2010 and the amount of inhibition through the control ligand reaction was expressed as the size of the red circle and the green circle. Zero interaction mapped means there is no meaningful responses ( $\geq 50\%$  inhibition). TK, Tyrosine Kinase; TKL, Tyrosine Kinase Like; STE, Yeast STE-MAPK family; CK1, Casein Kinase 1; AGC, PKA, PKG, PKC family; CAMK, Calmodulin/Calcium regulated kinases; CMGC, CDK, MAPK, GSK3 and CLK; see table S4 for the detailed results.

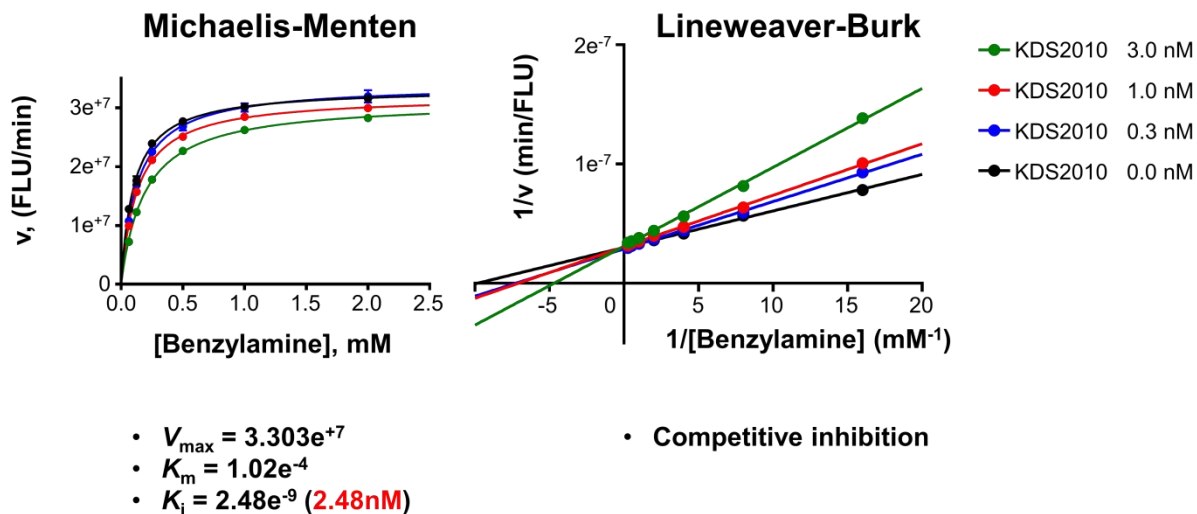

**Fig. S4. Mode of KDS2010 binding with MAO-B.** The catalytic rates were measured at different concentrations of benzylamine (0.065, 0.125, 0.25, 0.5, 1 and 2 mM) in the absence and in the presence of different concentrations (0.3, 1 and 3 nM) of KDS2010. The maximal velocity ( $V_{\max}$ ), Michaelis constant ( $K_m$ ) and inhibition constant ( $K_i$ ) were calculated using Sigma plot®.

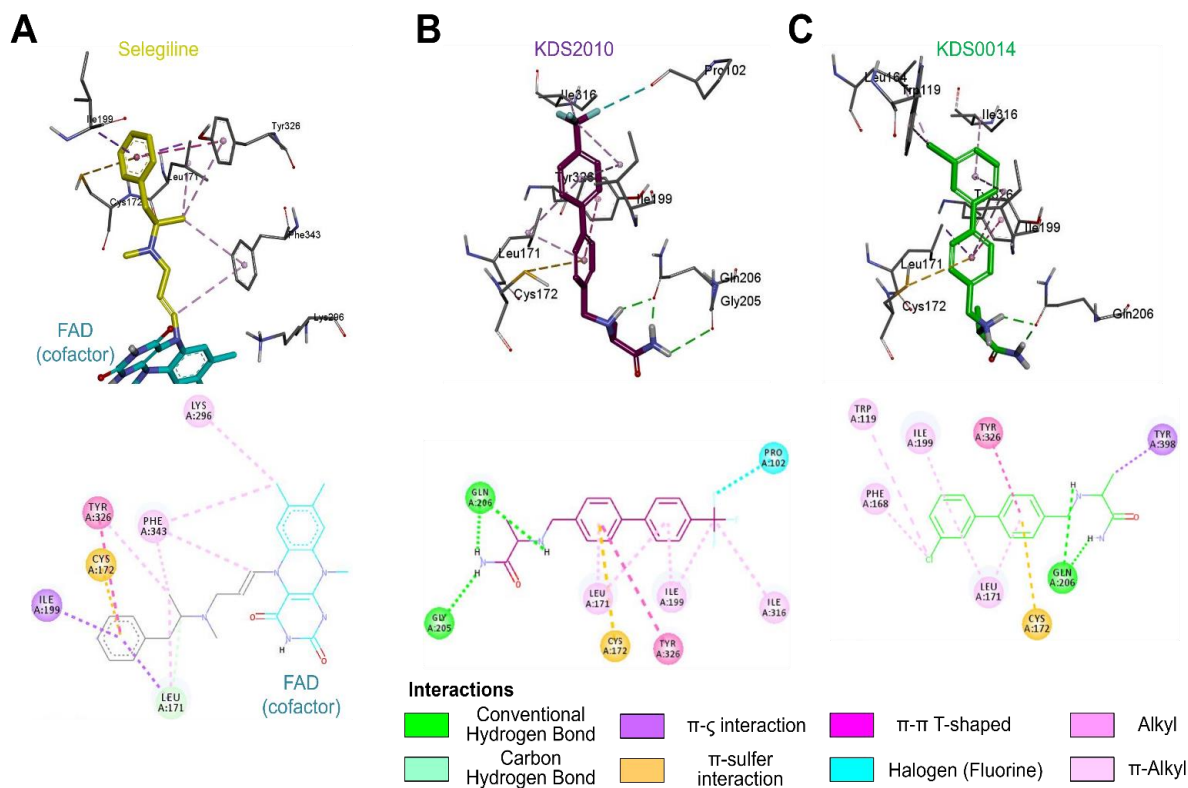

**Fig. S5. Three-day and 2-day interactions of selegiline, KDS2010, and KDS0014 inside MAO-B.** Selegiline, FAD, KDS2010, and KDS0014 shown in yellow, cyan, purple, and green color respectively. Amino acid residues surrounding 4Å of ligand shown in stick format. Color indication for a particular type of interactions explained below the 2D image of protein-ligand interactions.



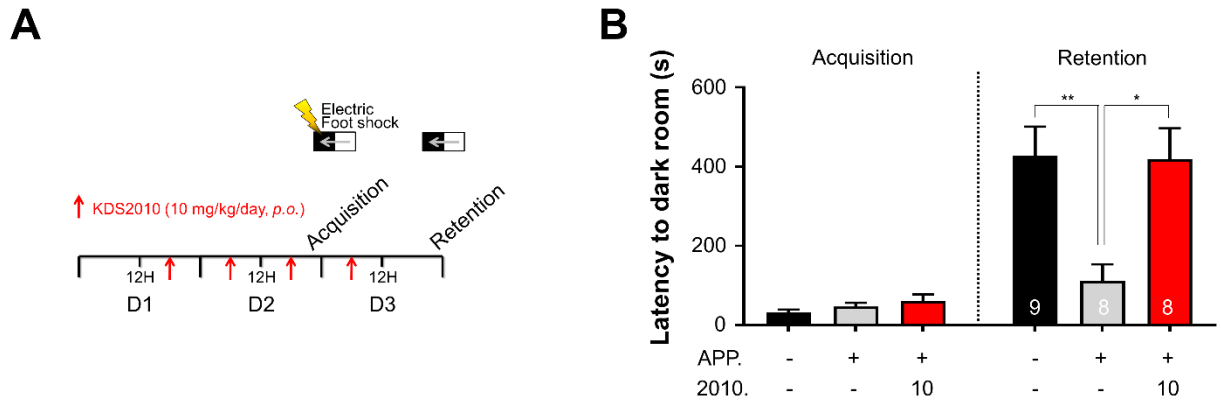

**Fig. S6. Acute treatment of KDS2010 (3 days) restored memory impairment in APP/PS1 mice.** (A) Schematic diagram of the passive avoidance test for wild-type (WT) and APP/PS1 mice with or without oral administration of KDS2010 (10 mg/kg for 3 days;  $n=9$  for WT + water;  $n=8$  for APP/PS1 + water;  $n=8$  for APP/PS1 + KDS2010; both sexes at 10- to 11-month of age). (B) Latency to enter the dark chamber during the passive avoidance test.  $*p < 0.05$ ,  $**p < 0.01$  (One-way ANOVA with *Tukey's* multiple comparisons test). Data are means  $\pm$  s.e.m. Data distribution of bar graphs was presented in the Fig. S10.

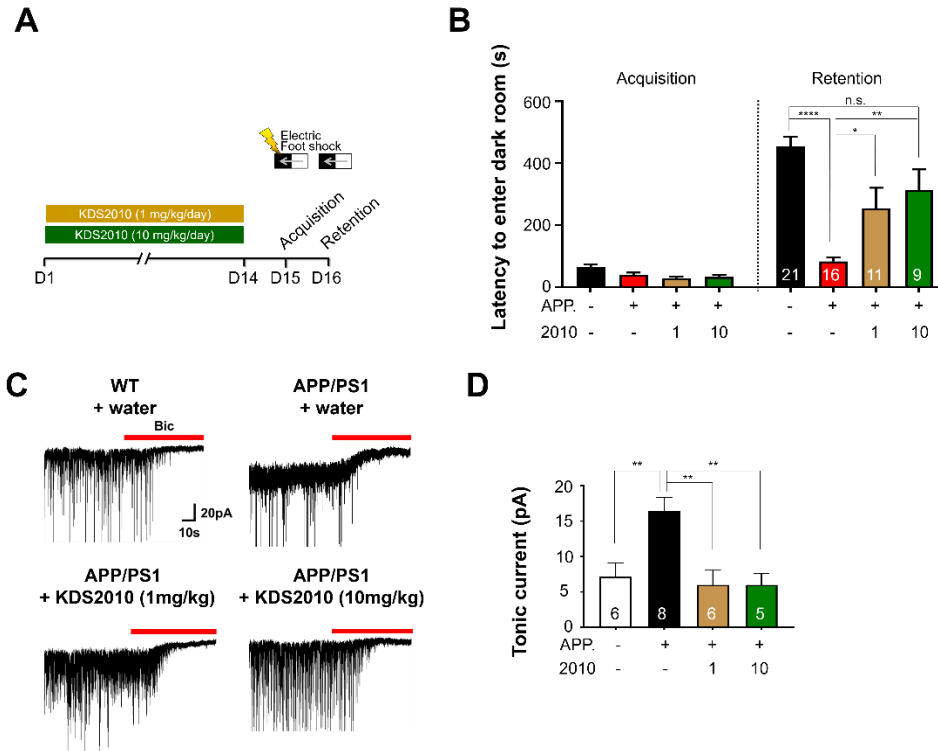

**Fig. S7. Passive avoidance test for learning and memory in APP/PS1 mice with 2-week KDS2010 treatment.** (A) Experimental protocol for the passive avoidance test for wild-type and APP/PS1 mice with oral administration of KDS2010 (1mg/kg or 10 mg/kg for 2-week). (B) Latency to enter the dark chamber during the passive avoidance test ( $n=21$  for WT + water;  $n=16$  for APP/PS1 + water;  $n=11$  for APP/PS1 + KDS2010 1 mg/kg,  $n=9$  for APP/PS1 + KDS2010 10 mg/kg; both sexes at 10- to 12-month of age).  $*p < 0.05$ ,  $**p < 0.01$ ,  $****p < 0.0001$ , and (One-way ANOVA with *Tukey's* test). (C) Representative trace of GABA<sub>A</sub> receptor-mediated current recorded from granule cells of the dentate gyrus ( $n=6$  for WT + water;  $n=8$  for APP/PS1 + water;  $n=6$  for APP/PS1 + KDS2010 1 mg/kg;  $n=5$  for APP/PS1 + KDS2010 10 mg/kg; both sexes at 10- to 11-month of age). Red bars represent the application of GABA<sub>A</sub> receptor antagonist bicuculline (BIC; 20  $\mu$ M). (D) Tonic GABA current by 20  $\mu$ M BIC.  $**p < 0.01$  (One-way ANOVA with *Tukey's* test). n.s., not significant Data are means  $\pm$  s.e.m. Data distribution of bar graphs was presented in the Fig. S10.

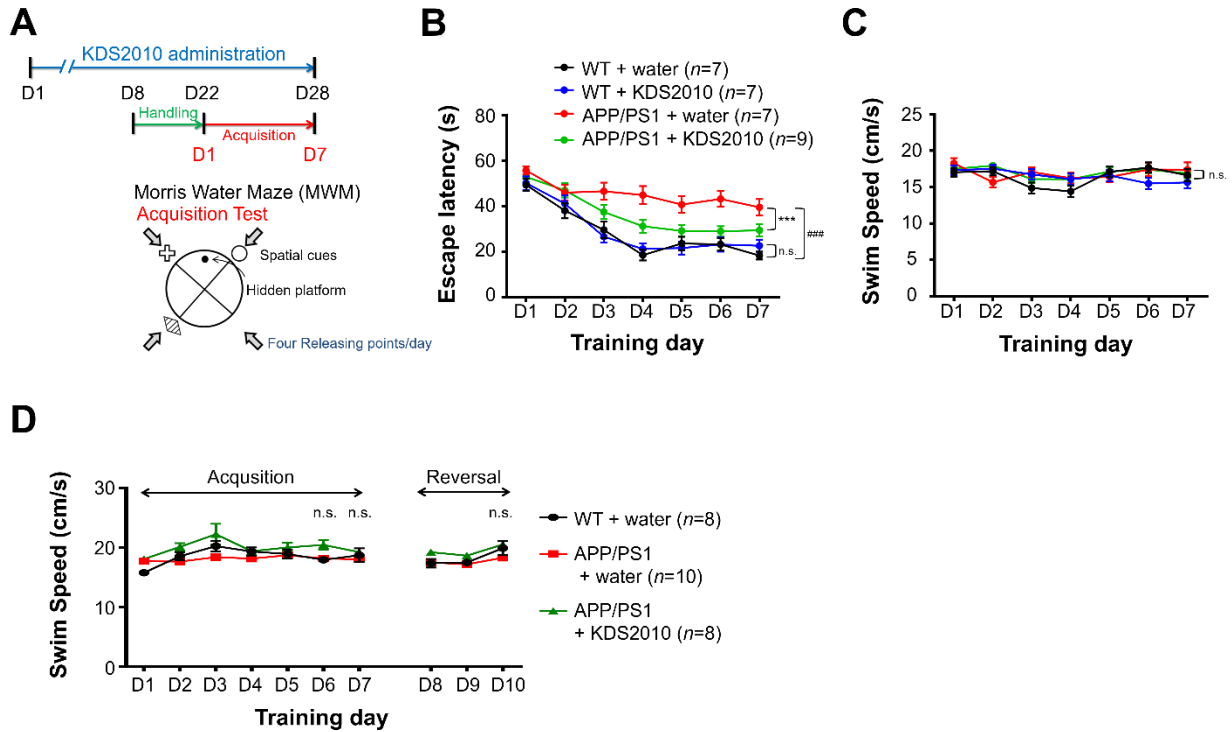

**Fig. S8. KDS2010 significantly recovers spatial learning and memory in Morris water maze.** (A) Experimental protocol for Morris water maze test for WT and APP/PS1 mice with or without oral administration of KDS2010 (10 mg/kg/day for 28 days; both sexes at 10- to 12-month of age). (B) Escape latency during acquisition test.  $***p < 0.001$ , compared with APP/PS1,  $###p < 0.001$ , compared with WT (Two-way repeated measures ANOVA) (C) Swimming speed during acquisition test. n.s., not significant. (Two-way repeated measures ANOVA followed by Fisher's LSD analysis). (D) Swimming speed during acquisition and reversal test (37 day-treatment). Compared with APP/PS1 + water., n.s., not significant, Acquisition (One-way ANOVA with *Tukey's* test), Reversal (One-way ANOVA with *Dunnett's* test). Also see table S6.

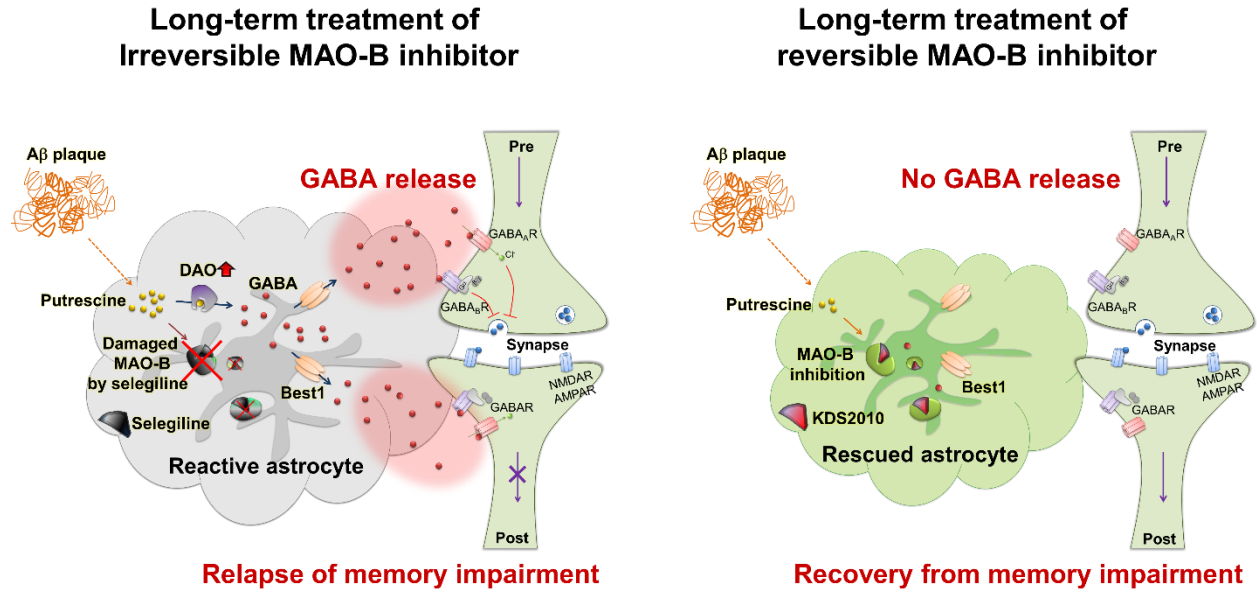

**Fig. S9. Model diagrams of long-term treatment of AD with either irreversible or reversible MAO-B inhibitors.** Aβ: amyloid-beta, MAO-B: monoamine oxidase-B, DAO: diamine oxidase, Best1: bestrophin 1, Pre: presynaptic terminal, Post: postsynapse, NMDAR: *N*-methyl-*D*-aspartate receptor, AMPAR:  $\alpha$ -amino-3-hydroxy-5-methyl-4-isoxazole propionate receptor

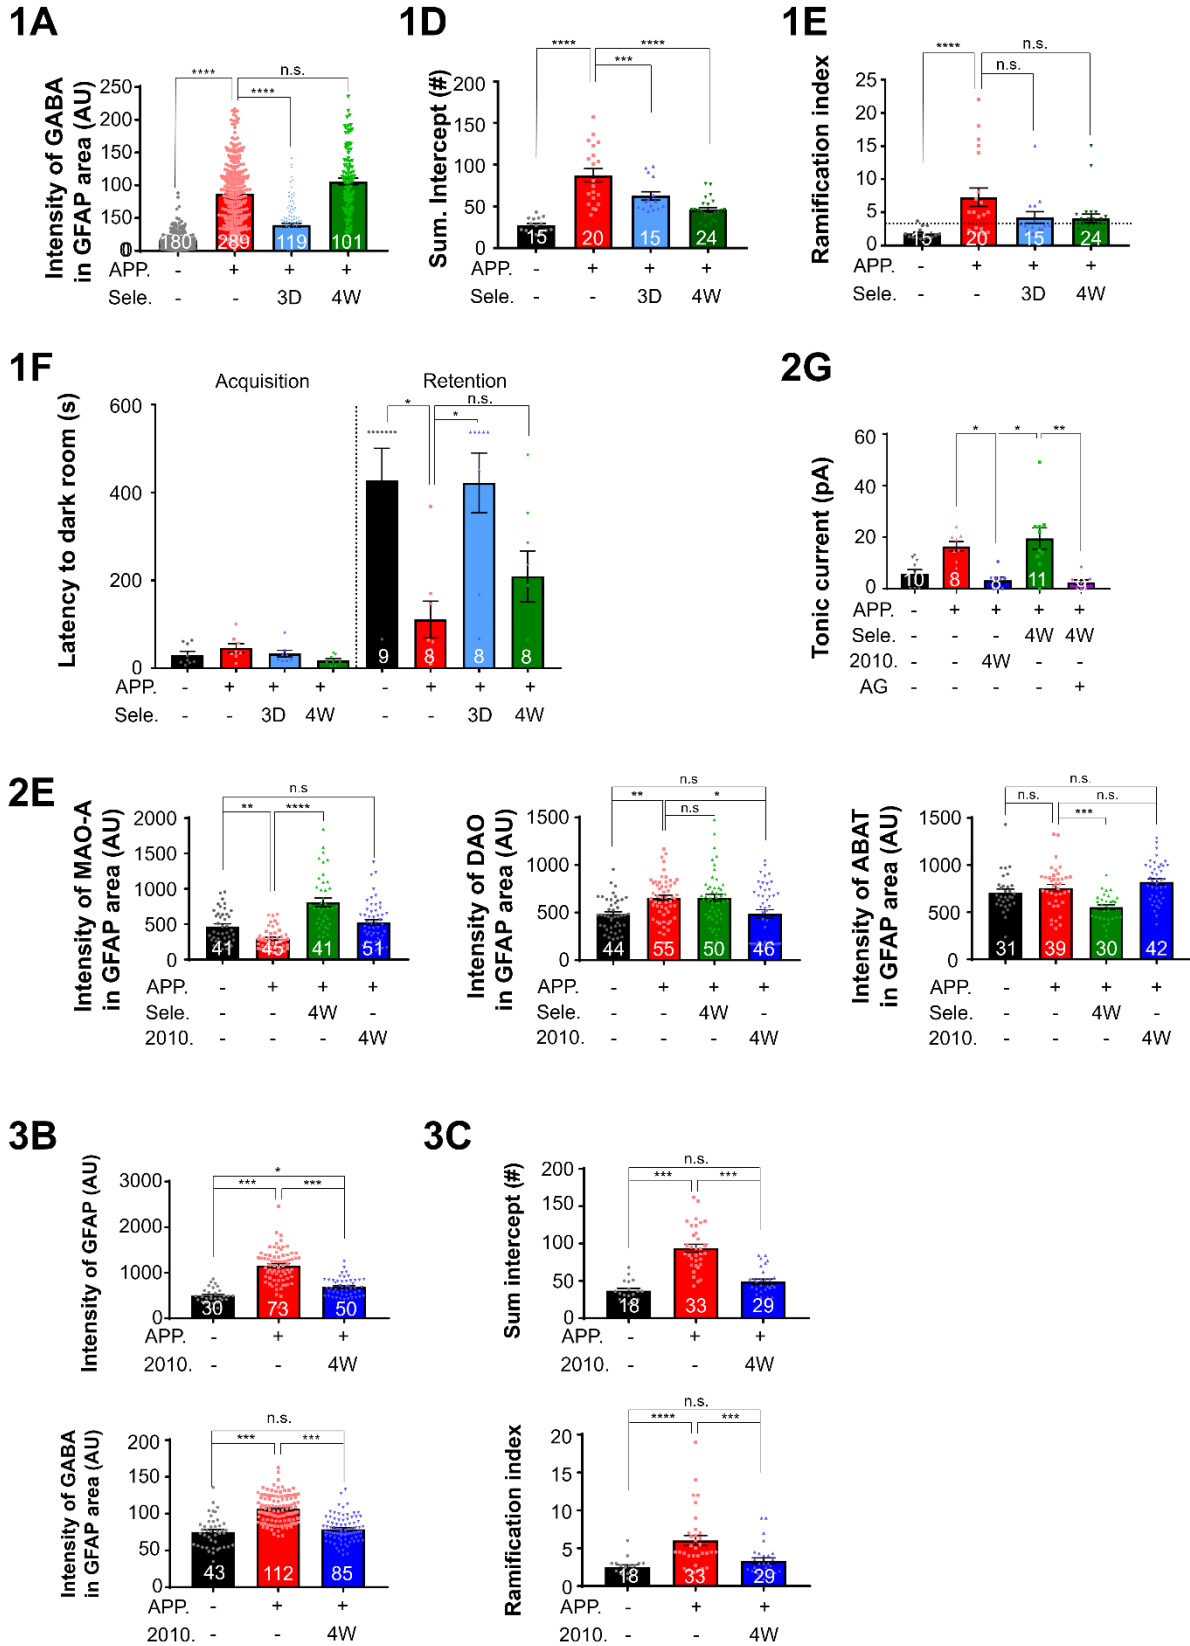

Fig. S10. Data distribution of bar graphs.

**4E**

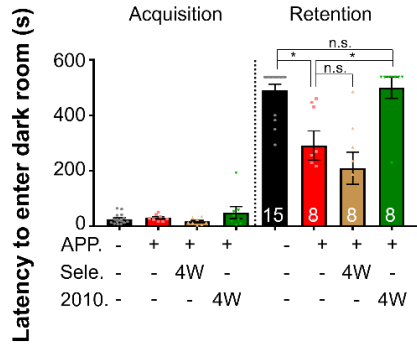

**4G**

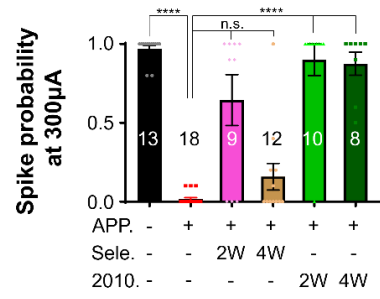

**5F**

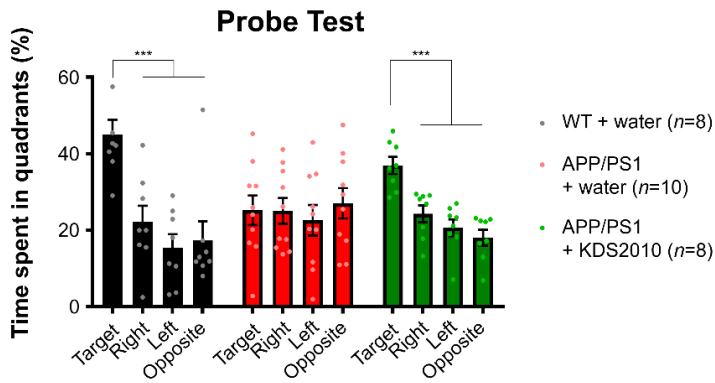

**S4B**

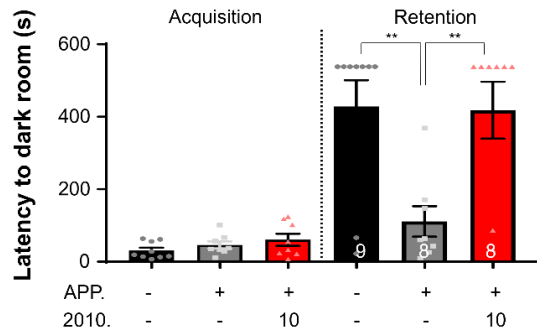

**S5B**

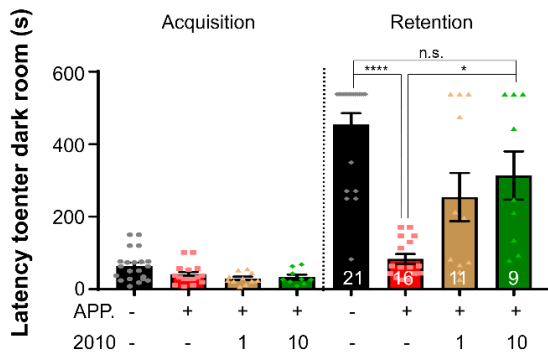

**S5D**

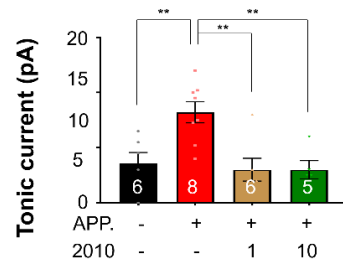

**Fig. S10. Data distribution of bar graphs (continued).**

**Table S1. Inhibitory effects of the synthesized compounds against hMAO enzymes.**

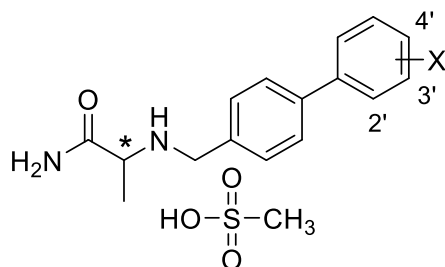

| Compound Code                       | Stereo                | X                   | Inhibition (IC <sub>50</sub> , μM) <sup>a</sup> |                   | SI <sup>b</sup>  |
|-------------------------------------|-----------------------|---------------------|-------------------------------------------------|-------------------|------------------|
|                                     |                       |                     | hMAO-B                                          | hMAO-A            |                  |
| <b>KDS2051<sup>a</sup></b>          | <i>S</i>              | H                   | >10                                             | > 100             | nd <sup>e</sup>  |
| <b>KDS0011</b>                      | <i>S</i>              | 2'-F                | 8.24 ± 0.16                                     | > 100             | >12.1            |
| <b>KDS0015</b>                      | <i>S</i>              | 3'-F                | 3.69 ± 0.08                                     | > 100             | >27.1            |
| <b>KDS2006</b>                      | <i>S</i>              | 4'-F                | 4.29 ± 0.08                                     | > 100             | >23.3            |
| <b>KDS2042</b>                      | <i>S</i>              | 2'-Cl               | > 10                                            | > 100             | nd <sup>e</sup>  |
| <b>KDS0014</b>                      | <i>S</i>              | 3'-Cl               | 0.242 ± 0.008                                   | > 100             | >413             |
| <b>KDS2005</b>                      | <i>S</i>              | 4'-Cl               | 0.182 ± 0.007                                   | > 100             | >549             |
| <b>KDS2041</b>                      | <i>S</i>              | 2'-CF <sub>3</sub>  | > 10                                            | > 100             | nd <sup>e</sup>  |
| <b>KDS0012</b>                      | <i>S</i>              | 3'-CF <sub>3</sub>  | 0.316 ± 0.006                                   | > 100             | >316             |
| <b>KDS2010</b>                      | <i>S</i> <sup>c</sup> | 4'-CF <sub>3</sub>  | 0.008 ± 0.001                                   | > 100             | >10,000          |
| <b>KDS2002</b>                      | <i>S</i>              | 3'-OCF <sub>3</sub> | 0.216 ± 0.005                                   | > 100             | >463             |
| <b>KDS2001</b>                      | <i>S</i>              | 4'-OCF <sub>3</sub> | 0.098 ± 0.003                                   | > 100             | >1,020           |
| <b>KDS2029</b>                      |                       |                     |                                                 |                   |                  |
| <b>(<i>R</i>-isomer of KDS2010)</b> | <i>R</i> <sup>c</sup> | 4'-CF <sub>3</sub>  | 0.058 ± 0.003                                   | > 100             | >1,724           |
| Selegiline <sup>d</sup>             |                       |                     | 0.010 ± 0.001                                   | 1.5 ± 0.02        | 150              |
| Sembragiline <sup>d</sup>           |                       |                     | 0.015 ± 0.005<br>0.006 ± 0.001 <sup>f</sup>     | 3.85 <sup>f</sup> | 653 <sup>f</sup> |

<sup>a</sup>Inhibition data are reported as IC<sub>50</sub> (μM) ; the SEM was always less than ±5%.

<sup>b</sup>SI; selectivity index, the selectivity for the MAO-B isoform and is given as the ratio of IC<sub>50</sub>(MAO-A)/IC<sub>50</sub>(MAO-B).

<sup>c</sup>Enantiomeric purity of KDS2010 & KDS2029; both ~9:1 enantiomeric mixture

<sup>d</sup>Positive controls; selegiline: irreversible inhibitor, sembragiline: reversible inhibitor.

<sup>e</sup>nd: not determined.

<sup>f</sup>: Borroni, E. et al. Sembragiline: a novel, selective monoamine oxidase type B inhibitor for the treatment of Alzheimer's disease. *J. Pharmacol. Exp. Ther.* 362, 413-423 (2017)

**Table S2. In vitro and in vivo ADME/Tox profile of KDS2010.**

| Stability (% remaining) <sup>a</sup> |            |                 | CYP inhibition |                       | In vivo Toxicity (Rat) |                            | hERG inhibition, IC <sub>50</sub> (μM) <sup>d</sup> |
|--------------------------------------|------------|-----------------|----------------|-----------------------|------------------------|----------------------------|-----------------------------------------------------|
| Species                              | Microsomes | Plasma          | Subtype        | % Inhibition at 10 μM | Dosing (p.o.)          | NOAEL <sup>b</sup> (mg/kg) |                                                     |
| Human                                | 92.2±7.2   | 98.3±5.2        | 1A2            | 62.5±2.8              | Single                 | >1000                      | >50                                                 |
| Dog                                  | 60.7±5.2   | nd <sup>c</sup> | 2C9            | 99.1±4.3              | Repeated (2weeks)      | >200                       |                                                     |
| Rat                                  | 59.5±6.5   | 95.2±6.7        | 2C19           | 84.0±3.8              |                        |                            |                                                     |
| Mouse                                | 66.0±3.1   | nd <sup>c</sup> | 2D6            | 89.3±6.1              |                        |                            |                                                     |
|                                      |            |                 | 3A4            | 98.8±5.7              |                        |                            |                                                     |

<sup>a</sup>% Parent compound remaining was determined after 30 min (microsomes) or 120 min (plasma) incubation.

<sup>b</sup>NOAEL; No observed adverse effect level, the highest tested dose at which no such adverse effect is found in exposed test organisms. %.

<sup>c</sup>nd; Not determined. %.

<sup>d</sup>hERG channel binding assay was performed using predictor hERG fluorescence polarization assay. IC<sub>50</sub> value was calculated with nonlinear regression fit with four parameters.



**Table S3. In vivo pharmacokinetic parameters of KDS2010.**

| PK <sup>a</sup> |                                        |                          |                                  |                                |                                    |                                        |                 |
|-----------------|----------------------------------------|--------------------------|----------------------------------|--------------------------------|------------------------------------|----------------------------------------|-----------------|
| Compd.          | <i>i.v.</i>                            |                          |                                  |                                | <i>p.o.</i>                        |                                        | <i>F</i><br>(%) |
|                 | <i>AUC</i> <sub>all</sub><br>(ng*h/mL) | <i>CL</i><br>(mL/min/kg) | <i>V</i> <sub>ss</sub><br>(L/kg) | <i>t</i> <sub>1/2</sub><br>(h) | <i>C</i> <sub>max</sub><br>(ng/mL) | <i>AUC</i> <sub>all</sub><br>(ng*h/mL) |                 |
| <b>KDS2010</b>  | 421.1±42.6                             | 39.9±4.0                 | 10.1±0.8                         | 3.3±0.2                        | 952.1±80.3                         | 5201.5±458                             | 123.5           |

  

| Compd.         | Plasma concentration | Brain concentration <sup>b</sup> | Brain-to-plasma ratio <sup>c</sup> |
|----------------|----------------------|----------------------------------|------------------------------------|
|                | (ng/mL)              | (ng/g)                           | (B/P)                              |
| <b>KDS2010</b> | 730.2±51.3           | 6,716.3±260.6                    | 9.2                                |

<sup>a</sup>Rats (*n* = 5) were dosed with 1 mg/kg for *i.v.* and 10 mg/kg for *p.o.*. Parameters were calculated from composite mean plasma concentration-time data. Data are expressed as the mean ± SD. %.

<sup>b</sup>Brain concentration was determined by the amount of KDS2010 in total brain homogenate from rats (*n* = 5, 2 h after oral administration with 10 mg/kg).

<sup>c</sup>B/P: brain concentration/plasma concentration (2 h after oral administration with 10 mg/kg) calculated using 1 g/mL brain density.

**Abbreviations:** *Compd.*, compound; *AUC*, area under the plasma concentration–time curve; *CL*, time-averaged total body clearance; *V*<sub>ss</sub>, apparent volume of distribution at steady state; *t*<sub>1/2</sub>, elimination half-life; *C*<sub>max</sub>, maximum concentration of the drug; *F*, bioavailability

**Table S4. KDS2010 interactions with 87 primary molecular targets including GPCRs, kinases, non-kinase enzymes, nuclear receptors, transporters, and various ion channels.**

| Target                                               | Abbreviation        | Species | Substrate                                                                         | % Binding response at 1µM |
|------------------------------------------------------|---------------------|---------|-----------------------------------------------------------------------------------|---------------------------|
| <b>GPCR</b>                                          |                     |         |                                                                                   |                           |
| Adenosine A <sub>1</sub>                             | A <sub>1</sub>      | Human   | 1.0 nM [ <sup>3</sup> H] DPCPX                                                    | 3                         |
| Adenosine A <sub>2A</sub>                            | A <sub>2A</sub>     | Human   | 0.050 µM [ <sup>3</sup> H] CGS-21680                                              | -2                        |
| Adrenergic α <sub>1A</sub>                           | α <sub>1A</sub>     | Rat     | 0.25 nM [ <sup>3</sup> H] Prazosin                                                | 5                         |
| Adrenergic α <sub>1B</sub>                           | α <sub>1B</sub>     | Rat     | 0.25 nM [ <sup>3</sup> H] Prazosin                                                | 2                         |
| Adrenergic α <sub>1D</sub>                           | α <sub>1D</sub>     | Human   | 0.60 nM [ <sup>3</sup> H] Prazosin                                                | -3                        |
| Adrenergic α <sub>2A</sub>                           | α <sub>2A</sub>     | Human   | 1.50 nM [ <sup>3</sup> H] Rauwolscine                                             | 8                         |
| Adrenergic α <sub>2B</sub>                           | α <sub>2B</sub>     | Human   | 2.50 nM [ <sup>3</sup> H] Rauwolscine                                             | -3                        |
| Adrenergic β <sub>1</sub>                            | β <sub>1</sub>      | Human   | 0.030 nM [ <sup>125</sup> I] Cyanopindolol                                        | -3                        |
| Adrenergic β <sub>2</sub>                            | β <sub>2</sub>      | Human   | 0.20 nM [ <sup>3</sup> H] CGP-12177                                               | 0                         |
| Angiotensin AT <sub>1</sub>                          | AT <sub>1</sub>     | Human   | 20.0 pM [ <sup>125</sup> I] (Sar <sup>1</sup> , Ile <sup>8</sup> )-Angiotensin II | -2                        |
| Bradykinin B <sub>2</sub>                            | B <sub>2</sub>      | Human   | 0.50 nM [ <sup>3</sup> H] Bradykinin                                              | -2                        |
| Cannabinoid CB <sub>1</sub>                          | CB <sub>1</sub>     | Human   | 2.0 nM [ <sup>3</sup> H] SR141716A                                                | -5                        |
| Cannabinoid CB <sub>2</sub>                          | CB <sub>2</sub>     | Human   | 2.40 nM [ <sup>3</sup> H] WIN-55,212-2                                            | 11                        |
| Chemokine CCR1                                       | CCR1                | Human   | 0.10 nM [ <sup>125</sup> I] MIP-1α                                                | -4                        |
| Chemokine CXCR2 (IL-8RB)                             | CXCR2               | Human   | 15.0 pM [ <sup>125</sup> I] IL-8                                                  | 10                        |
| Cholecystokinin CCK <sub>1</sub> (CCK <sub>A</sub> ) | CCK <sub>1</sub>    | Human   | 0.11 nM [ <sup>125</sup> I] CCK-8                                                 | -13                       |
| Cholecystokinin CCK <sub>2</sub> (CCK <sub>B</sub> ) | CCK <sub>2</sub>    | Human   | 0.050 nM [ <sup>125</sup> I] CCK-8                                                | 10                        |
| Dopamine D <sub>1</sub>                              | D <sub>1</sub>      | Human   | 1.40 nM [ <sup>3</sup> H] SCH-23390                                               | 2                         |
| Dopamine D <sub>2L</sub>                             | D <sub>2L</sub>     | Human   | 0.16 nM [ <sup>3</sup> H] Spiperone                                               | 5                         |
| Dopamine D <sub>2S</sub>                             | D <sub>2S</sub>     | Human   | 0.16 nM [ <sup>3</sup> H] Spiperone                                               | 0                         |
| Endothelin ET <sub>A</sub>                           | ET <sub>A</sub>     | Human   | 0.030 nM [ <sup>125</sup> I] Endothelin-1                                         | 11                        |
| GABA <sub>B1A</sub>                                  | GABA <sub>B1A</sub> | Human   | 4.0 nM [ <sup>3</sup> H] CGP-54626                                                | -4                        |
| Glutamate, Metabotropic, mGlu <sub>5</sub>           | mGlu <sub>5</sub>   | Human   | 0.030 µM [ <sup>3</sup> H] Quisqualic acid                                        | 14                        |
| Histamine H <sub>1</sub>                             | H <sub>1</sub>      | Human   | 1.20 nM [ <sup>3</sup> H] Pyrilamine                                              | 11                        |
| Histamine H <sub>2</sub>                             | H <sub>2</sub>      | Human   | 0.10 nM [ <sup>125</sup> I] Aminopentidine                                        | 1                         |
| Leukotriene, Cysteinyl CysLT <sub>1</sub>            | CysLT <sub>1</sub>  | Human   | 0.30 nM [ <sup>3</sup> H] LTD4                                                    | 2                         |
| Melanocortin MC <sub>1</sub>                         | MC <sub>1</sub>     | Human   | 0.040 nM [ <sup>125</sup> I] NDP-α-MSH                                            | -3                        |
| Melanocortin MC <sub>4</sub>                         | MC <sub>4</sub>     | Human   | 20.0 pM [ <sup>125</sup> I] NDP-α-MSH                                             | 8                         |
| Muscarinic M <sub>1</sub>                            | M <sub>1</sub>      | Human   | 0.80 nM [ <sup>3</sup> H] N-Methylscopolamine                                     | -3                        |
| Muscarinic M <sub>2</sub>                            | M <sub>2</sub>      | Human   | 0.80 nM [ <sup>3</sup> H] N-Methylscopolamine                                     | -2                        |
| Muscarinic M <sub>3</sub>                            | M <sub>3</sub>      | Human   | 0.80 nM [ <sup>3</sup> H] N-Methylscopolamine                                     | 1                         |
| Muscarinic M <sub>4</sub>                            | M <sub>4</sub>      | Human   | 0.80 nM [ <sup>3</sup> H] N-Methylscopolamine                                     | 3                         |
| Tachykinin NK <sub>1</sub>                           | NK <sub>1</sub>     | Human   | 0.80 nM [ <sup>3</sup> H] Substance P                                             | -11                       |
| Opiate δ <sub>1</sub> (OP <sub>1</sub> , DOP)        | DOP                 | Human   | 1.30 nM [ <sup>3</sup> H] Naltrindole                                             | 7                         |
| Neuropeptide Y Y <sub>1</sub>                        | NPY <sub>1</sub>    | Human   | 15.0 pM [ <sup>125</sup> I] Peptide YY                                            | -4                        |
| Opiate κ (OP <sub>2</sub> , KOP)                     | KOP                 | Human   | 0.60 nM [ <sup>3</sup> H] Diprenorphine                                           | -1                        |
| Opiate μ (OP <sub>3</sub> , MOP)                     | MOP                 | Human   | 0.60 nM [ <sup>3</sup> H] Diprenorphine                                           | 14                        |
| Platelet Activating Factor (PAF)                     | PAF                 | Human   | 0.12 nM [ <sup>3</sup> H] PAF                                                     | -10                       |
| Serotonin (5-Hydroxytryptamine) 5-HT <sub>1A</sub>   | 5-HT <sub>1A</sub>  | Human   | 1.50 nM [ <sup>3</sup> H] 8-OH-DPAT                                               | 2                         |
| Serotonin (5-Hydroxytryptamine) 5-HT <sub>1B</sub>   | 5-HT <sub>1B</sub>  | Human   | 1.0 nM [ <sup>3</sup> H] GR125743                                                 | -3                        |
| Serotonin (5-Hydroxytryptamine) 5-HT <sub>2A</sub>   | 5-HT <sub>2A</sub>  | Human   | 0.50 nM [ <sup>3</sup> H] Ketanserin                                              | -3                        |
| Serotonin (5-Hydroxytryptamine) 5-HT <sub>2B</sub>   | 5-HT <sub>2B</sub>  | Human   | 1.20 nM [ <sup>3</sup> H] Lysergic acid diethylamide (LSD)                        | 19                        |
| Serotonin (5-Hydroxytryptamine) 5-HT <sub>2C</sub>   | 5-HT <sub>2C</sub>  | Human   | 1.0 nM [ <sup>3</sup> H] Mesulergine                                              | -5                        |

|                                                    |                       |            |                                                                             |     |
|----------------------------------------------------|-----------------------|------------|-----------------------------------------------------------------------------|-----|
| Vasopressin V <sub>1A</sub>                        | V <sub>1A</sub>       | Human      | 0.030 nM<br>[ <sup>125</sup> I]PhenylacetylTyr(Me)PheGlnAsnArg<br>ProArgTyr | -6  |
| <b>Kinase</b>                                      |                       |            |                                                                             |     |
| Protein Tyrosine Kinase, Insulin Receptor          | IR                    | Human      | 200 µg/mL Poly(Glu:Tyr)                                                     | -15 |
| Protein Tyrosine Kinase, LCK                       | LCK                   | Human      | 200 µg/mL Poly(Glu:Tyr)                                                     | 0   |
| Protein Serine/Threonine Kinase, PKC, Nonselective | PKC                   | Rat        | 370 µg/mL Histone                                                           | 12  |
| <b>Non-Kinase Enzyme</b>                           |                       |            |                                                                             |     |
| ATPase, Na <sup>+</sup> /K <sup>+</sup> , Heart    | ATPase                | Pig        | 100 µM ATP                                                                  | -9  |
| Phosphodiesterase PDE4                             | PDE4                  | Human      | 1.01 µM [ <sup>3</sup> H]cAMP + cAMP                                        | -5  |
| Peptidase, CTSG (Cathepsin G)                      | CTSG                  | Human      | 20.0 µM Suc-Ala-Ala-Pro-Phe-AMC                                             | 0   |
| Peptidase, Angiotensin Converting Enzyme           | ACE                   | Rabbit     | 500 µM (N-3-[2-furyl] acryloyl)-Phe-Gly-Gly (FAPGG)                         | 0   |
| Cholinesterase, Acetyl                             | ACES                  | Human      | 700 µM Acetylthiocholine                                                    | 27  |
| Cyclooxygenase COX-1                               | COX-1                 | Human      | 100 µM Arachidonic acid                                                     | 15  |
| Cyclooxygenase COX-2                               | COX-2                 | Human      | 0.30 µM Arachidonic acid                                                    | -11 |
| Monoamine Oxidase MAO-A                            | Mao-a                 | Human      | 50.0 µM Kynuramine                                                          | 5   |
| Monoamine Oxidase MAO-B                            | Mao-b                 | Human      | 50.0 µM Kynuramine                                                          | 99  |
| Phosphodiesterase PDE3                             | PDE3                  | Human      | 1.01 µM [ <sup>3</sup> H]cAMP + cAMP                                        | -7  |
| PPAR <sub>γ</sub>                                  | PPAR <sub>γ</sub>     | Human      | 5.0 nM [ <sup>3</sup> H] Rosiglitazone                                      | -3  |
| <b>Nuclear Receptor</b>                            |                       |            |                                                                             |     |
| Androgen (Testosterone)                            | AR                    | Human      | 0.50 nM [ <sup>3</sup> H] Methyltrienolone                                  | -3  |
| Estrogen ER <sub>α</sub>                           | ER <sub>α</sub>       | Human      | 0.50 nM [ <sup>3</sup> H] Estradiol                                         | 1   |
| Glucocorticoid                                     | GR                    | Human      | 5.0 nM [ <sup>3</sup> H] Dexamethasone                                      | 7   |
| Progesterone PR-B                                  | PR-B                  | Human      | 0.50 nM [ <sup>3</sup> H] Progesterone                                      | -4  |
| <b>Transporter</b>                                 |                       |            |                                                                             |     |
| Transporter, Adenosine                             | AT                    | Guinea Pig | 0.50 nM [ <sup>3</sup> H] Nitrobenzylthioinosine                            | 5   |
| Transporter, Dopamine (DAT)                        | DAT                   | Human      | 0.15 nM [ <sup>125</sup> I] RTI-55                                          | 8   |
| Transporter, GABA                                  | GAT                   | Rat        | 6.0 nM [ <sup>3</sup> H] GABA                                               | 4   |
| Transporter, Norepinephrine (NET)                  | NET                   | Human      | 0.20 nM [ <sup>125</sup> I] RTI-55                                          | 12  |
| Transporter, Serotonin (SERT)                      | SERT                  | Human      | 0.40 nM [ <sup>3</sup> H] Paroxetine                                        | -3  |
| <b>Channel</b>                                     |                       |            |                                                                             |     |
| GABA <sub>A</sub> , Chloride Channel, TBOB         | GABA <sub>A</sub> , C | Rat        | 3.0 nM [ <sup>3</sup> H] TBOB                                               | 0   |
| GABA <sub>A</sub> , Flunitrazepam, Central         | GABA <sub>A</sub> , F | Rat        | 1.0 nM [ <sup>3</sup> H] Flunitrazepam                                      | 9   |
| Glutamate, NMDA, Agonism                           | NMDA, A               | Rat        | 2.0 nM [ <sup>3</sup> H] CGP-39653                                          | 2   |
| GABA <sub>A</sub> , Ro-15-1788, Hippocamp`us       | GABA <sub>A</sub> , R | Rat        | 1.0 nM [ <sup>3</sup> H] Ro-15-1788                                         | 17  |
| Glutamate, AMPA                                    | AMPA                  | Rat        | 5.0 nM [ <sup>3</sup> H] AMPA                                               | 2   |
| Glutamate, Kainate                                 | Kainate               | Rat        | 5.0 nM [ <sup>3</sup> H] Kainic acid                                        | -1  |
| Glutamate, NMDA, Glycine                           | NMDA, G               | Rat        | 0.33 nM [ <sup>3</sup> H] MDL 105,519                                       | 1   |
| Glutamate, NMDA, Phencyclidine                     | NMDA, Ph              | Rat        | 4.0 nM [ <sup>3</sup> H] TCP                                                | 3   |
| Glutamate, NMDA, Polyamine                         | NMDA, Poly            | Rat        | 2.0 nM [ <sup>3</sup> H] Ifenprodil                                         | 2   |
| Glycine, Strychnine-Sensitive                      | Glycine               | Rat        | 10 nM [ <sup>3</sup> H] Strychnine                                          | 2   |
| Nicotinic Acetylcholine                            | nAChR                 | Human      | 0.10 nM [ <sup>125</sup> I] Epibatidine                                     | -10 |
| Nicotinic Acetylcholine α1, Bungarotoxin           | nAChR α1              | Human      | 0.60 nM [ <sup>125</sup> I] α-Bungarotoxin                                  | -5  |
| Serotonin (5-Hydroxytryptamine) 5-HT <sub>3</sub>  | 5-HT <sub>3</sub>     | Human      | 0.69 nM [ <sup>3</sup> H] GR-65630                                          | 11  |
| Calcium Channel L-Type, Dihydropyridine            | CAV (L-TYPE), D       | Rat        | 0.10 nM [ <sup>3</sup> H] Nitrendipine                                      | -1  |
| Calcium Channel L-Type, Benzothiazepine            | CAV (L-TYPE), B       | Rat        | 2.0 nM [ <sup>3</sup> H] Diltiazem                                          | -8  |
| Calcium Channel L-Type,                            | CAV                   | Rat        | 0.40 nM [ <sup>3</sup> H] (-)-Desmethoxyverapamil                           | 16  |

|                                       |                  |       |                                            |    |
|---------------------------------------|------------------|-------|--------------------------------------------|----|
| Phenylalkylamine                      | (L-TYPE), P      |       | (D-888)                                    |    |
| Calcium Channel N-Type                | CAV<br>(N-TYPE)  | Rat   | 10 pM [ <sup>125</sup> I] ω-Conotoxin GVIA | 0  |
| Potassium Channel [K <sub>ATP</sub> ] | K <sub>ATP</sub> | Human | 5.0 nM [ <sup>3</sup> H] Glyburide         | -7 |
| Potassium Channel hERG                | hERG             | Human | 1.50 nM [ <sup>3</sup> H] Astemizole       | 3  |
| Sodium Channel, Site 2                | Na channel       | Rat   | 5.0 nM [ <sup>3</sup> H] Batrachotoxinin   | 38 |

---

**Table S5. KDS2010 interactions with 97 kinase including TK, TKL, STE, CK1, AGC, CAMK, CMGC, ATYPICAL, LIPID, and Mutant form.**

| Target                                                                 | Abbreviation                    | %Ctrl comp. inhibition at 1 $\mu$ M |
|------------------------------------------------------------------------|---------------------------------|-------------------------------------|
| <b>TK</b>                                                              |                                 |                                     |
| c-abl oncogene 1, receptor tyrosine kinase                             | ABL1-<br>nonphosphorylated      | 10                                  |
| c-abl oncogene 1, receptor tyrosine kinase                             | ABL1-<br>phosphorylated         | 8                                   |
| anaplastic lymphoma receptor tyrosine kinase                           | ALK                             | 41                                  |
| AXL receptor tyrosine kinase                                           | AXL                             | 17                                  |
| bone morphogenetic protein receptor, type II (serine/threonine kinase) | BMPR2                           | 0                                   |
| Bruton agammaglobulinemia tyrosine kinase                              | BTK                             | 5                                   |
| colony stimulating factor 1 receptor                                   | CSF1R                           | 1                                   |
| epidermal growth factor receptor                                       | EGFR                            | 0                                   |
| EPH receptor A2                                                        | EPHA2                           | 15                                  |
| erb-b2 receptor tyrosine kinase 2                                      | ERBB2                           | 8                                   |
| erb-b2 receptor tyrosine kinase 4                                      | ERBB4                           | 6                                   |
| PTK2 protein tyrosine kinase 2                                         | PTK2                            | 4                                   |
| fibroblast growth factor receptor 2                                    | FGFR2                           | 10                                  |
| fibroblast growth factor receptor 3                                    | FGFR3                           | 6                                   |
| fms-related tyrosine kinase 3                                          | FLT3                            | 14                                  |
| insulin-like growth factor 1 receptor                                  | IGF1R                           | 0                                   |
| insulin receptor                                                       | INSR                            | 28                                  |
| Janus kinase 2                                                         | JAK2(JH1 domain-<br>catalytic)  | 28                                  |
| Janus kinase 3                                                         | JAK3 (JH1 domain-<br>catalytic) | 10                                  |
| v-kit Hardy-Zuckerman 4 feline sarcoma viral oncogene homolog          | KIT                             | 0                                   |
| met proto-oncogene (hepatocyte growth factor receptor)                 | MET                             | 4                                   |
| platelet-derived growth factor receptor, alpha polypeptide             | PDGFRA                          | 6                                   |
| platelet-derived growth factor receptor, beta polypeptide              | PDGFRB                          | 0                                   |
| ret proto-oncogene                                                     | RET                             | 13                                  |
| SRC proto-oncogene, non-receptor tyrosine kinase                       | SRC                             | 10                                  |
| TEK tyrosine kinase, endothelial                                       | TEK                             | 5                                   |
| neurotrophic tyrosine kinase, receptor, type 1                         | NTRK1                           | 0                                   |
| tyrosine kinase 2                                                      | TYK2                            | 44                                  |
| kinase insert domain receptor (a type III receptor tyrosine kinase)    | KDR                             | 0                                   |
| zeta-chain (TCR) associated protein kinase 70kDa                       | ZAP70                           | 0                                   |
| <b>TKL</b>                                                             |                                 |                                     |
| activin A receptor, type IB                                            | ACVR1B                          | 5                                   |
| v-raf murine sarcoma viral oncogene homolog B1                         | BRAF                            | 6                                   |
| mitogen-activated protein kinase kinase kinase 9                       | MAP3K9                          | 9                                   |
| v-raf-1 murine leukemia viral oncogene homolog 1                       | RAF1                            | 3                                   |
| transforming growth factor, beta receptor 1                            | TGFBR1                          | 17                                  |
| <b>STE</b>                                                             |                                 |                                     |
| mitogen-activated protein kinase kinase kinase 4                       | MAP3K4                          | 1                                   |
| mitogen-activated protein kinase kinase 1                              | MAP2K1                          | 9                                   |
| mitogen-activated protein kinase kinase 2                              | MAP2K2                          | 0                                   |
| p21 protein (Cdc42/Rac)-activated kinase 1                             | PAK1                            | 6                                   |
| p21 protein (Cdc42/Rac)-activated kinase 2                             | PAK2                            | 22                                  |
| p21 protein (Cdc42/Rac)-activated kinase 3                             | PAK4                            | 0                                   |
| <b>CK1</b>                                                             |                                 |                                     |
| casein kinase 1, delta                                                 | CSNK1D                          | 0                                   |
| casein kinase 1, gamma 2                                               | CSNK1G2                         | 2                                   |

| AGC                                                                        |                                |    |
|----------------------------------------------------------------------------|--------------------------------|----|
| v-akt murine thymoma viral oncogene homolog 1                              | AKT1                           | 7  |
| v-akt murine thymoma viral oncogene homolog 2                              | AKT2                           | 0  |
| 3-phosphoinositide dependent protein kinase-1                              | PDPK1                          | 2  |
| protein kinase, cAMP-dependent, catalytic, alpha                           | PRKACA                         | 21 |
| protein kinase C, epsilon                                                  | PRKCE                          | 0  |
| Rho-associated, coiled-coil containing protein kinase 2                    | ROCK2                          | 0  |
| ribosomal protein S6 kinase, 90kDa, polypeptide 3                          | RPS6KA3                        | 0  |
| serine/threonine kinase 32C                                                | STK32C                         | 0  |
| CAMK                                                                       |                                |    |
| checkpoint kinase 1                                                        | CHEK1                          | 0  |
| doublecortin-like kinase 1                                                 | DCLK1                          | 33 |
| serine/threonine kinase 11                                                 | STK11                          | 0  |
| mitogen-activated protein kinase-activated protein kinase 2                | MAPKAPK2                       | 21 |
| MAP/microtubule affinity-regulating kinase 3                               | MARK3                          | 2  |
| MAP kinase interacting serine/threonine kinase 1                           | MKNK1                          | 5  |
| MAP kinase interacting serine/threonine kinase 2                           | MKNK2                          | 15 |
| pim-1 oncogene                                                             | PIM1                           | 0  |
| pim-2 oncogene                                                             | PIM2                           | 6  |
| pim-3 oncogene                                                             | PIM3                           | 5  |
| NUAK family, SNF1-like kinase, 2                                           | NUAK2                          | 0  |
| testis-specific serine kinase 1B                                           | TSSK1B                         | 0  |
| CMGC                                                                       |                                |    |
| cyclin-dependent kinase 19                                                 | CDK19                          | 2  |
| cyclin-dependent kinase 2                                                  | CDK2                           | 4  |
| cyclin-dependent kinase 3                                                  | CDK3                           | 3  |
| cyclin-dependent kinase 7                                                  | CDK7                           | 3  |
| cyclin-dependent kinase 9                                                  | CDK9                           | 0  |
| dual-specificity tyrosine-(Y)-phosphorylation regulated kinase 1B          | DYRK1B                         | 3  |
| MAP/microtubule affinity-regulating kinase 3                               | MAPK3                          | 4  |
| glycogen synthase kinase 3 beta                                            | GSK3B                          | 8  |
| mitogen-activated protein kinase 8                                         | MAPK8                          | 14 |
| mitogen-activated protein kinase 9                                         | MAPK9                          | 4  |
| mitogen-activated protein kinase 10                                        | MAPK10                         | 14 |
| mitogen-activated protein kinase 14                                        | MAPK14                         | 3  |
| mitogen-activated protein kinase 11                                        | MAPK11                         | 0  |
| cyclin-dependent kinase 16                                                 | CDK16                          | 30 |
| polo-like kinase 1                                                         | PLK1                           | 11 |
| polo-like kinase 3                                                         | PLK3                           | 13 |
| polo-like kinase 4                                                         | PLK4                           | 28 |
| SFRS protein kinase 3                                                      | SRPK3                          | 21 |
| OTHER                                                                      |                                |    |
| aurora kinase A                                                            | AURKA                          | 20 |
| aurora kinase B                                                            | AURKB                          | 8  |
| conserved helix-loop-helix ubiquitous kinase                               | CHUK                           | 3  |
| inhibitor of kappa light polypeptide gene enhancer in B-cells, kinase beta | IKBKB                          | 12 |
| unc-51-like kinase 2                                                       | ULK2                           | 0  |
| ATYPICAL                                                                   |                                |    |
| coenzyme Q8A                                                               | CABC1                          | 11 |
| RIO kinase 2                                                               | RIOK2                          | 3  |
| LIPID                                                                      |                                |    |
| phosphoinositide-3-kinase, class 2, beta polypeptide                       | PIK3C2B                        | 2  |
| phosphoinositide-3-kinase, catalytic, alpha polypeptide                    | PIK3CA                         | 0  |
| phosphoinositide-3-kinase, catalytic, gamma polypeptide                    | PIK3CG                         | 0  |
| MUTANT                                                                     |                                |    |
| c-abl oncogene 1, receptor tyrosine kinase                                 | ABL1(E255K)-<br>phosphorylated | 0  |

|                                                               |                                |    |
|---------------------------------------------------------------|--------------------------------|----|
| c-abl oncogene 1, receptor tyrosine kinase                    | ABL1(T315I)-<br>phosphorylated | 10 |
| v-raf murine sarcoma viral oncogene homolog B1                | BRAF(V600E)                    | 9  |
| epidermal growth factor receptor                              | EGFR(L858R)                    | 29 |
| v-kit Hardy-Zuckerman 4 feline sarcoma viral oncogene homolog | KIT(D816V)                     | 8  |
| v-kit Hardy-Zuckerman 4 feline sarcoma viral oncogene homolog | KIT(V559D,T670I)               | 5  |

---

**Table S6. Detailed information for statistical analysis.**

| Figure No. | Result from statistical analysis                                                                                                                                                                                                                                                                                                                                                                                                                                                                                                                                                                                                                                                                                                                                                                                                                                                                                                                                                |
|------------|---------------------------------------------------------------------------------------------------------------------------------------------------------------------------------------------------------------------------------------------------------------------------------------------------------------------------------------------------------------------------------------------------------------------------------------------------------------------------------------------------------------------------------------------------------------------------------------------------------------------------------------------------------------------------------------------------------------------------------------------------------------------------------------------------------------------------------------------------------------------------------------------------------------------------------------------------------------------------------|
| 1B         | <p>WT + water (<math>16.0068 \pm 1.077</math>, <math>n=180</math>), APP/PS1 + water (<math>87.4866 \pm 2.946</math>, <math>n=289</math>), APP/PS1 + Selegiline 3D (<math>39.5503 \pm 2.691</math>, <math>n=119</math>), APP/PS1 + Selegiline 4W (<math>105.996 \pm 5.117</math>, <math>n=101</math>)</p> <p><i>Kruskal-Wallis</i> test with <i>Dunnnett's</i> multiple comparisons test</p> <p>Kruskal-Wallis statistics = 354.1</p> <p>WT + water vs. APP/PS1 + Water, <math>p &lt; 0.0001</math>;</p> <p>APP/PS1 + water vs. APP/PS1 + Selegiline 3D, <math>p &lt; 0.0001</math>;</p> <p>APP/PS1 + water vs. APP/PS1 + Selegiline 4W, <math>p = 0.1111</math></p>                                                                                                                                                                                                                                                                                                             |
| 1D         | <p>WT + water (<math>27.47 \pm 2.178</math>, <math>n=15</math>), APP/PS1 + water (<math>87.15 \pm 7.899</math>, <math>n=20</math>), APP/PS1 + Selegiline 3D (<math>62.53 \pm 5.079</math>, <math>n=15</math>), APP/PS1 + Selegiline 4W (<math>45.92 \pm 2.746</math>, <math>n=24</math>)</p> <p>One-way ANOVA with <i>Tukey's</i> multiple comparisons test</p> <p><math>F(3, 70) = 23.59</math>, <math>p &lt; 0.0001</math></p> <p>WT + water vs. APP/PS1 + water, <math>p &lt; 0.0001</math>;</p> <p>APP/PS1 + water vs. APP/PS1 + Selegiline 3D, <math>p = 0.0092</math>;</p> <p>APP/PS1 + water vs. APP/PS1 + Selegiline 4W, <math>p &lt; 0.0001</math></p>                                                                                                                                                                                                                                                                                                                 |
| 1E         | <p>WT + water (<math>1.789 \pm 0.2144</math>, <math>n=15</math>), APP/PS1 + water (<math>7.265 \pm 1.388</math>, <math>n=20</math>), APP/PS1 + Selegiline 3D (<math>4.233 \pm 0.8632</math>, <math>n=15</math>), APP/PS1 + Selegiline 4W (<math>4.072 \pm 0.6429</math>, <math>n=24</math>)</p> <p><i>Kruskal-Wallis</i> test with <i>Dunnnett's</i> multiple comparisons test</p> <p>Kruskal-Wallis statistics = 22.3</p> <p>WT + water vs. APP/PS1 + water, <math>p &lt; 0.0001</math>;</p> <p>APP/PS1 + water vs. APP/PS1 + Selegiline 3D, <math>p &gt; 0.9999</math>;</p> <p>APP/PS1 + water vs. APP/PS1 + Selegiline 4W, <math>p = 0.8297</math></p>                                                                                                                                                                                                                                                                                                                       |
| 1F         | <p>Acquisition:</p> <p>WT + water (<math>30.92 \pm 7.659</math>, <math>n=9</math>), APP/PS1 + water (<math>46.31 \pm 9.886</math>, <math>n=8</math>), APP/PS1 + Selegiline 3D (<math>33.46 \pm 7.607</math>, <math>n=8</math>), APP/PS1 + Selegiline 4W (<math>17.76 \pm 4.116</math>, <math>n=8</math>)</p> <p>Retention:</p> <p>WT + water (<math>428.3 \pm 72.65</math>, <math>n=9</math>), APP/PS1 + water (<math>111.2 \pm 41.86</math>, <math>n=8</math>), APP/PS1 + Selegiline 3D (<math>422.1 \pm 67.81</math>, <math>n=8</math>), APP/PS1 + Selegiline 4W (<math>209.3 \pm 57.79</math>, <math>n=8</math>)</p> <p><i>Kruskal-Wallis</i> test with <i>Dunnnett's</i> multiple comparisons test</p> <p>Kruskal-Wallis statistics = 13.59</p> <p>WT + water vs. APP/PS1 + Water, <math>p = 0.0152</math>;</p> <p>APP/PS1 + water vs. APP/PS1 + Selegiline 3D, <math>p = 0.0205</math>;</p> <p>APP/PS1 + water vs. APP/PS1 + Selegiline 4W, <math>p &gt; 0.9999</math></p> |
| 3F         | <p>WT + water (<math>483.8.3 \pm 25.87</math>, <math>n=44</math>), APP/PS1 + water (<math>654 \pm 29.49</math>, <math>n=55</math>), APP/PS1 + Selegiline 4W (<math>654.5 \pm 39.16</math>, <math>n=50</math>), APP/PS1 + KDS2010 4W (<math>486.8 \pm 43.39</math>, <math>n=46</math>)</p> <p><i>Kruskal-Wallis</i> test with <i>Dunnnett's</i> multiple comparisons test</p> <p>Kruskal-Wallis statistics = 19.68</p> <p>WT + water vs. APP/PS1 + water, <math>p = 0.0020</math>;</p> <p>WT + water vs. APP/PS1 + KDS2010 4W, <math>p &gt; 0.9999</math>;</p> <p>APP/PS1 + water vs. APP/PS1 + Selegiline 4W, <math>p &gt; 0.9999</math>;</p> <p>APP/PS1 + water vs. APP/PS1 + KDS2010 4W, <math>p = 0.0126</math></p>                                                                                                                                                                                                                                                          |
| 3H         | <p>WT + water (<math>7.167 \pm 1.956</math>, <math>n=10</math>), APP/PS1 + water (<math>16.41 \pm 1.916</math>, <math>n=8</math>), APP/PS1 + KDS2010 4W (<math>3.3 \pm 1.243</math>, <math>n=8</math>), APP/PS1 + Selegiline 4W (<math>17.71 \pm 4.122</math>, <math>n=11</math>), APP/PS1 + Selegiline 4W + AG (<math>2.467 \pm 0.8841</math>, <math>n=9</math>)</p> <p><i>Kruskal-Wallis</i> test with <i>Dunnnett's</i> multiple comparisons test</p> <p>Kruskal-Wallis statistics = 24.02</p> <p>APP/PS1 + water vs. APP/PS1 + KDS2010 4W, <math>p = 0.0282</math>;</p> <p>APP/PS1 + KDS2010 4W vs. APP/PS1 + Selegiline 4W, <math>p = 0.0178</math>;</p>                                                                                                                                                                                                                                                                                                                   |



| APP/PS1 + Selegiline 4W vs. APP/PS1 + Selegiline 4W+AG, $p = 0.0023$ |                                                                                                                                                                                                                                                                                                                                                                                                                                                                                                                                                                                                                                                                                                                                                                                                                                                                                                                                                                                                                         |
|----------------------------------------------------------------------|-------------------------------------------------------------------------------------------------------------------------------------------------------------------------------------------------------------------------------------------------------------------------------------------------------------------------------------------------------------------------------------------------------------------------------------------------------------------------------------------------------------------------------------------------------------------------------------------------------------------------------------------------------------------------------------------------------------------------------------------------------------------------------------------------------------------------------------------------------------------------------------------------------------------------------------------------------------------------------------------------------------------------|
| 4B                                                                   | <p>WT + water (<math>495.9 \pm 30.33</math>, <math>n=30</math>), APP/PS1 + water (<math>1156 \pm 42.93</math>, <math>n=73</math>), APP/PS1 + KDS2010 4W (<math>688.9 \pm 27.55</math>, <math>n=50</math>)<br/>           One-way ANOVA with <i>Tukey's</i> multiple comparisons test<br/> <math>F(2, 149) = 72.41</math>, <math>p &lt; 0.0001</math><br/>           WT + water vs. APP/PS1 + water, <math>p &lt; 0.0001</math>;<br/>           WT + water vs. APP/PS1 + KDS2010 4W, <math>p = 0.0107</math>;<br/>           APP/PS1 + water vs. APP/PS1 + KDS2010 4W, <math>p &lt; 0.0001</math></p>                                                                                                                                                                                                                                                                                                                                                                                                                    |
|                                                                      | <p>WT + water (<math>75.25 \pm 3.18</math>, <math>n=43</math>), APP/PS1 + water (<math>106.6 \pm 1.808</math>, <math>n=112</math>), APP/PS1 + KDS2010 4W (<math>78.87 \pm 1.867</math>, <math>n=85</math>)<br/>           Kruskal-Wallis test with <i>Dunnnett's</i> multiple comparisons test<br/>           Kruskal-Wallis statistics = 94.82<br/>           WT + water vs. APP/PS1 + water, <math>p &lt; 0.0001</math>;<br/>           WT + water vs. APP/PS1 + KDS2010 4W, <math>p &gt; 0.9999</math>;<br/>           APP/PS1 + water vs. APP/PS1 + KDS2010 4W, <math>p &lt; 0.0001</math></p>                                                                                                                                                                                                                                                                                                                                                                                                                      |
| 4C                                                                   | <p>WT + water (<math>36.89 \pm 3.195</math>, <math>n=18</math>), APP/PS1 + water (<math>93.88 \pm 5.23</math>, <math>n=33</math>), APP/PS1 + KDS2010 4W (<math>49.03 \pm 3.391</math>, <math>n=29</math>)<br/>           One-way ANOVA with <i>Tukey's</i> multiple comparisons test<br/> <math>F(2, 77) = 45.75</math>, <math>p &lt; 0.0001</math><br/>           WT + water vs. APP/PS1 + water, <math>p &lt; 0.0001</math>;<br/>           WT + water vs. APP/PS1 + KDS2010 4W, <math>p = 0.1947</math>;<br/>           APP/PS1 + water vs. APP/PS1 + KDS2010 4W, <math>p &lt; 0.0001</math></p>                                                                                                                                                                                                                                                                                                                                                                                                                     |
|                                                                      | <p>WT + water (<math>2.533 \pm 0.2713</math>, <math>n=18</math>), APP/PS1 + water (<math>6.017 \pm 0.6702</math>, <math>n=33</math>), APP/PS1+KDS2010 4W (<math>3.344 \pm 0.388</math>, <math>n=29</math>)<br/>           Kruskal-Wallis test with <i>Dunnnett's</i> multiple comparisons test<br/>           Kruskal-Wallis statistics = 22.45<br/>           WT + water vs. APP/PS1 + water, <math>p &lt; 0.0001</math>;<br/>           WT + water vs. APP/PS1 + KDS2010 4W, <math>p = 0.8135</math>;<br/>           APP/PS1 + water vs. APP/PS1 + KDS2010 4W, <math>p = 0.0009</math></p>                                                                                                                                                                                                                                                                                                                                                                                                                            |
| 4E                                                                   | <p>Acquisition:<br/>           WT + water (<math>26.27 \pm 4.744</math>, <math>n=15</math>), APP/PS1 + water (<math>17.76 \pm 4.116</math>, <math>n=8</math>), APP/PS1 + Selegiline 4W (<math>17.76 \pm 4.116</math>, <math>n=8</math>), APP/PS1 + KDS2010 4W (<math>49.93 \pm 21.46</math>, <math>n=8</math>)</p>                                                                                                                                                                                                                                                                                                                                                                                                                                                                                                                                                                                                                                                                                                      |
|                                                                      | <p>Retention:<br/>           WT + water (<math>489.6 \pm 22.15</math>, <math>n=15</math>), APP/PS1 + water (<math>291.3 \pm 52.68</math>, <math>n=8</math>), APP/PS1 + Selegiline 4W (<math>209.3 \pm 57.79</math>, <math>n=8</math>), APP/PS1+KDS2010 4W (<math>499.3 \pm 38.66</math>, <math>n=8</math>)<br/>           Kruskal-Wallis test with <i>Dunnnett's</i> multiple comparisons test<br/>           Kruskal-Wallis statistics = 22.59<br/>           WT + water vs. APP/PS1 + water, <math>p = 0.0103</math>;<br/>           WT + water vs. APP/PS1 + KDS2010 4W, <math>p &gt; 0.9999</math>;<br/>           APP/PS1 + water vs. APP/PS1 + Selegiline 4W, <math>p &gt; 0.9999</math>;<br/>           APP/PS1 + water vs. APP/PS1 + KDS2010 4W, <math>p = 0.0167</math></p>                                                                                                                                                                                                                                    |
| 4G                                                                   | <p>WT + water (<math>0.9692 \pm 0.02083</math>, <math>n=13</math>), APP/PS1 + water (<math>0.01667 \pm 0.009039</math>, <math>n=18</math>), APP/PS1 + Selegiline 2W (<math>0.6444 \pm 0.1617</math>, <math>n=9</math>), APP/PS1 + Selegiline 4W (<math>0.1583 \pm 0.0848</math>, <math>n=12</math>), APP/PS1 + KDS2010 2W (<math>0.9 \pm 0.1</math>, <math>n=10</math>), APP/PS1 + KDS2010 4W (<math>0.875 \pm 0.07258</math>, <math>n=8</math>)<br/>           Kruskal-Wallis test with <i>Dunnnett's</i> multiple comparisons test<br/>           Kruskal-Wallis statistics = 45.47<br/>           WT + water vs. APP/PS1 + water, <math>p &lt; 0.0001</math>;<br/>           APP/PS1 + water vs. APP/PS1 + Selegiline 2W, <math>p = 0.0726</math>;<br/>           APP/PS1 + water vs. APP/PS1 + Selegiline 4W, <math>p &gt; 0.9999</math>;<br/>           APP/PS1 + water vs. APP/PS1 + KDS2010 2W, <math>p &lt; 0.0001</math>;<br/>           APP/PS1 + water vs. APP/PS1 + KDS2010 4W, <math>p = 0.0010</math></p> |

|              |                                                                                                                                                                                                                                                                                                                                                                                                                                                                                                                                                                                                                                                                                                                                                                                                                                                                                                                                                 |
|--------------|-------------------------------------------------------------------------------------------------------------------------------------------------------------------------------------------------------------------------------------------------------------------------------------------------------------------------------------------------------------------------------------------------------------------------------------------------------------------------------------------------------------------------------------------------------------------------------------------------------------------------------------------------------------------------------------------------------------------------------------------------------------------------------------------------------------------------------------------------------------------------------------------------------------------------------------------------|
| 5B           | <p>Latency-Acquisition Test;<br/> One-way repeated measures ANOVA with <i>Fisher's LSD</i> post-hoc analysis<br/> <math>F(2,101) = 28.789, p &lt; 0.001</math><br/> WT + water vs. APP/PS1 + water, <math>p &lt; 0.001</math>;<br/> WT + water vs. APP/PS1 + KDS2010, <math>p &lt; 0.001</math>;<br/> APP/PS1 + water vs. APP/PS1 + KDS2010, <math>p = 0.067</math></p> <p>One-way ANOVA with <i>Fisher's LSD</i> post-hoc analysis (for each day)<br/> Day 1–5: not significant;<br/> Day 6: APP/PS1 + water vs. APP/PS1 + KDS2010, <math>p = 0.016</math>;<br/> Day 7: APP/PS1 + water vs. APP/PS1 + KDS2010, <math>p &lt; 0.001</math></p>                                                                                                                                                                                                                                                                                                   |
| 5C           | <p>Probe Test;<br/> One-way ANOVA with <i>Fisher's LSD</i> post-hoc test<br/> WT + water, <math>F(3,28) = 10.560, p &lt; 0.001</math>;<br/> APP/PS1 + water, <math>F(3,36) = 0.232, p = 0.874</math>;<br/> APP/PS1 + KDS2010, <math>F(3,28) = 14.779, p &lt; 0.001</math></p>                                                                                                                                                                                                                                                                                                                                                                                                                                                                                                                                                                                                                                                                   |
| 5D           | <p>Latency-Reversal Test;<br/> One-way repeated measures ANOVA with <i>Fisher's LSD</i> post-hoc analysis<br/> <math>F(2,101) = 12.963, p &lt; 0.001</math><br/> WT + water vs. APP/PS1 + water, <math>p &lt; 0.001</math>;<br/> WT + water vs. APP/PS1 + KDS2010, <math>p = 0.019</math>;<br/> APP/PS1 + water vs. APP/PS1 + KDS2010, <math>p = 0.012</math></p> <p>One-way ANOVA with <i>Fisher's LSD</i> post-hoc analysis (for each day)<br/> Day 1–2: not significant;<br/> Day 3: APP/PS1 + water vs. APP/PS1 + KDS2010, <math>p = 0.002</math></p>                                                                                                                                                                                                                                                                                                                                                                                       |
| Supple<br>6B | <p>Acquisition:<br/> WT + water (<math>30.92 \pm 7.659, n=9</math>), APP/PS1 + water (<math>46.31 \pm 9.886, n=8</math>), APP/PS1 + KDS2010 3D (<math>60.58 \pm 16.69, n=8</math>)</p> <p>Retention:<br/> WT + water (<math>428.3 \pm 72.65, n=9</math>), APP/PS1 + water (<math>111.2 \pm 41.86, n=8</math>), APP/PS1+KDS2010 3D (<math>418.3 \pm 78.46, n=8</math>)</p> <p>One-way ANOVA with <i>Tukey's</i> multiple comparisons test<br/> <math>F(2, 22) = 7.106, p = 0.0042</math><br/> WT + water vs. APP/PS1 + water, <math>p = 0.0074</math>;<br/> APP/PS1 + water vs. APP/PS1 + KDS2010 3D, <math>p = 0.0117</math></p>                                                                                                                                                                                                                                                                                                                |
| Supple<br>7B | <p>Acquisition:<br/> WT + water (<math>64.26 \pm 9.091, n=21</math>), APP/PS1 + water (<math>40.37 \pm 7.054, n=16</math>), APP/PS1+ KDS2010 1 mg/kg (<math>29.88 \pm 4.766, n=11</math>), APP/PS1 + KDS2010 10 mg/kg (<math>33.22 \pm 6.943, n=9</math>)</p> <p>Retention:<br/> WT + water (<math>454.4 \pm 31.06, n=21</math>), APP/PS1 + water (<math>83.76 \pm 13.28, n=16</math>), APP/PS1+KDS2010 1 mg/kg (<math>254.2 \pm 66.54, n=11</math>), APP/PS1+KDS2010 10 mg/kg (<math>313.7 \pm 66.47, n=9</math>)</p> <p>One-way ANOVA with <i>Tukey's</i> multiple comparisons test<br/> <math>F(3, 53) = 17.88, p &lt; 0.0001</math><br/> WT + water vs. APP/PS1 + water, <math>p &lt; 0.0001</math>;<br/> WT + water vs. APP/PS1 + KDS2010 10 mg/kg, <math>p = 0.1114</math>;<br/> APP/PS1 + water vs. APP/PS1 + KDS2010 1 mg/kg, <math>p = 0.0323</math>;<br/> APP/PS1 + water vs. APP/PS1 + KDS2010 10 mg/kg, <math>p = 0.0039</math></p> |
| Supple<br>7D | <p>WT + water (<math>7.167 \pm 1.956, n=6</math>), APP/PS1 + water (<math>16.41 \pm 1.916, n=8</math>), APP/PS1 + KDS2010 1 mg/kg (<math>6.000 \pm 2.066, n=6</math>), APP/PS1+KDS2010 10 mg/kg (<math>6.000 \pm 1.643, n=5</math>)</p> <p>One-way ANOVA with <i>Dunnnett's</i> multiple comparisons test<br/> <math>F(3, 21) = 7.654, p = 0.0012</math><br/> WT + water vs. APP/PS1 + water, <math>p = 0.0085</math>;</p>                                                                                                                                                                                                                                                                                                                                                                                                                                                                                                                      |

---

APP/PS1 + water vs. APP/PS1 + KDS2010 1 mg/kg,  $p = 0.0045$ ;  
APP/PS1 + water vs. APP/PS1 + KDS2010 10 mg/kg,  $p = 0.0061$

---

Supple  
8B

Latency-Acquisition Test;  
Two-way repeated measures ANOVA  
Genotype effect:  $F(1,116) = 71.076, p < 0.001$   
Drug effect:  $F(1,116) = 7.844, p = 0.006$   
Genotype \* Drug interaction:  $F(1,116) = 11.498, p = 0.001$   
One-way ANOVA with *Fisher's LSD* post-hoc analysis  
WT + water vs. WT + KDS2010,  $p = 0.686$ ;  
WT + water vs. APP/PS1 + water,  $p < 0.001$ ;  
WT + KDS2010 vs. APP/PS1 + water,  $p < 0.001$ ;  
WT + KDS2010 vs. APP/PS1 + KDS2010,  $p < 0.001$ ;  
APP/PS1 + water vs. APP/PS1 + KDS2010,  $p < 0.001$

---

Supple  
8C

Swim speed-Acquisition Test  
Two-way repeated measures ANOVA  
Genotype effect:  $F(1,116) = 1.328, p = 0.252$   
Drug effect:  $F(1,116) = 0.035, p = 0.851$   
Genotype \* Drug interaction:  $F(1,116) = 0.001, p = 0.979$   
One-way ANOVA with *Fisher's LSD* post-hoc analysis  
WT + water vs. WT + KDS2010,  $p = 0.912$ ;  
WT + water vs. APP/PS1 + water,  $p = 0.441$ ;  
WT + water vs. APP/PS1 + KDS2010,  $p = 0.331$ ;  
WT + KDS2010 vs. APP/PS1 + water,  $p = 0.509$ ;  
WT + KDS2010 vs. APP/PS1 + KDS2010,  $p = 0.392$ ;  
APP/PS1 + water vs. APP/PS1 + KDS2010,  $p = 0.876$

---

Supple  
8D

Swim speed-Acquisition Test;  
Day 6;  
One-way ANOVA with *Tukey's* multiple comparisons test  
 $F(2, 23) = 3.227, p = 0.0582$   
APP/PS1 + water vs. APP/PS1 + KDS2010,  $p = 0.067$   
Day 7;  
One-way ANOVA with *Tukey's* multiple comparisons test  
 $F(2, 23) = 3.227, p = 0.9492$   
APP/PS1 + water vs. APP/PS1 + KDS2010,  $p = 0.3706$

---

Swim speed-Reversal Test;  
Day 10;  
*Kruskal-Wallis* test with *Dunnnett's* multiple comparisons test  
Kruskal-Wallis statistics = 4.762  
APP/PS1 + water vs. APP/PS1 + KDS2010,  $p = 0.0979$

---

**Table S7. Primer sequences for each enzyme (F: forward primer and R: reverse primer).**

| Gene         | Gene ID | Species             | Primer sequence |                              |
|--------------|---------|---------------------|-----------------|------------------------------|
| <i>MAOB</i>  | 109731  | <i>Mus musculus</i> | F               | 5'- AGTTGAGCGGCTGATACT -3'   |
|              |         |                     | R               | 5'- TGGCCATCTCATCCATTGT -3'  |
| <i>DAO</i>   | 13142   | <i>Mus musculus</i> | F               | 5'- CACTCGCTTACAAACCCACC -3' |
|              |         |                     | R               | 5'- TCAAGTGTGGGCTGGACTAG -3' |
| <i>GAD65</i> | 14417   | <i>Mus musculus</i> | F               | 5'- GGGATGTCAACTACGCGTTT -3' |
|              |         |                     | R               | 5'- CATTGGGGTAATGGAAATCG -3' |
| <i>GAD67</i> | 14415   | <i>Mus musculus</i> | F               | 5'- CACAACTCAGCGGCATAGA -3'  |
|              |         |                     | R               | 5'- CTGGAAGAGGTAGCCTGCAC -3' |

**Additional data in 2-week toxicity: body weight changes, hematology, coagulation value, urinalysis value and organ weight changes.**

**A**

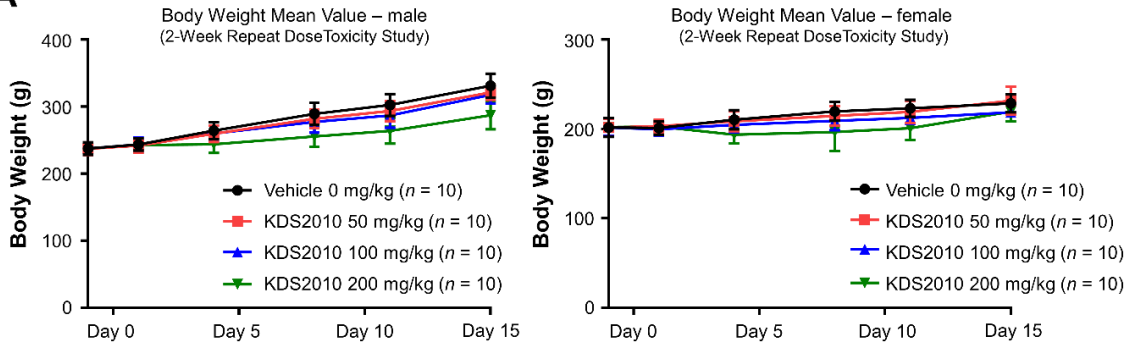

**B**

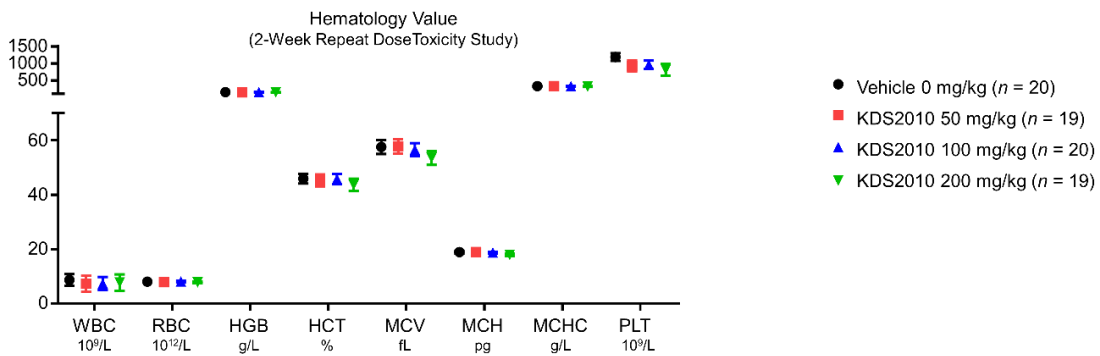

**C**

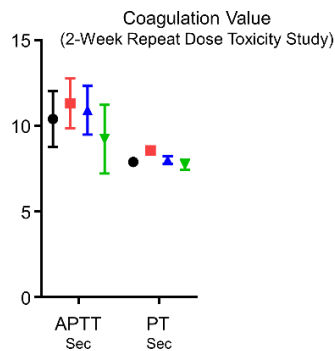

**D**

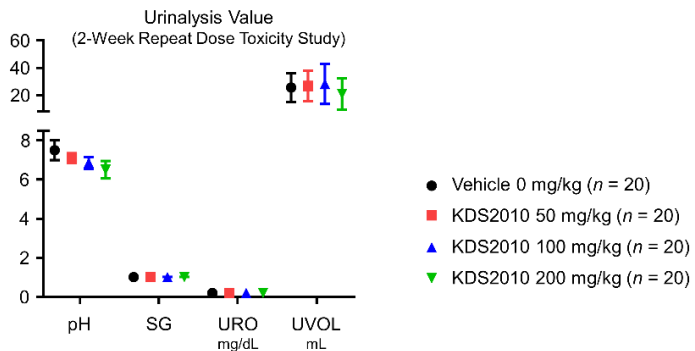

**E**

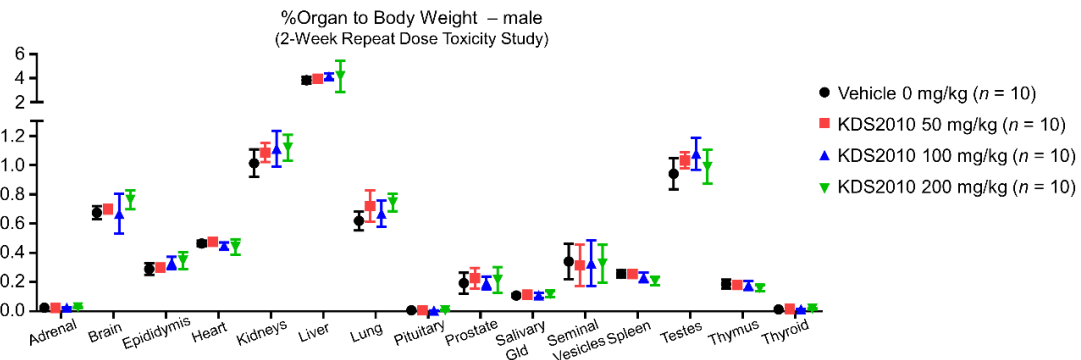

# <sup>1</sup>H and <sup>13</sup>C-NMR spectra

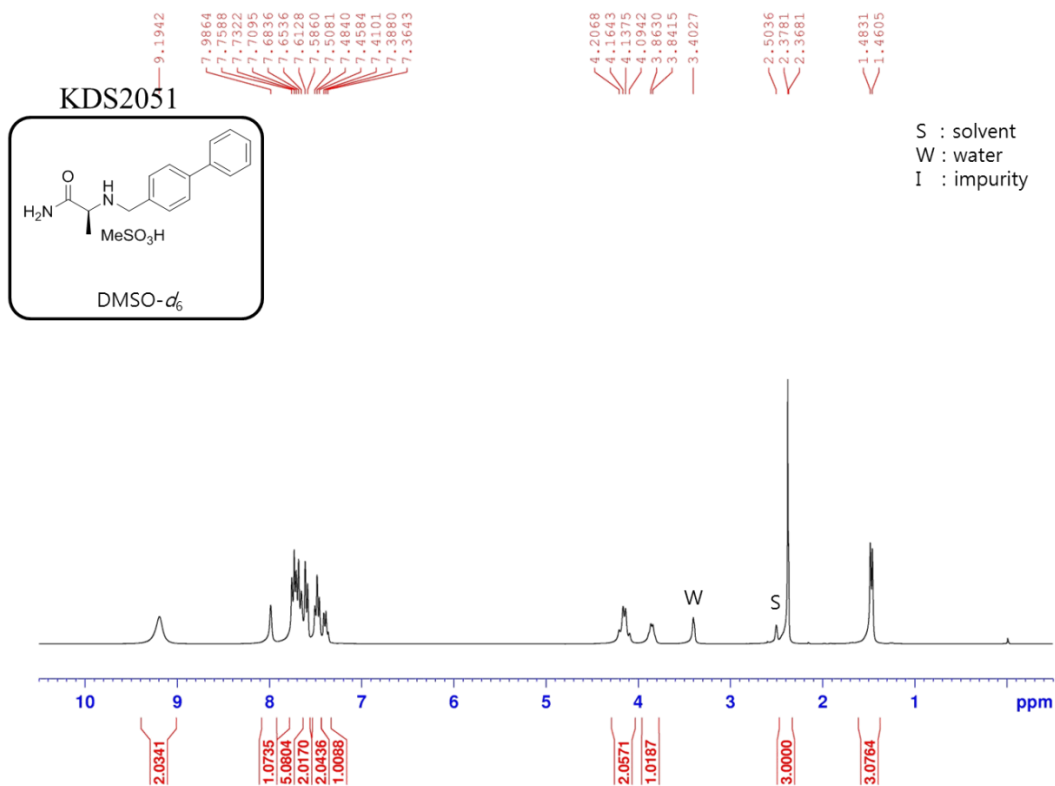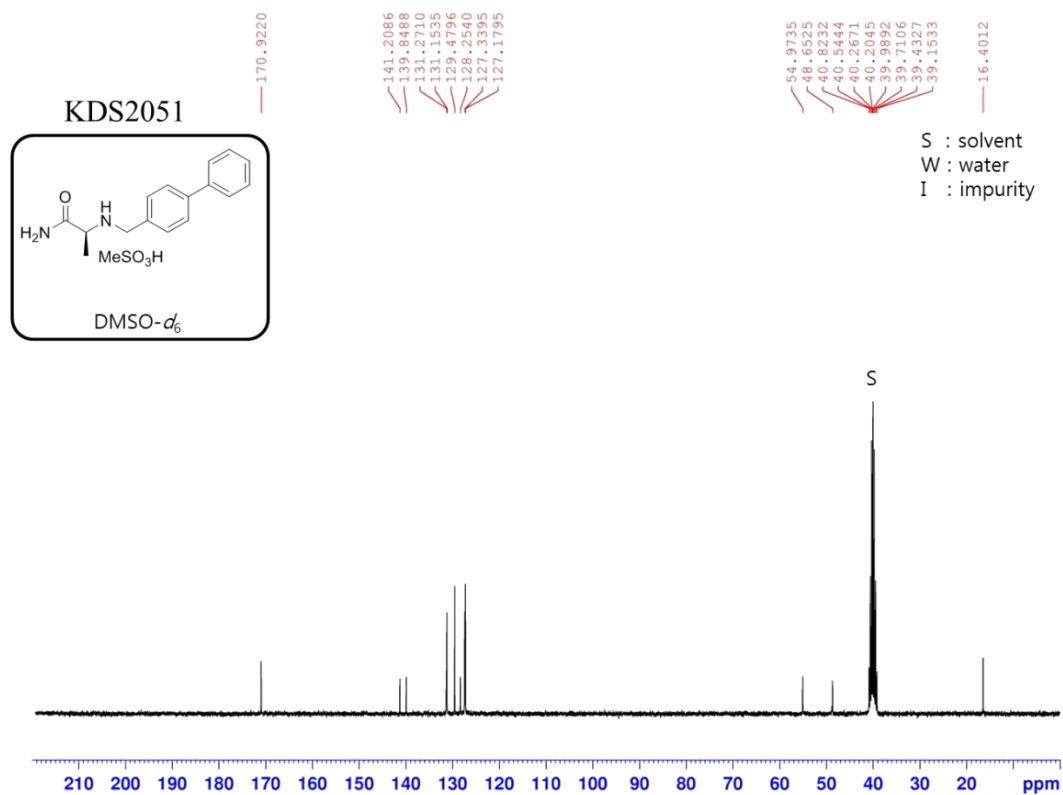

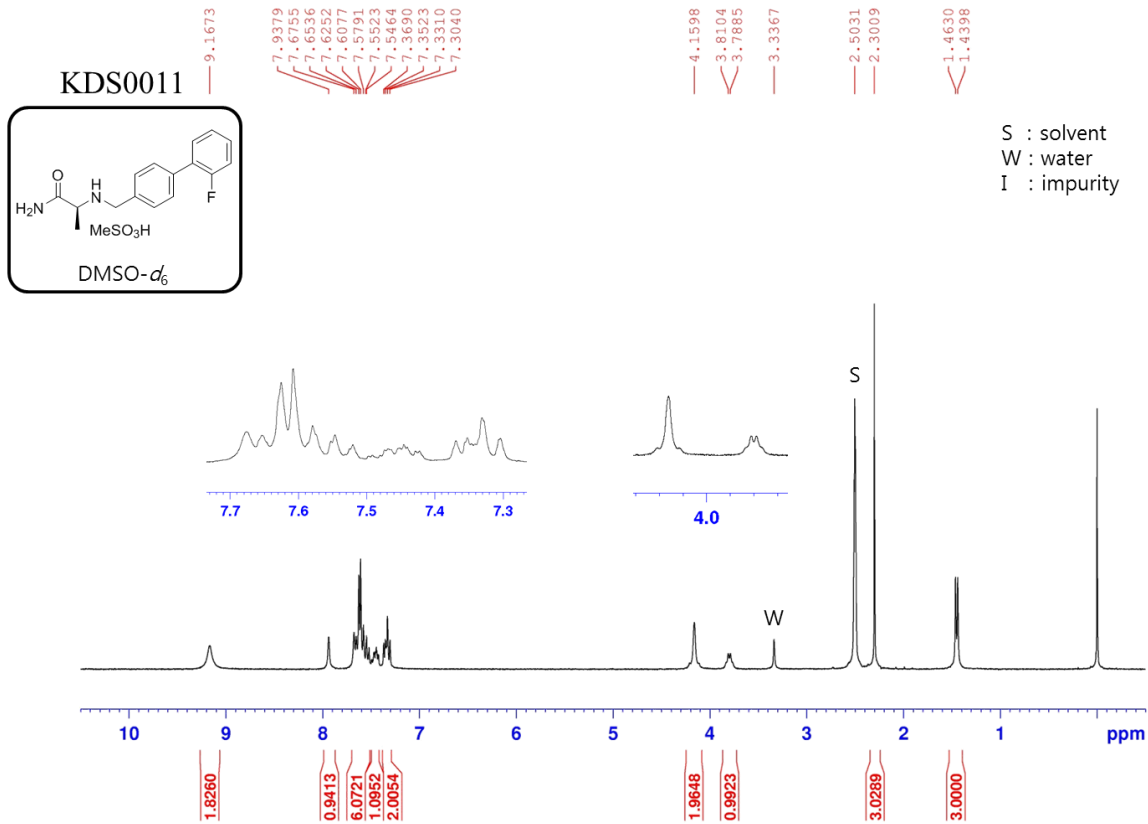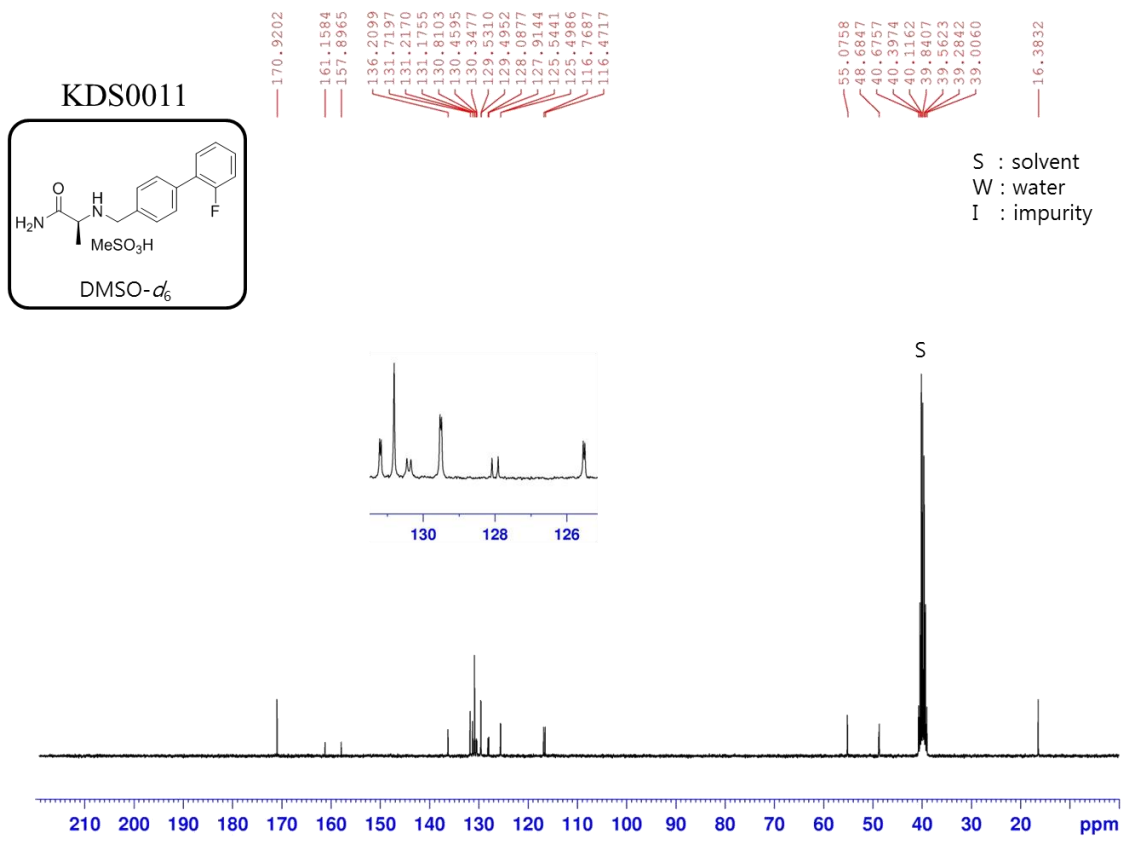

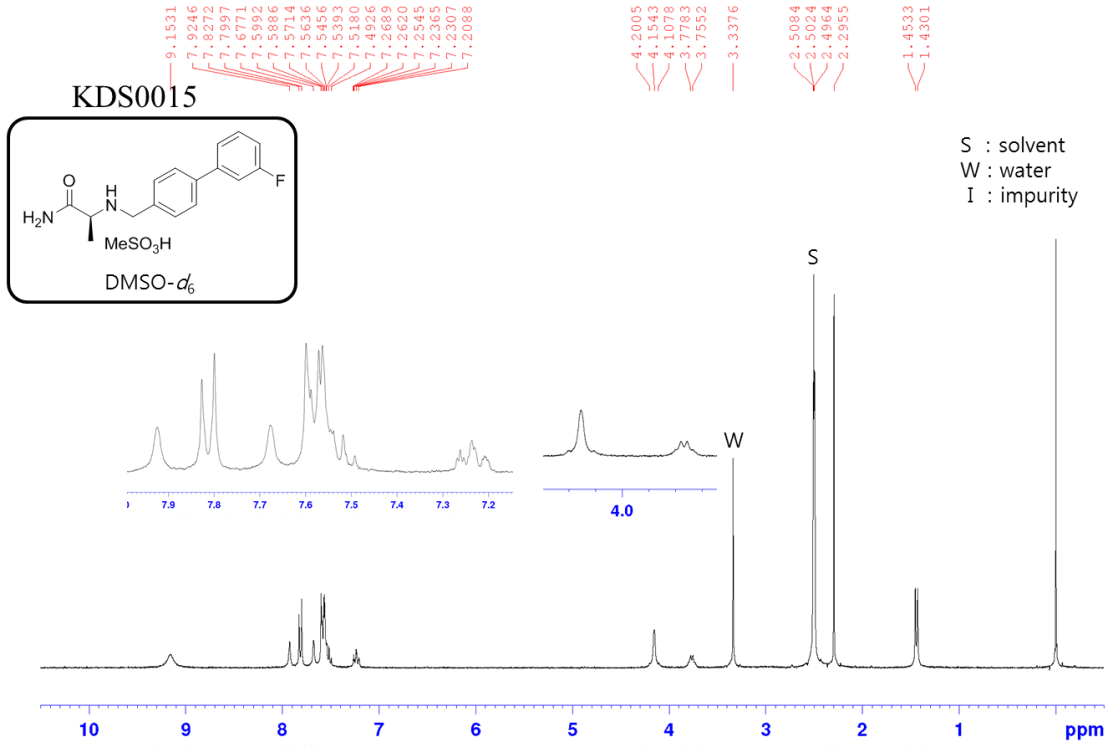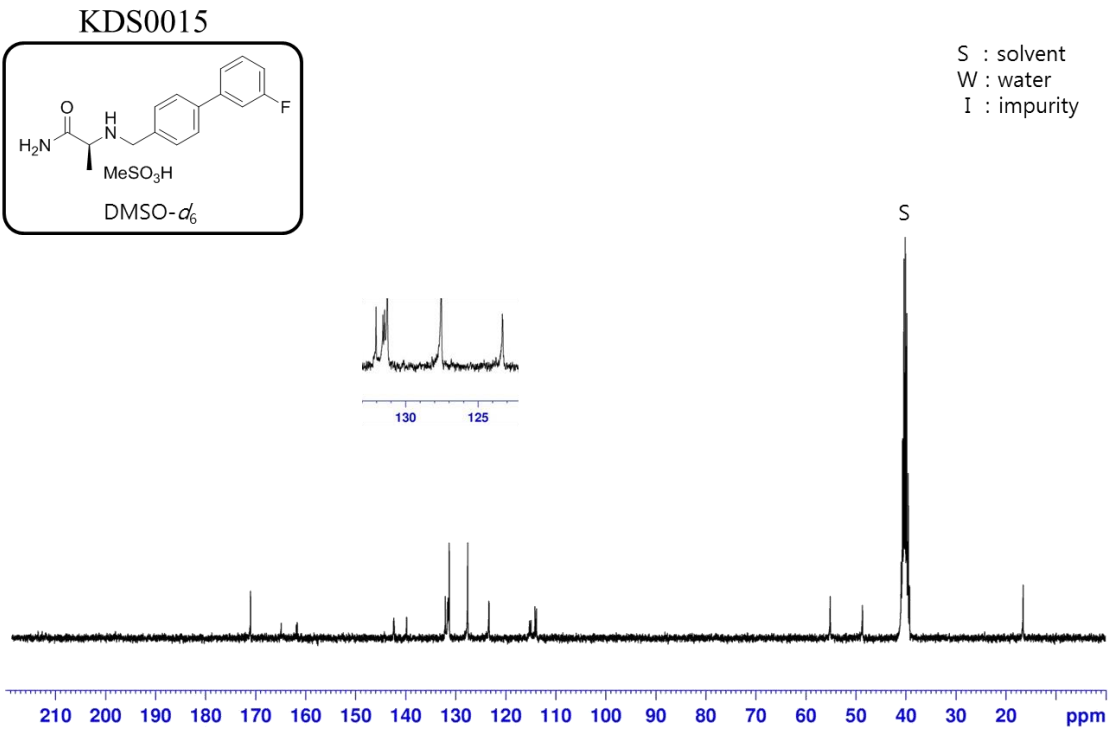



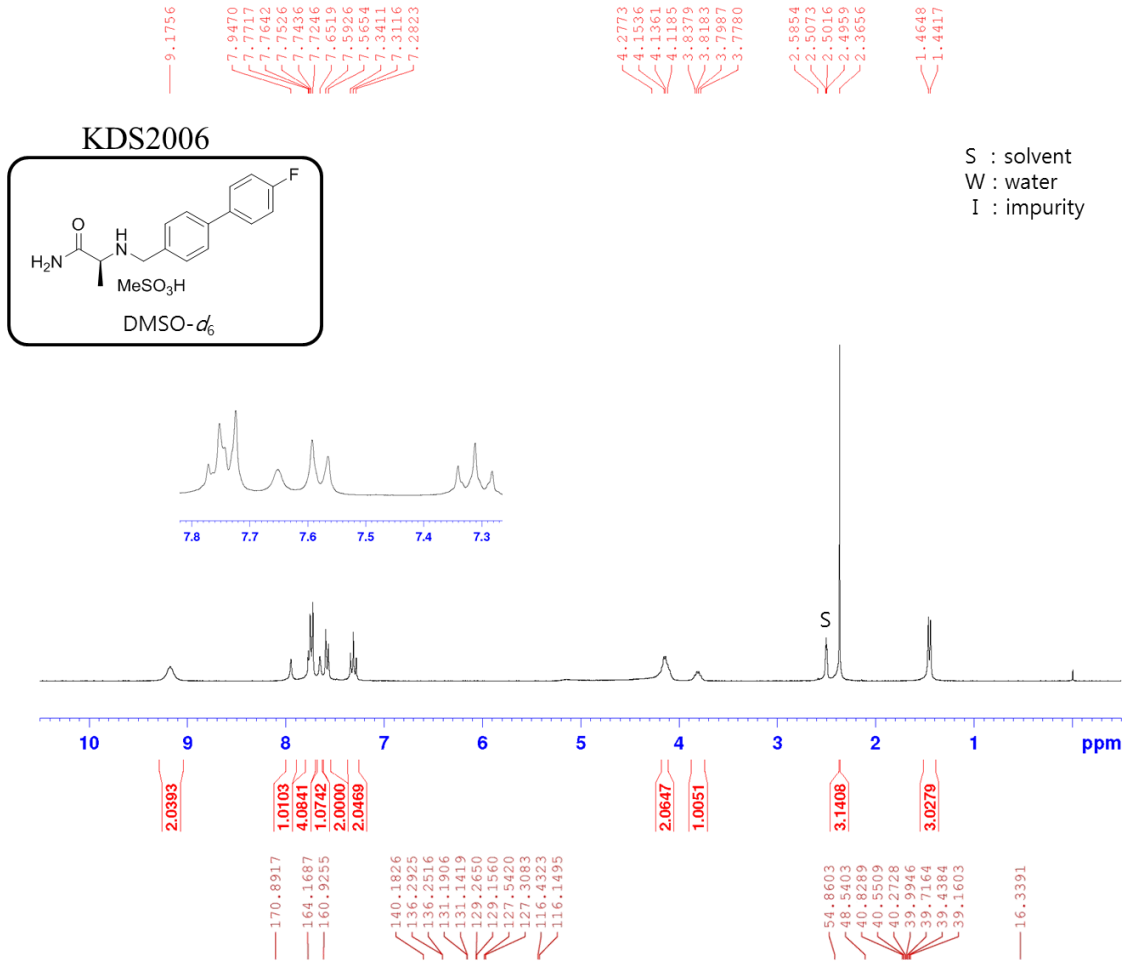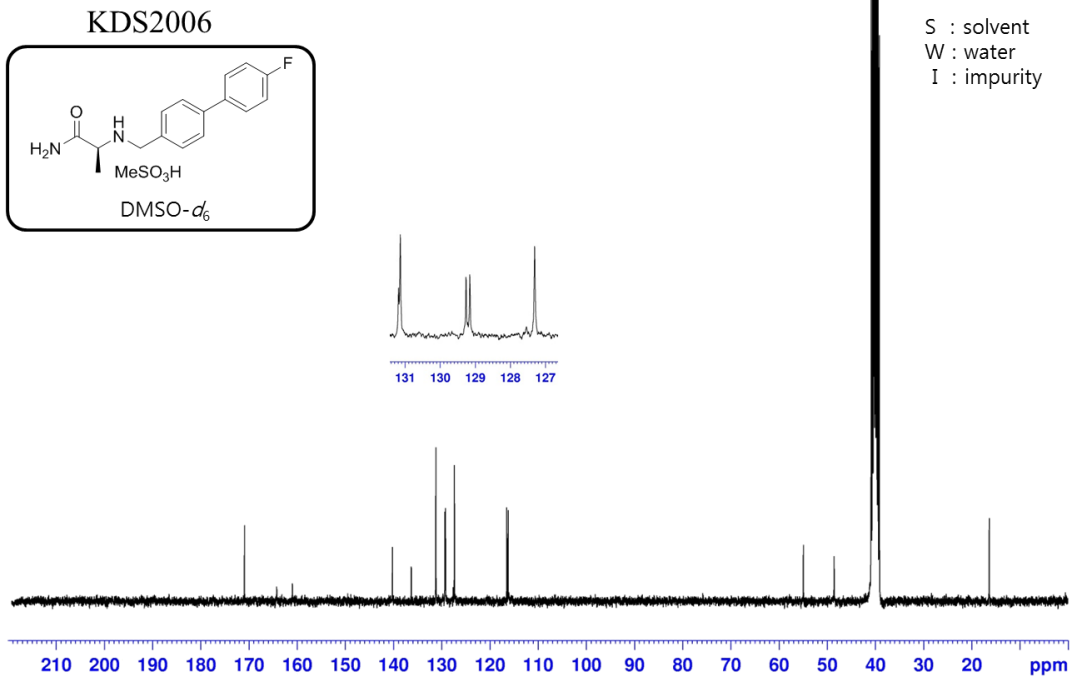

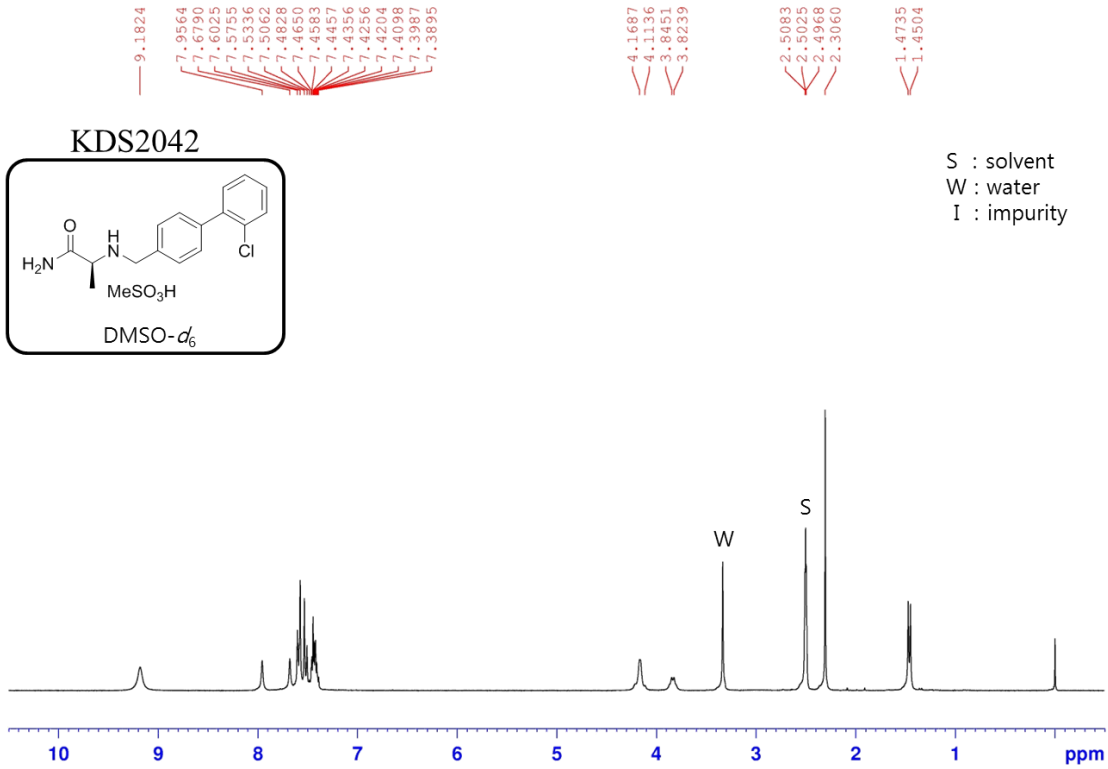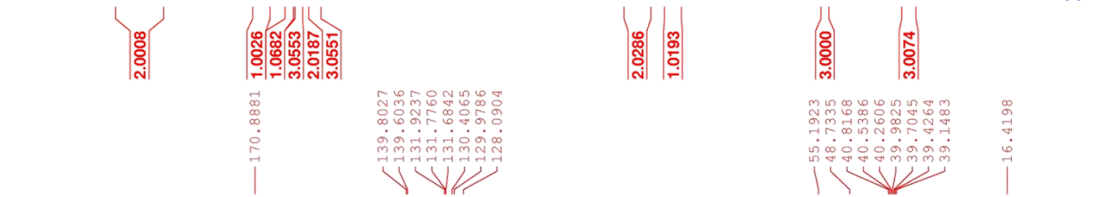

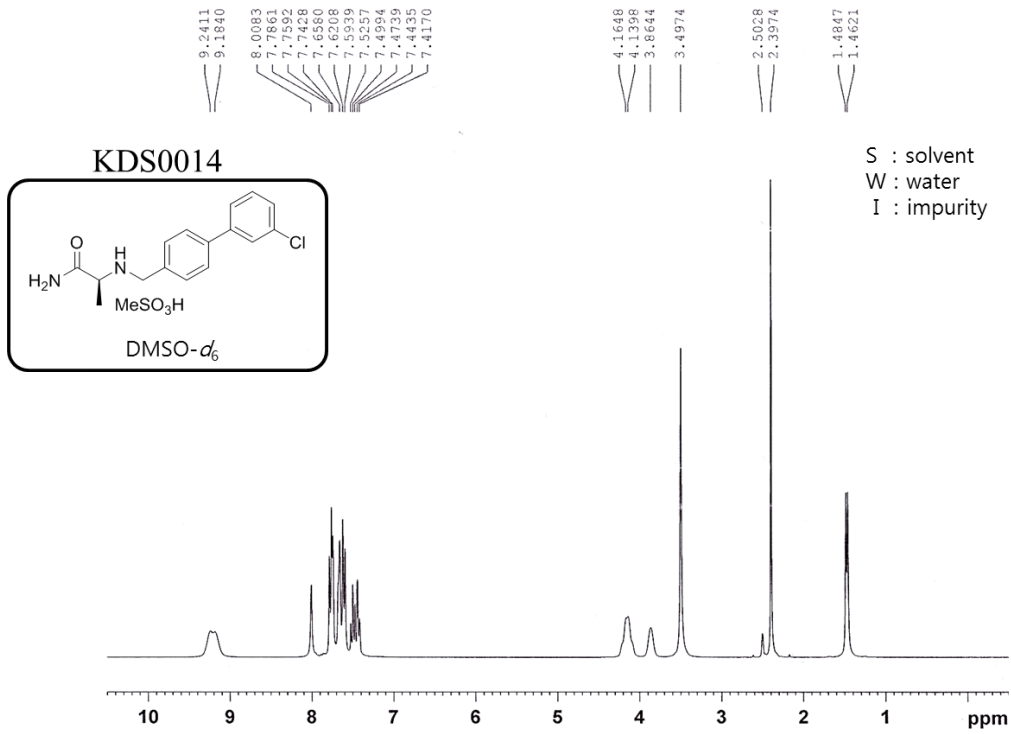

9.2411  
9.1840  
8.0083  
7.7861  
7.7592  
7.7428  
7.6560  
7.6208  
7.5939  
7.5257  
7.4994  
7.4739  
7.4435  
7.4170

4.1668  
4.1398  
3.8644  
3.4974  
2.5028  
2.3974  
1.4847  
1.4621

2.0049  
1.0245  
3.0415  
1.9616  
2.0228  
1.0532  
1.0504

2.0036  
1.0362  
3.0000  
3.0490

170.9313  
141.9586  
139.5470  
134.2883  
132.0013  
131.3266  
128.0773  
127.4855  
126.8564  
125.8881  
55.0754  
48.6111  
40.7426  
40.4623  
39.8072  
39.6288  
39.3506  
39.0721  
16.4051

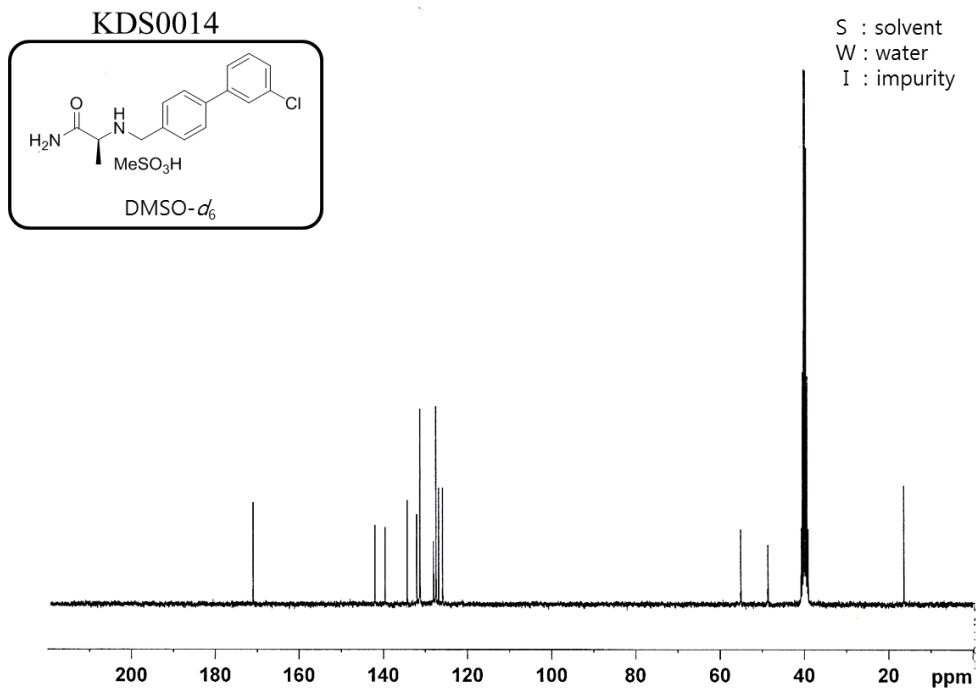

170.9313

141.9586  
139.5470  
134.2883  
132.0013  
131.3266  
128.0773  
127.4855  
126.8564  
125.8881

55.0754  
48.6111  
40.7426  
40.4623  
39.8072  
39.6288  
39.3506  
39.0721

16.4051

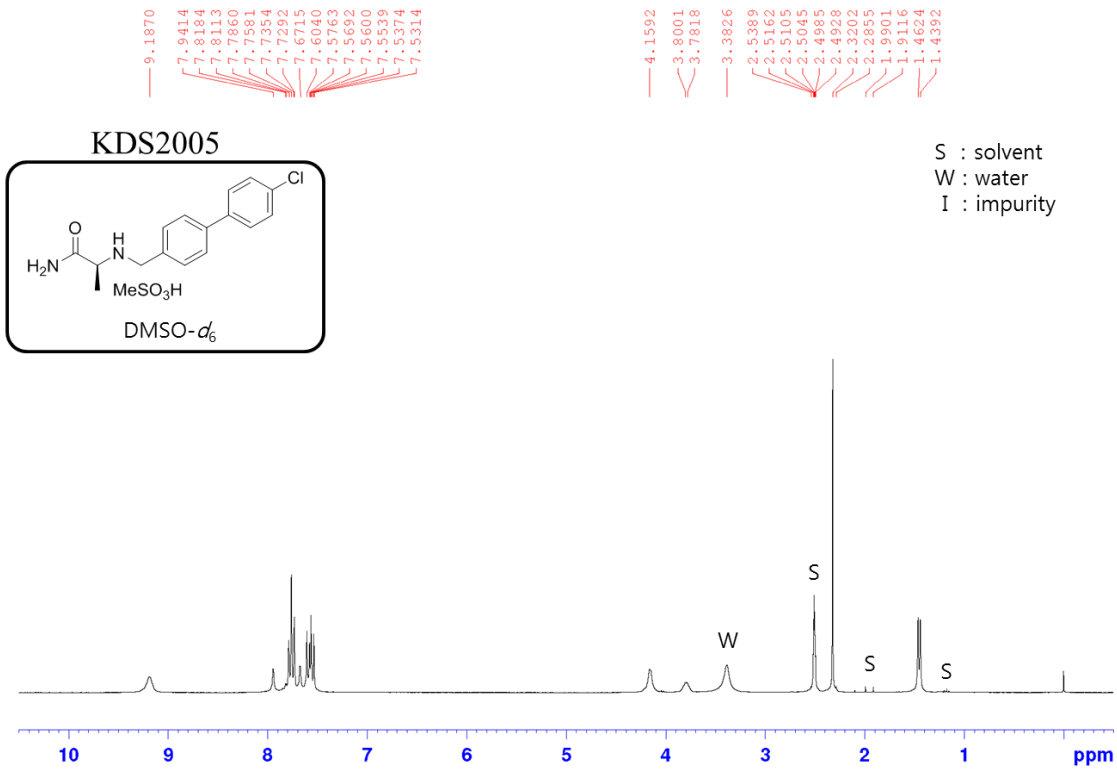

9.1870  
7.9414  
7.8184  
7.8113  
7.7860  
7.7581  
7.7354  
7.7292  
7.6715  
7.6040  
7.5763  
7.5692  
7.5600  
7.5539  
7.5374  
7.5314

4.1592  
3.8001  
3.7818  
3.3826  
2.5389  
2.5182  
2.5102  
2.5105  
2.5095  
2.4985  
2.4968  
2.3202  
2.2855  
1.9901  
1.9116  
1.4624  
1.4352

1.8874  
1.0438  
1.0689  
4.0436  
170.9139  
139.8544  
138.6182  
133.1936  
131.6524  
131.1926  
129.4434  
128.9608  
127.3205

2.0921  
1.0000  
3.0626  
54.8923  
48.5377  
40.8507  
40.5726  
40.2946  
40.0166  
39.7383  
39.4604  
39.1827  
16.3563

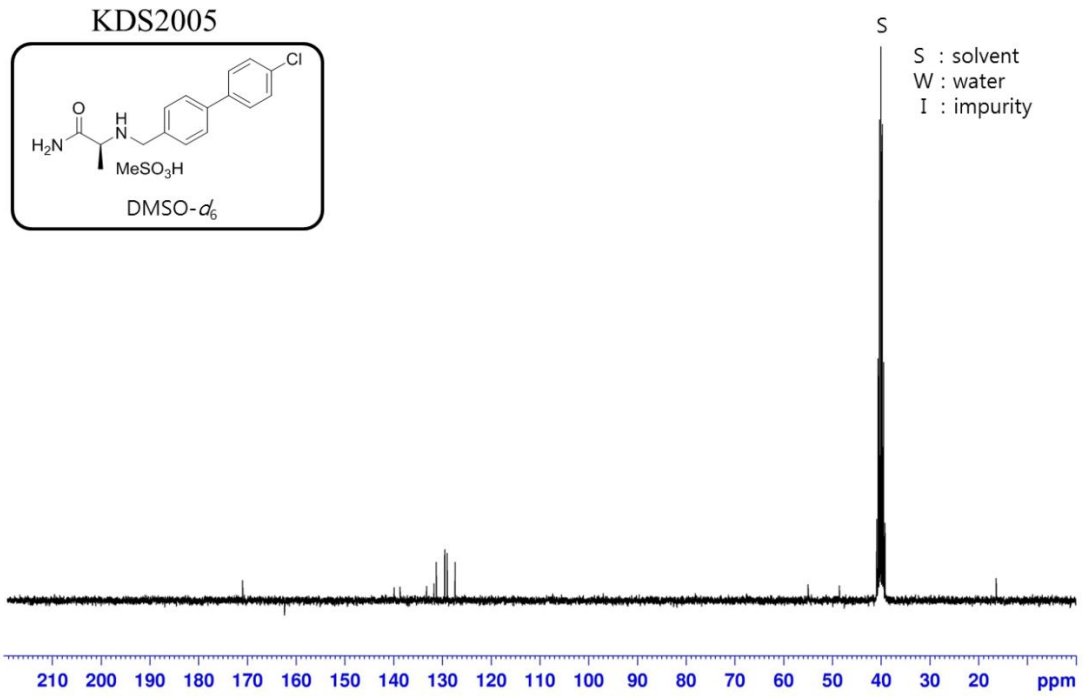

S : solvent  
W : water  
I : impurity

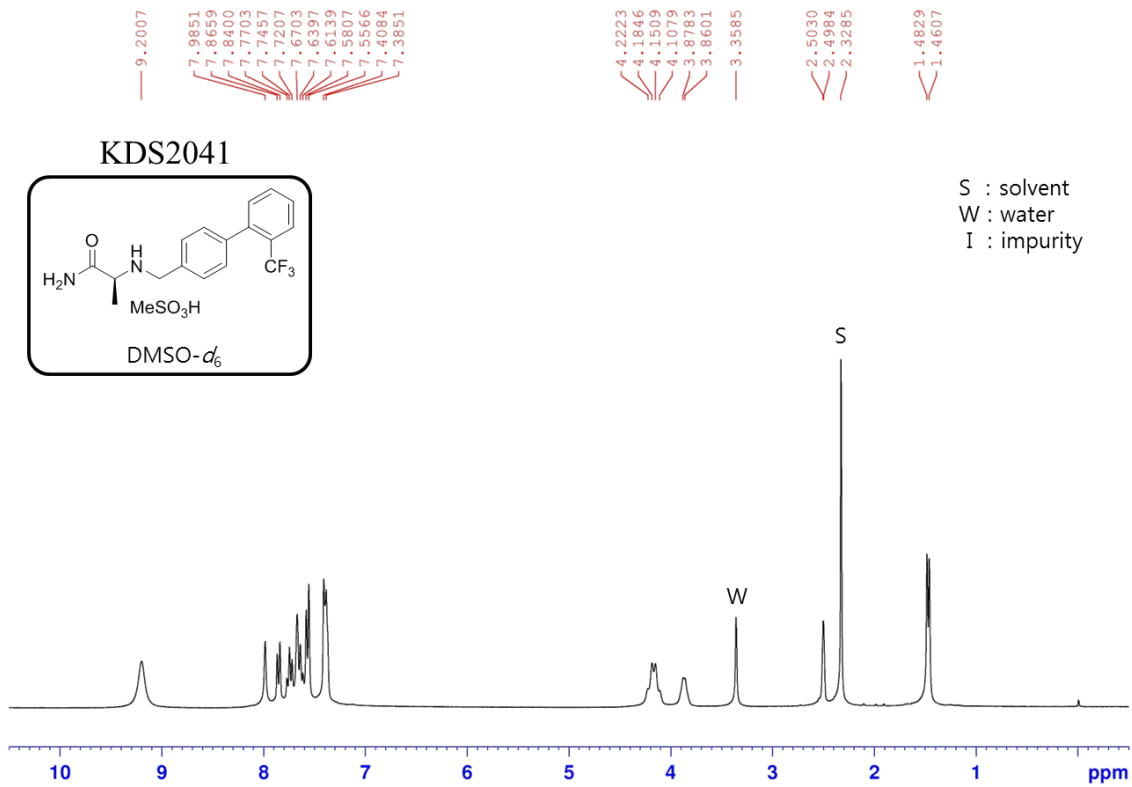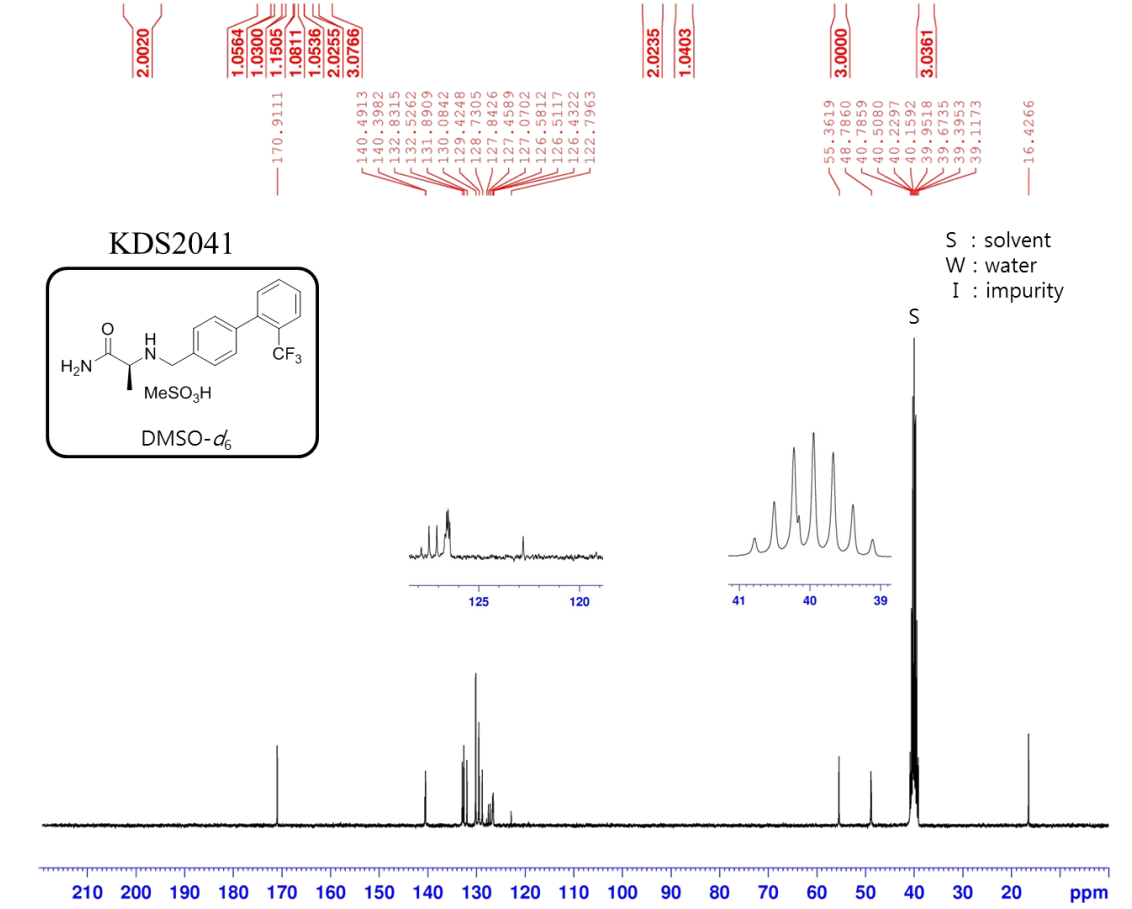

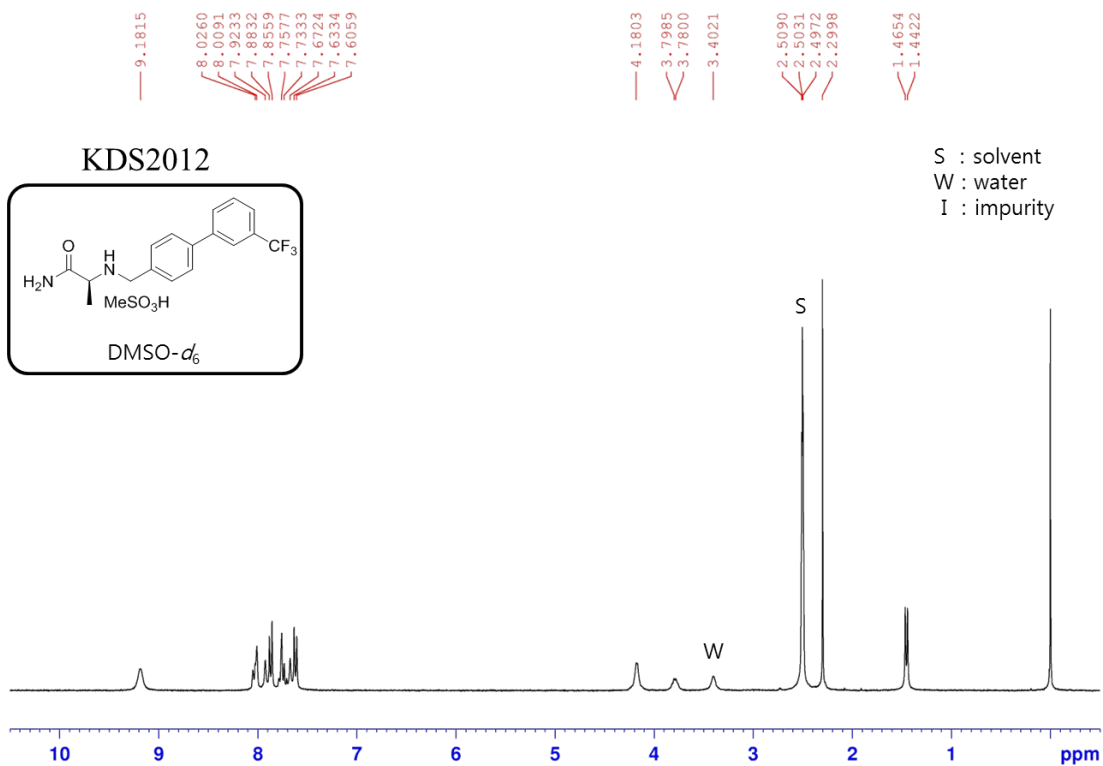

9.1815  
 8.0260  
 8.0091  
 7.9233  
 7.8832  
 7.8559  
 7.7577  
 7.7333  
 7.6724  
 7.6334  
 7.6059

4.1803  
 3.7985  
 3.7800  
 3.4021  
 2.5090  
 2.5031  
 2.4972  
 2.2998  
 1.4654  
 1.4422

2.0000  
 2.0949  
 1.0886  
 2.2039  
 2.1917  
 1.0867  
 2.2073  
 170.9656  
 140.8629  
 139.4700  
 132.1809  
 131.3093  
 130.9417  
 130.5985  
 130.5228  
 130.1025  
 129.6839  
 127.5799  
 126.4223  
 124.7681  
 123.4836  
 123.4357  
 122.8128  
 119.2004

2.0470  
 1.0510  
 3.0478  
 3.0022  
 55.1550  
 48.6443  
 40.6916  
 40.4133  
 40.1187  
 39.8570  
 39.5790  
 39.3007  
 39.0220  
 16.4009

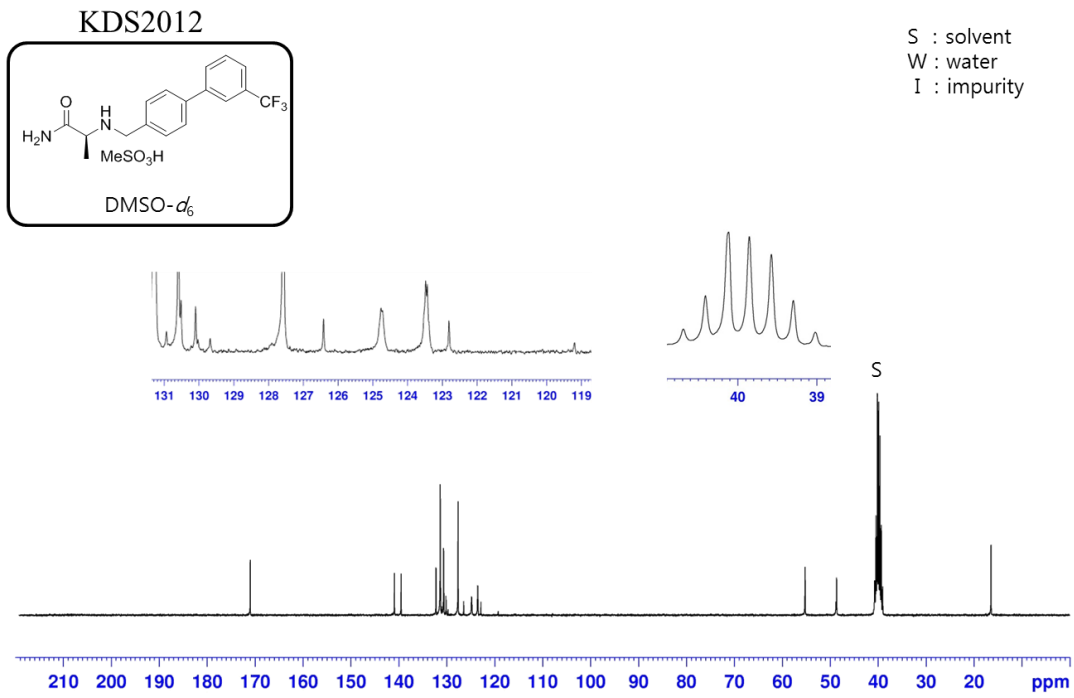

170.9656  
 140.8629  
 139.4700  
 132.1809  
 131.3093  
 130.9417  
 130.5985  
 130.5228  
 130.1025  
 129.6839  
 127.5799  
 126.4223  
 124.7681  
 123.4836  
 123.4357  
 122.8128  
 119.2004

55.1550  
 48.6443  
 40.6916  
 40.4133  
 40.1187  
 39.8570  
 39.5790  
 39.3007  
 39.0220

210 200 190 180 170 160 150 140 130 120 110 100 90 80 70 60 50 40 30 20 ppm

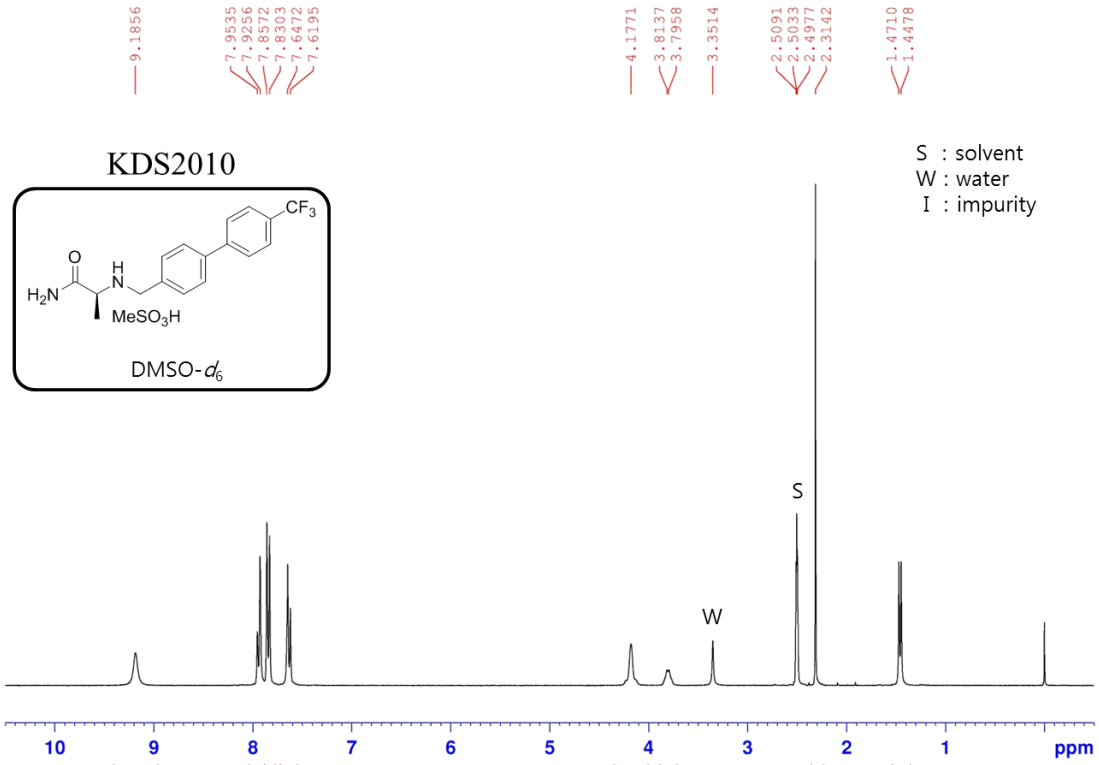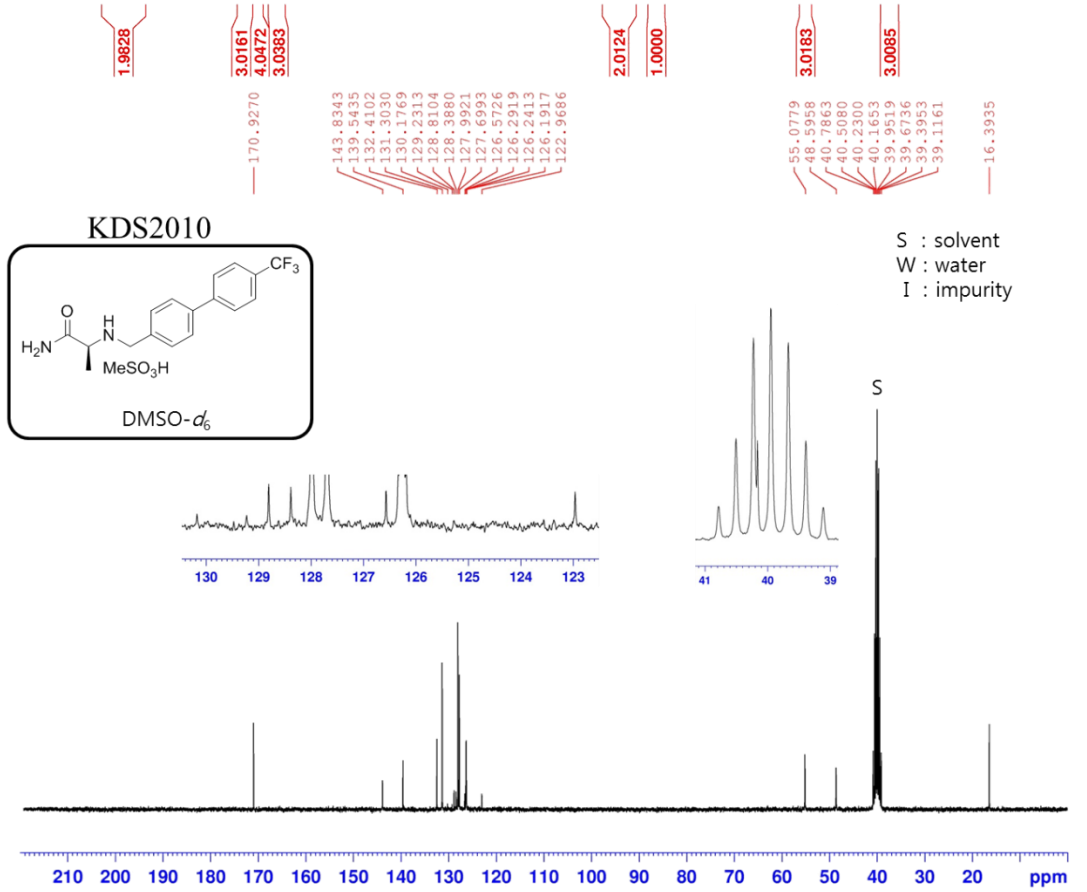

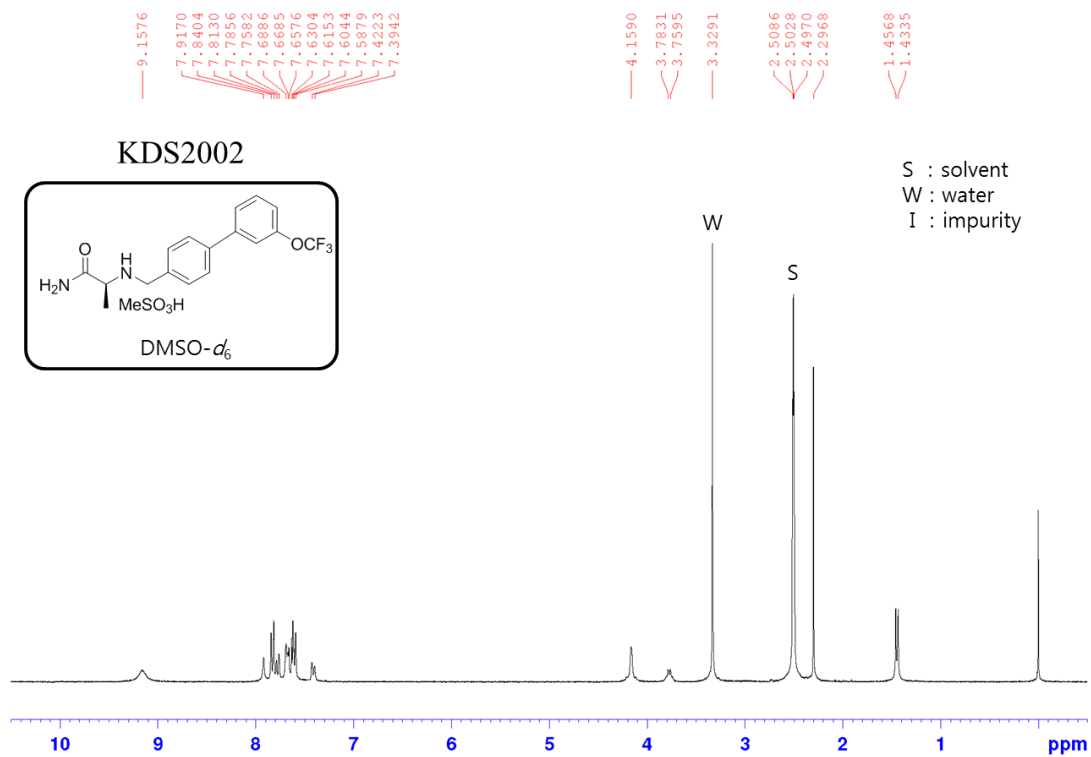

9.1576  
7.9170  
7.8404  
7.8130  
7.7856  
7.7582  
7.6886  
7.6685  
7.6576  
7.6304  
7.6153  
7.6044  
7.5879  
7.4223  
7.3942

4.1590  
3.7831  
3.7595  
3.3291  
2.5086  
2.5028  
2.4970  
2.2968  
1.4568  
1.4335

1.9641  
1.0968  
2.0161  
1.0563  
2.0639  
3.0254  
1.0228  
149.4795  
142.2040  
139.3674  
132.1799  
131.4495  
131.2537  
127.5460  
126.3133  
122.3013  
120.5269  
119.6996  
118.9040

2.0492  
1.0000  
3.0367  
3.0573  
55.0461  
48.5756  
40.8152  
40.5381  
40.2603  
40.1743  
39.9821  
39.7041  
39.4258  
39.1474  
16.3794

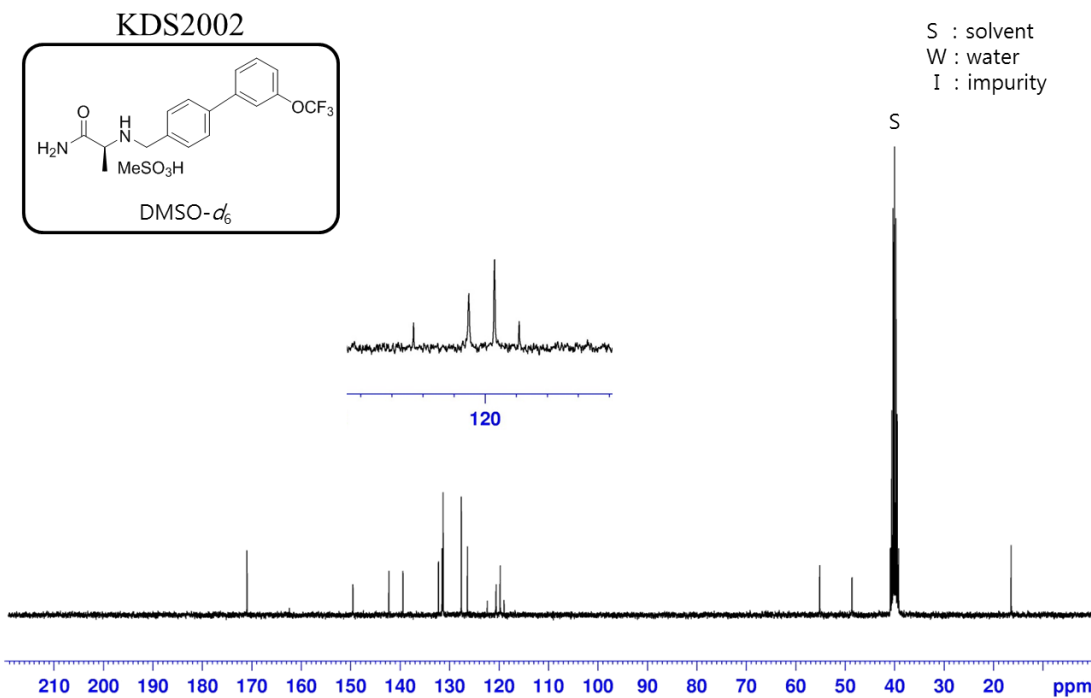

120



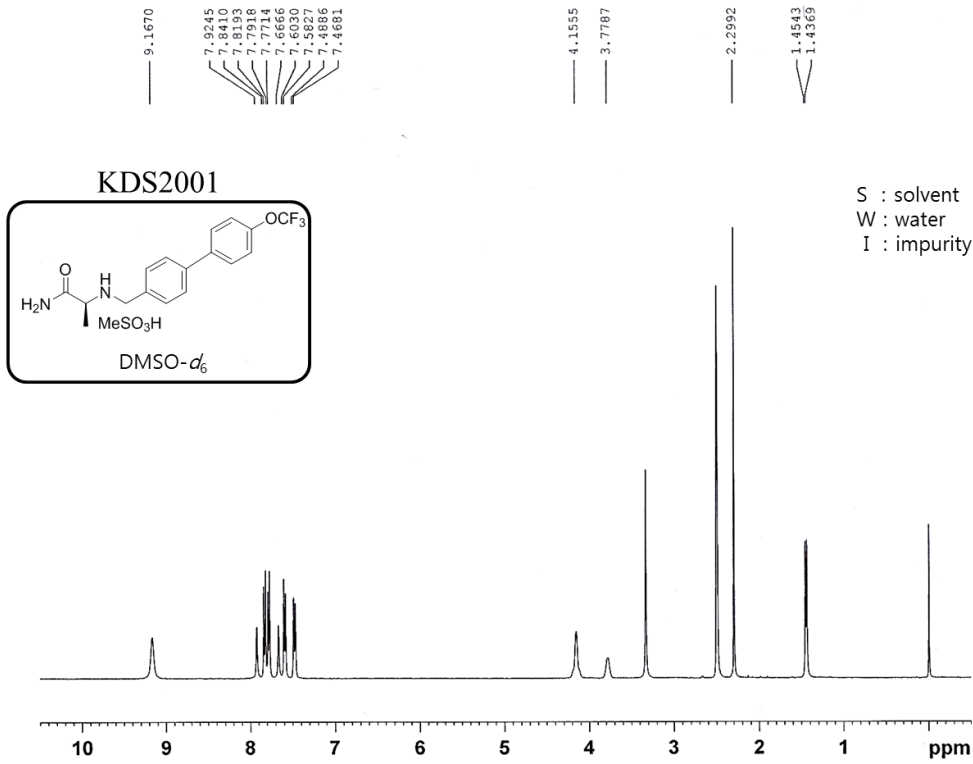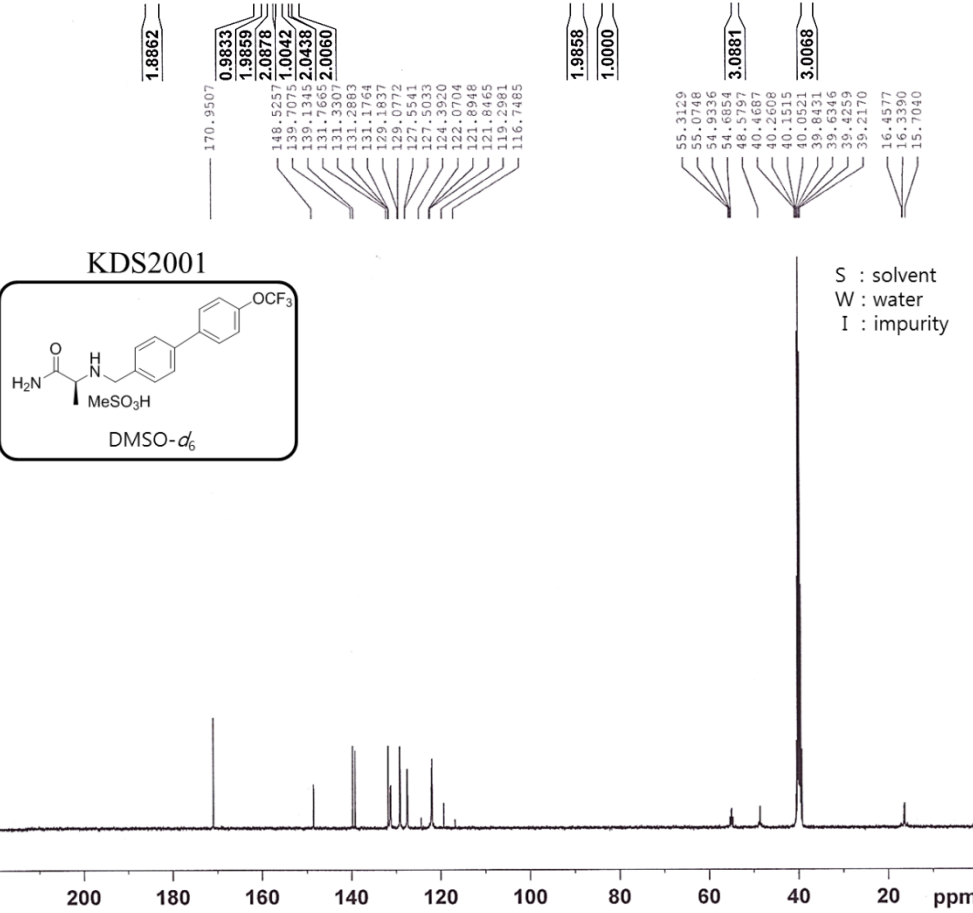

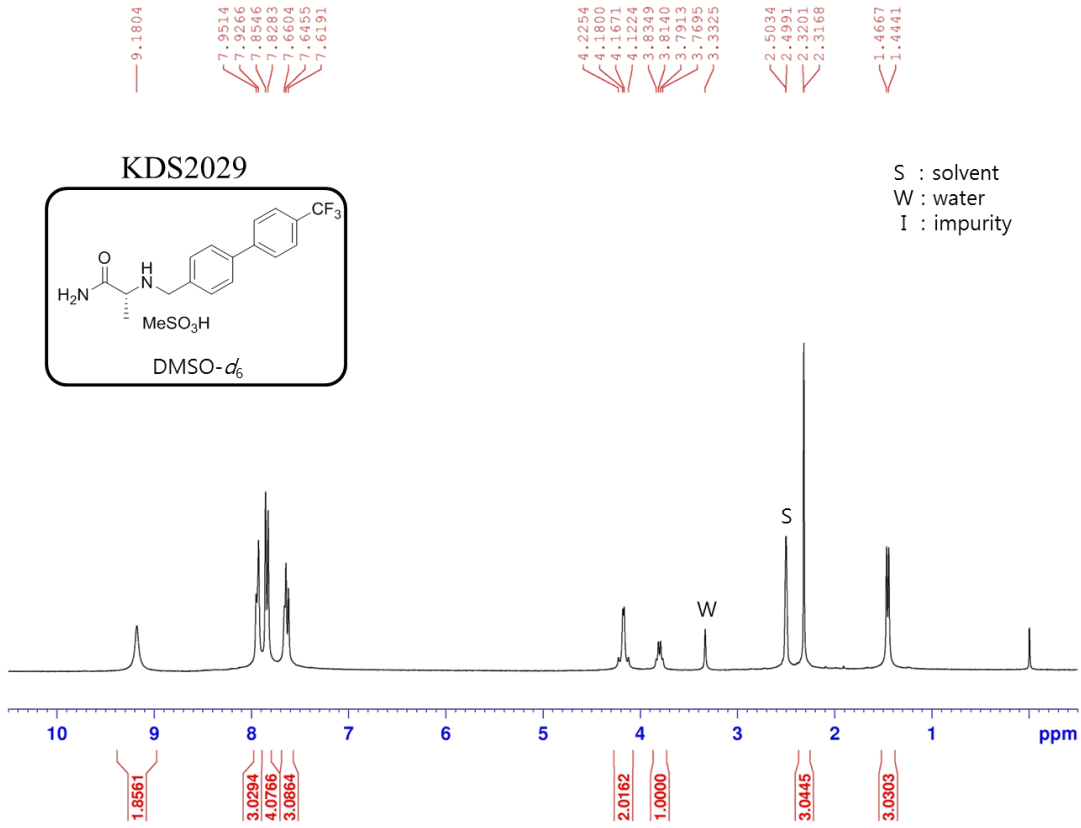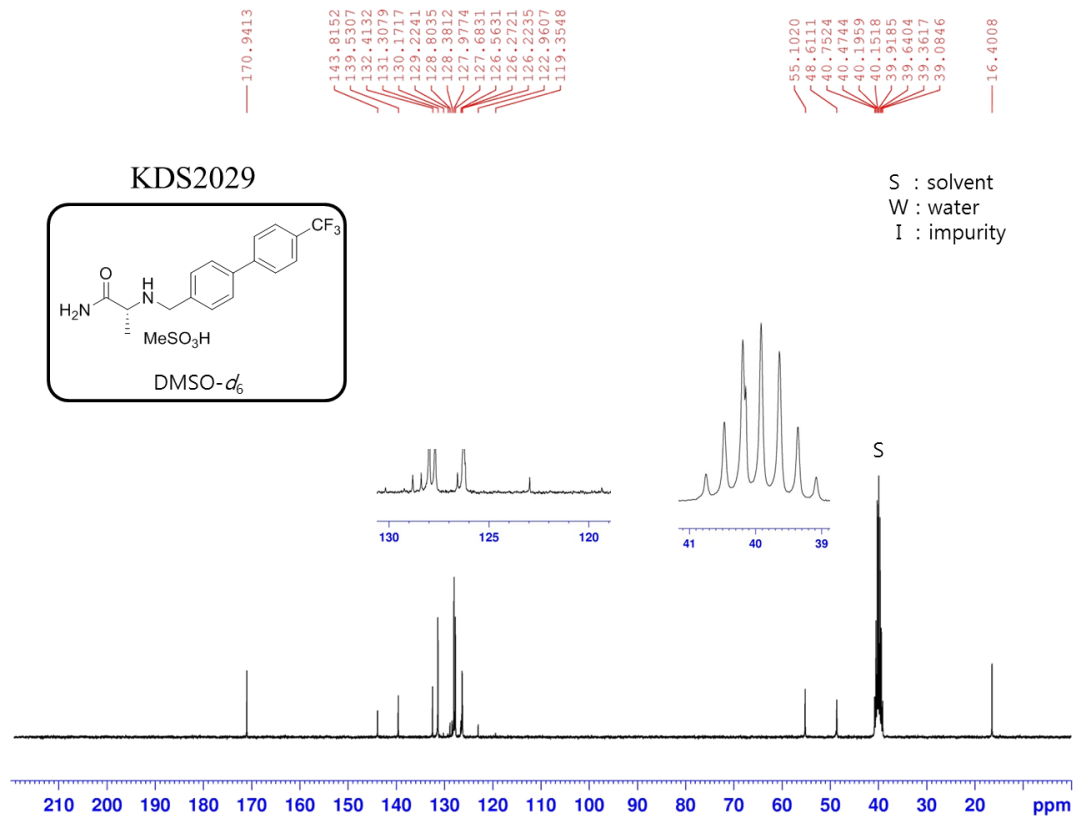

# Chiral HPLC analysis of (S)/(R)-KDS2010

## KDS2010

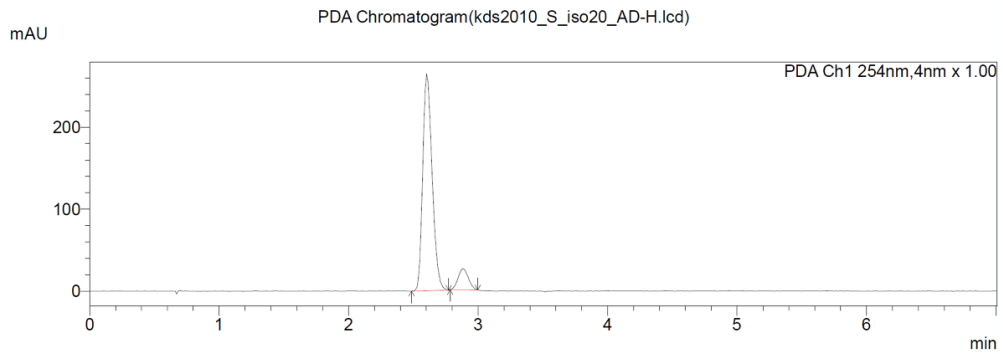

PDA Peak Table(kds2010\_S\_iso20\_AD-H.lcd)

| Peak# | Ret. Time | Area    | Height | Mark | Conc. | Unit | ID# | Name | Area%   |
|-------|-----------|---------|--------|------|-------|------|-----|------|---------|
| 1     | 2.604     | 1335242 | 264015 |      | 0.000 |      |     |      | 90.372  |
| 2     | 2.883     | 142254  | 25786  | M    | 0.000 |      |     |      | 9.628   |
| Total |           | 1477497 | 289801 |      | 0.000 |      |     |      | 100.000 |

## KDS2029 (R-isomer of KDS2010)

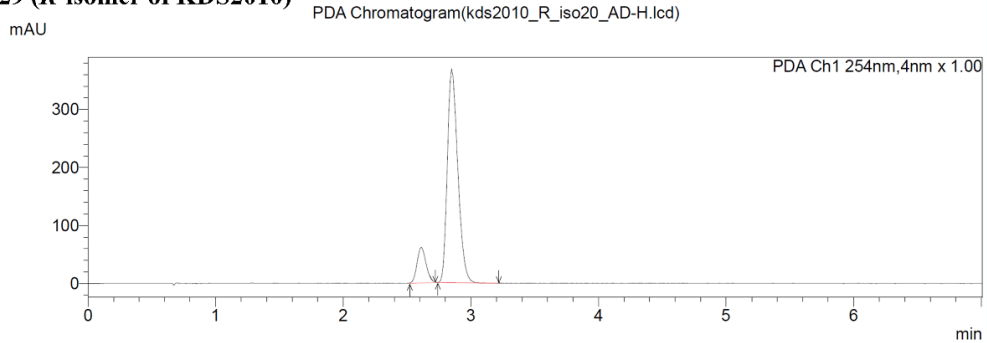

PDA Peak Table(kds2010\_R\_iso20\_AD-H.lcd)

| Peak# | Ret. Time | Area    | Height | Mark | Conc. | Unit | ID# | Name | Area%   |
|-------|-----------|---------|--------|------|-------|------|-----|------|---------|
| 1     | 2.611     | 247381  | 56152  | M    | 0.000 |      |     |      | 10.573  |
| 2     | 2.850     | 2092461 | 367978 | M    | 0.000 |      |     |      | 89.427  |
| Total |           | 2339842 | 424130 |      | 0.000 |      |     |      | 100.000 |

## KDS2010/KDS2029 = 1/1 mixture

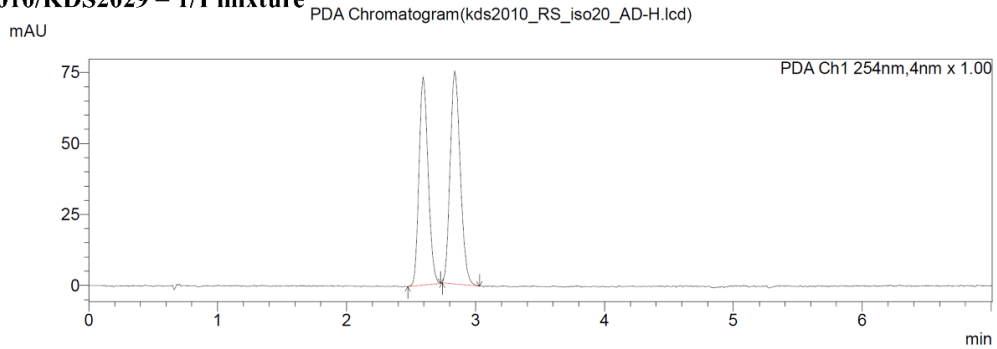

PDA Peak Table(kds2010\_RS\_iso20\_AD-H.lcd)

| Peak# | Ret. Time | Area   | Height | Mark | Conc. | Unit | ID# | Name | Area%   |
|-------|-----------|--------|--------|------|-------|------|-----|------|---------|
| 1     | 2.594     | 359576 | 73351  |      | 0.000 |      |     |      | 46.905  |
| 2     | 2.839     | 407023 | 74891  | M    | 0.000 |      |     |      | 53.095  |
| Total |           | 766599 | 148242 |      | 0.000 |      |     |      | 100.000 |

# HPLC Traces of the synthesized compounds

KDS2051

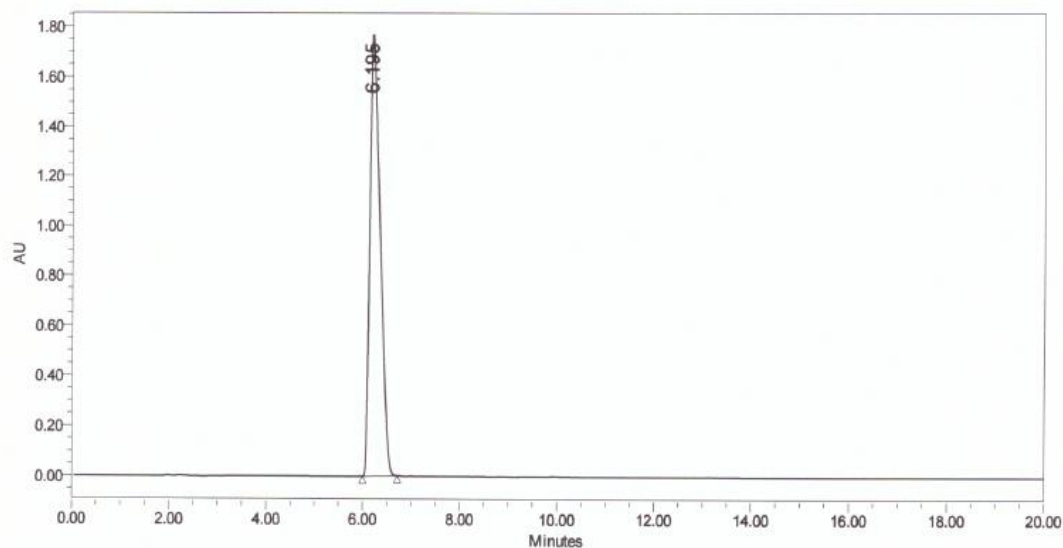

|   | RT    | Area     | % Area | Height  |
|---|-------|----------|--------|---------|
| 1 | 6.195 | 26611952 | 100.00 | 1767689 |

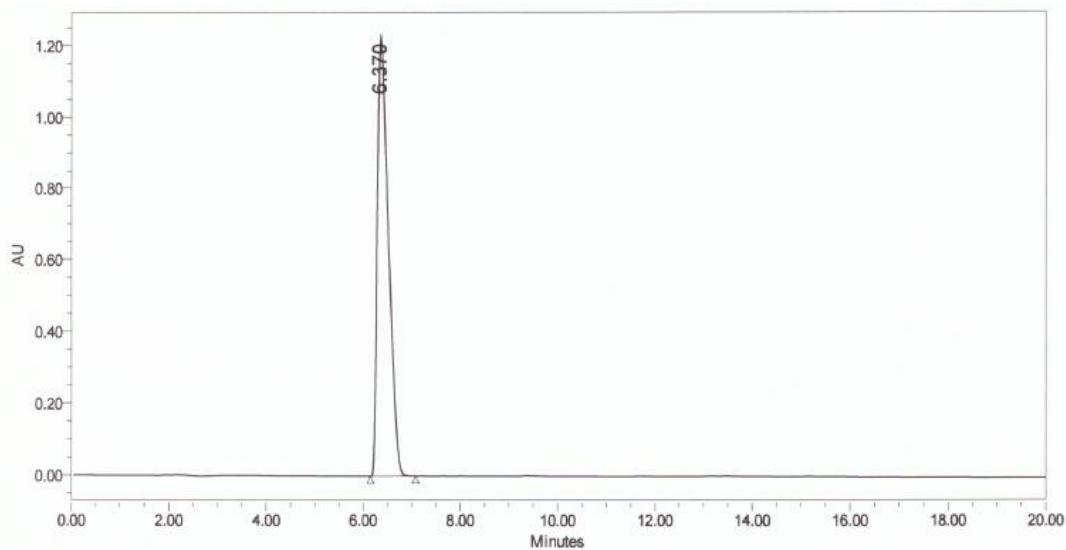

|   | RT    | Area     | % Area | Height  |
|---|-------|----------|--------|---------|
| 1 | 6.370 | 19771280 | 100.00 | 1234101 |

KDS0011

KDS0015

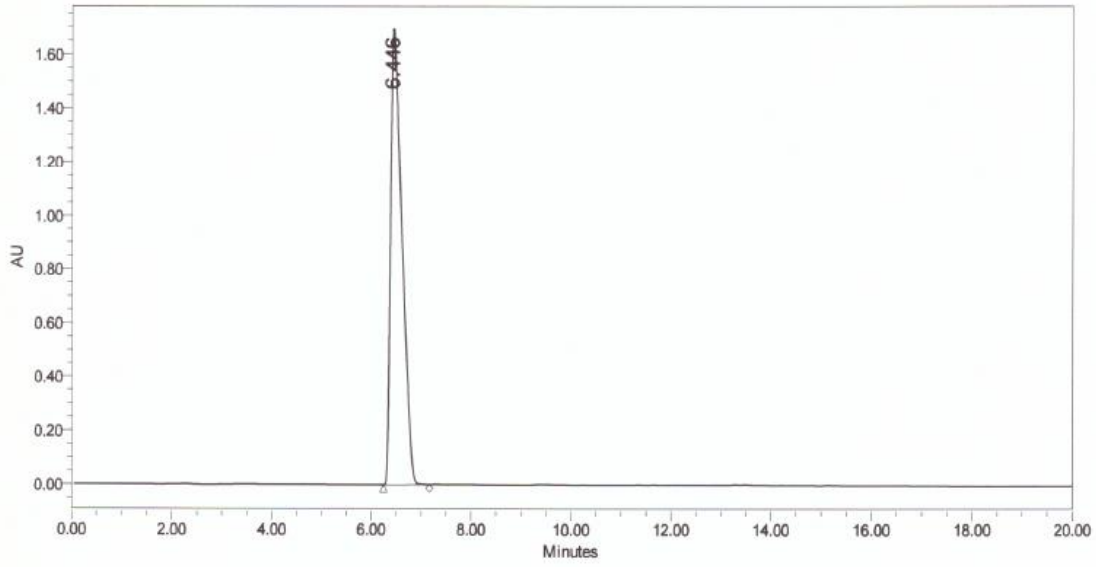

|   | RT    | Area     | % Area | Height  |
|---|-------|----------|--------|---------|
| 1 | 6.446 | 27159808 | 100.00 | 1696729 |

KDS2006

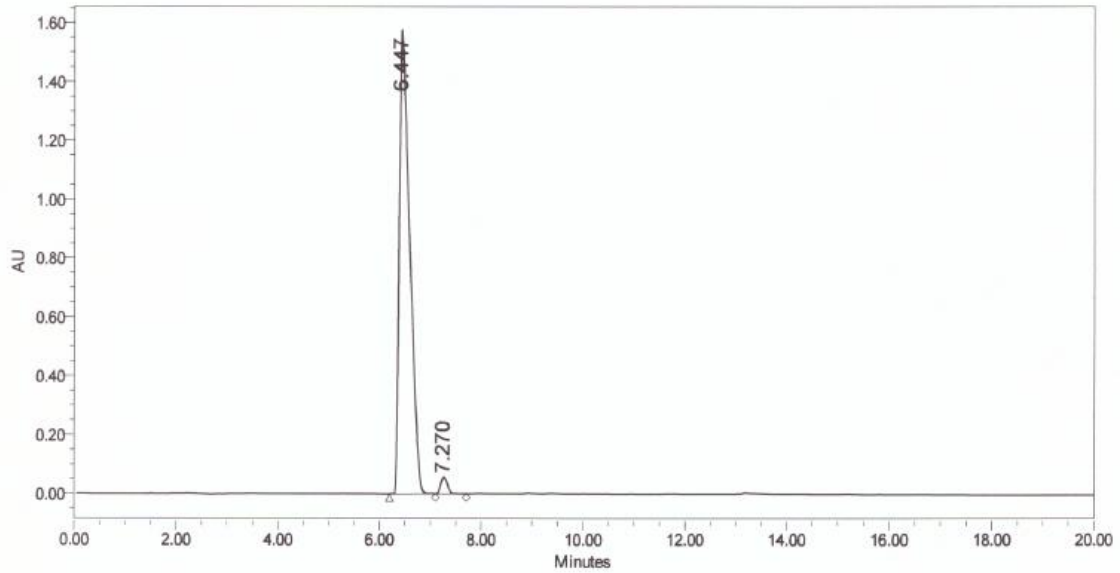

|   | RT    | Area     | % Area | Height  |
|---|-------|----------|--------|---------|
| 1 | 6.447 | 22794877 | 97.64  | 1579035 |
| 2 | 7.270 | 549803   | 2.36   | 57435   |

KDS2042

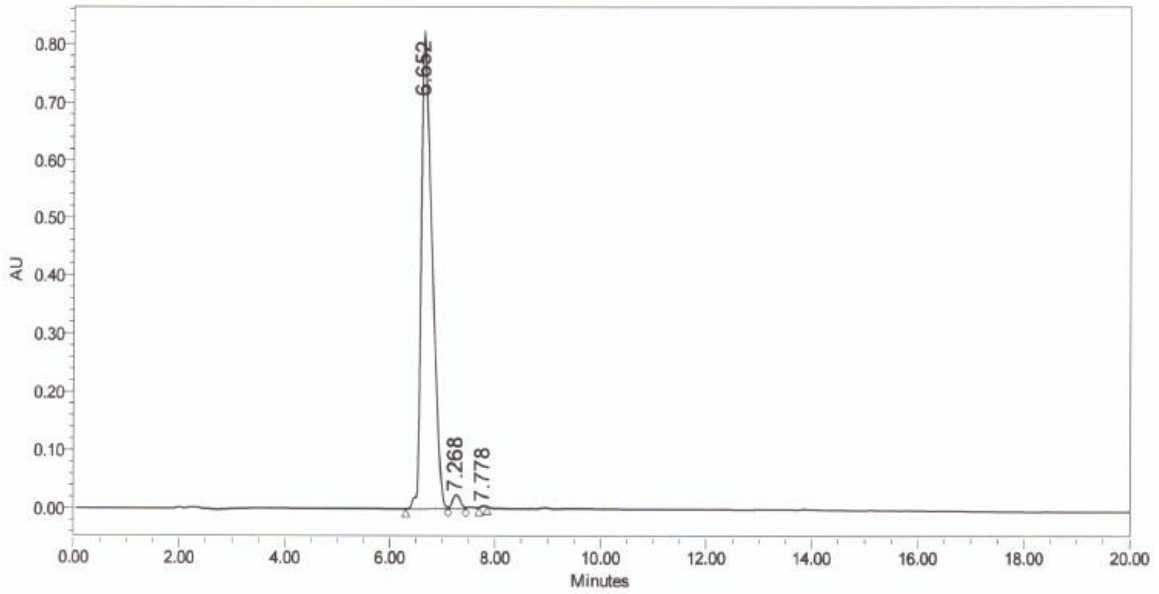

|   | RT    | Area     | % Area | Height |
|---|-------|----------|--------|--------|
| 1 | 6.652 | 11925173 | 97.84  | 823295 |
| 2 | 7.268 | 249195   | 2.04   | 23315  |
| 3 | 7.778 | 14041    | 0.12   | 2524   |

KDS0014

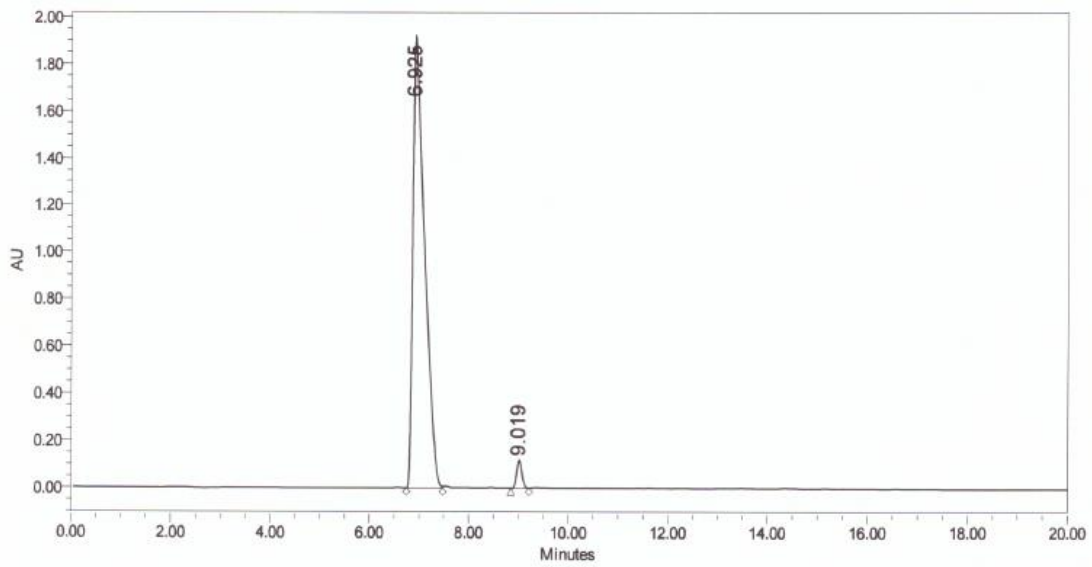

|   | RT    | Area     | % Area | Height  |
|---|-------|----------|--------|---------|
| 1 | 6.925 | 31881871 | 97.30  | 1936560 |
| 2 | 9.019 | 883771   | 2.70   | 120329  |

KDS2005

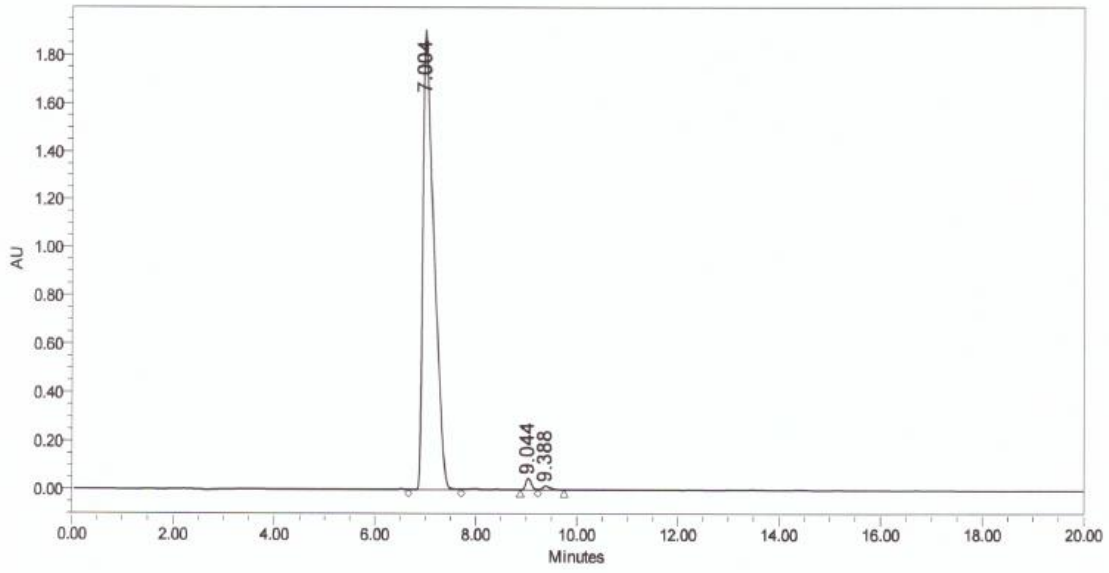

|   | RT    | Area     | % Area | Height  |
|---|-------|----------|--------|---------|
| 1 | 7.004 | 29361216 | 98.23  | 1904414 |
| 2 | 9.044 | 376171   | 1.26   | 48058   |
| 3 | 9.388 | 154312   | 0.52   | 15967   |

KDS2041

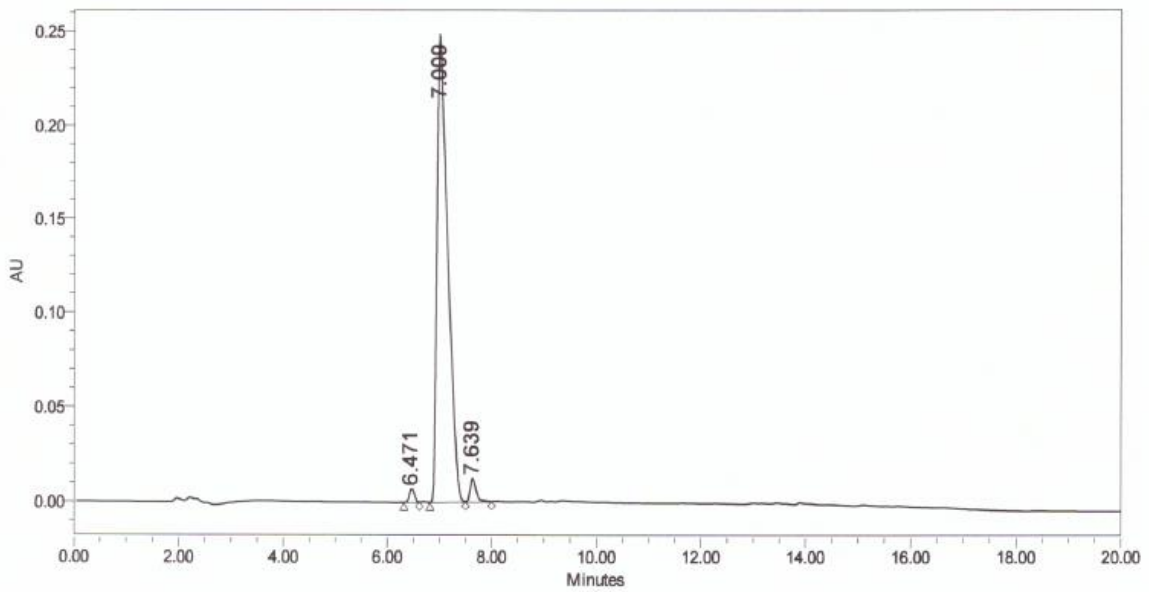

|   | RT    | Area    | % Area | Height |
|---|-------|---------|--------|--------|
| 1 | 6.471 | 52462   | 1.37   | 7270   |
| 2 | 7.009 | 3673357 | 95.77  | 250417 |
| 3 | 7.639 | 109735  | 2.86   | 12586  |

KDS0012

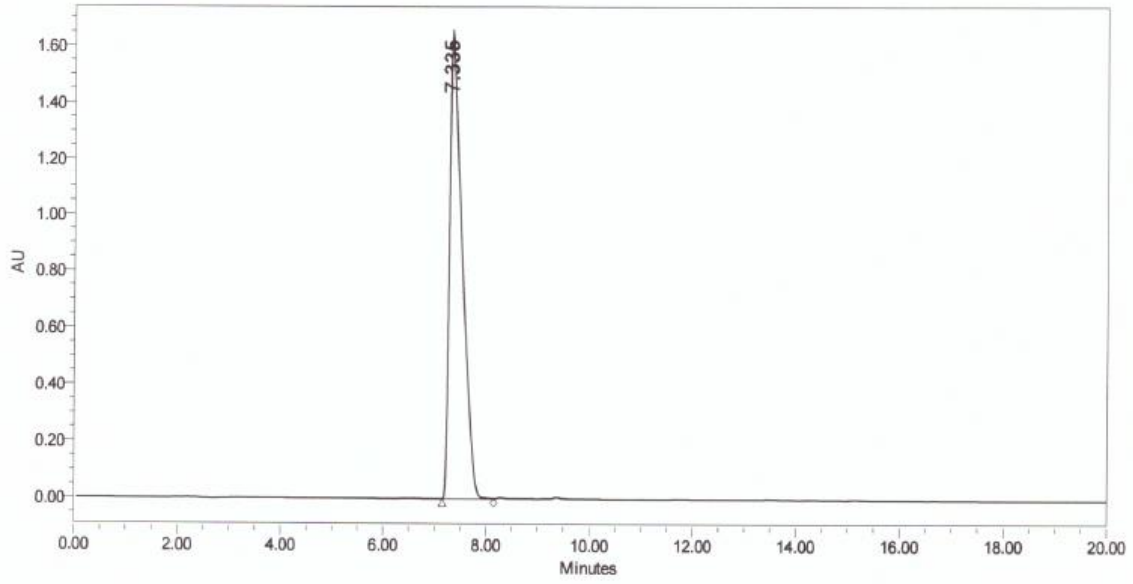

|   | RT    | Area     | % Area | Height  |
|---|-------|----------|--------|---------|
| 1 | 7.335 | 28492724 | 100.00 | 1658366 |

KDS2010

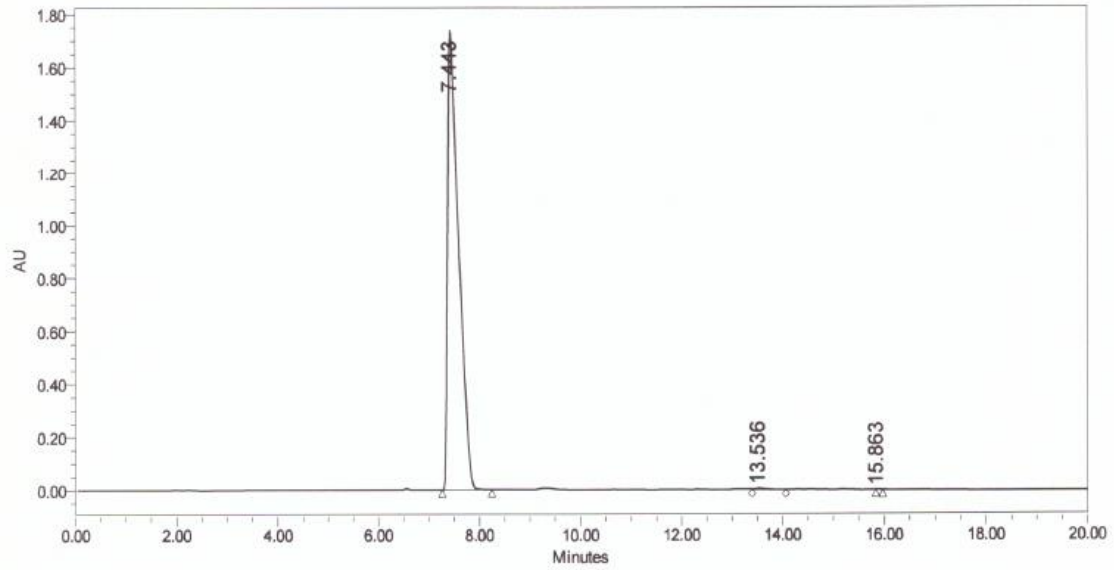

|   | RT     | Area     | % Area | Height  |
|---|--------|----------|--------|---------|
| 1 | 7.443  | 26628094 | 99.67  | 1752481 |
| 2 | 13.536 | 87208    | 0.33   | 5491    |
| 3 | 15.863 | 1497     | 0.01   | 354     |



KDS2002

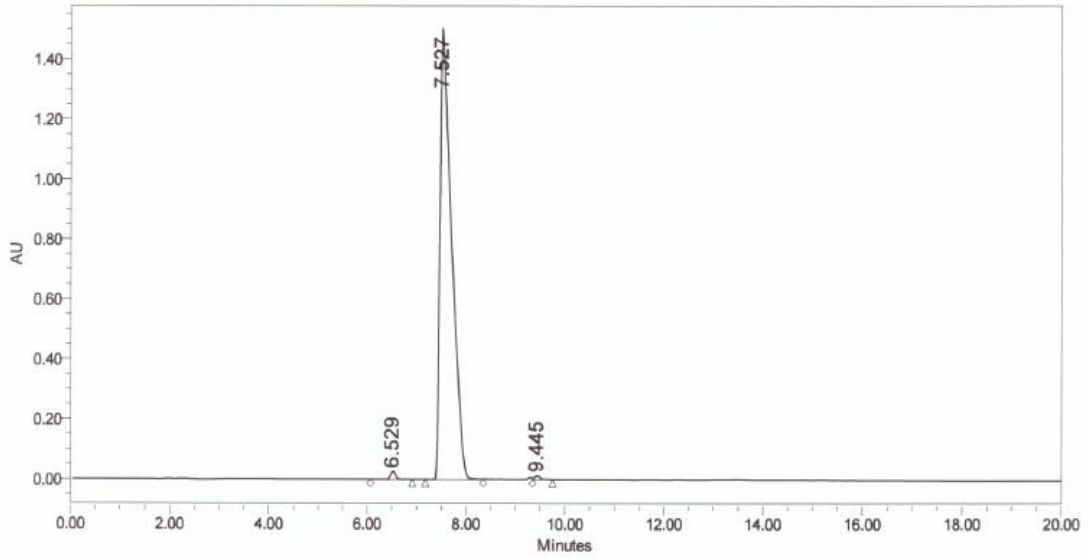

|   | RT    | Area     | % Area | Height  |
|---|-------|----------|--------|---------|
| 1 | 6.529 | 203982   | 0.80   | 26899   |
| 2 | 7.527 | 25272367 | 98.80  | 1518799 |
| 3 | 9.445 | 103765   | 0.41   | 12471   |

KDS2001

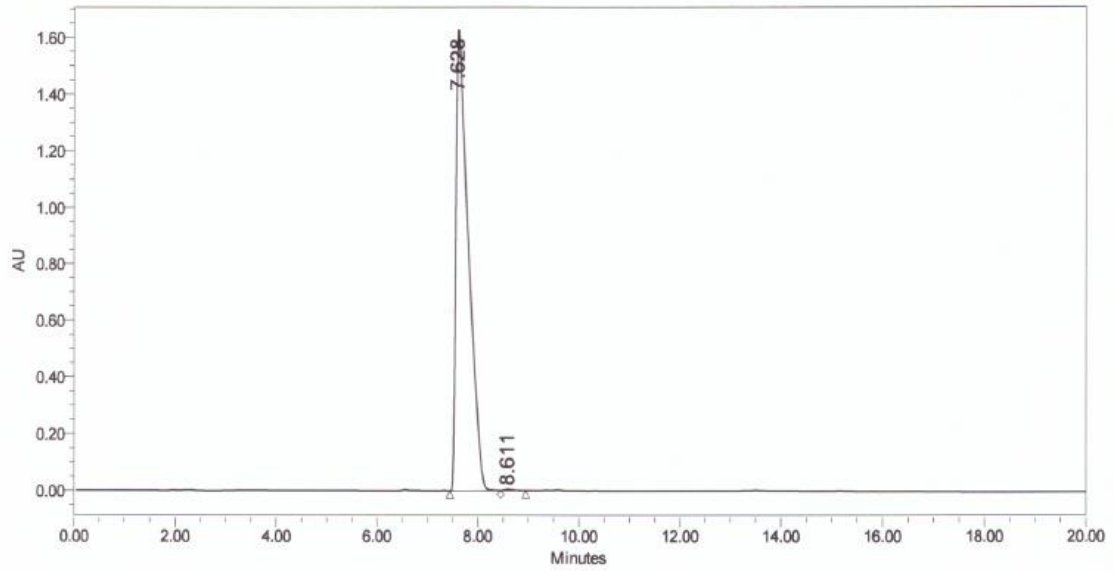

|   | RT    | Area     | % Area | Height  |
|---|-------|----------|--------|---------|
| 1 | 7.628 | 28245195 | 99.78  | 1645625 |
| 2 | 8.611 | 63682    | 0.22   | 4767    |

KDS2029

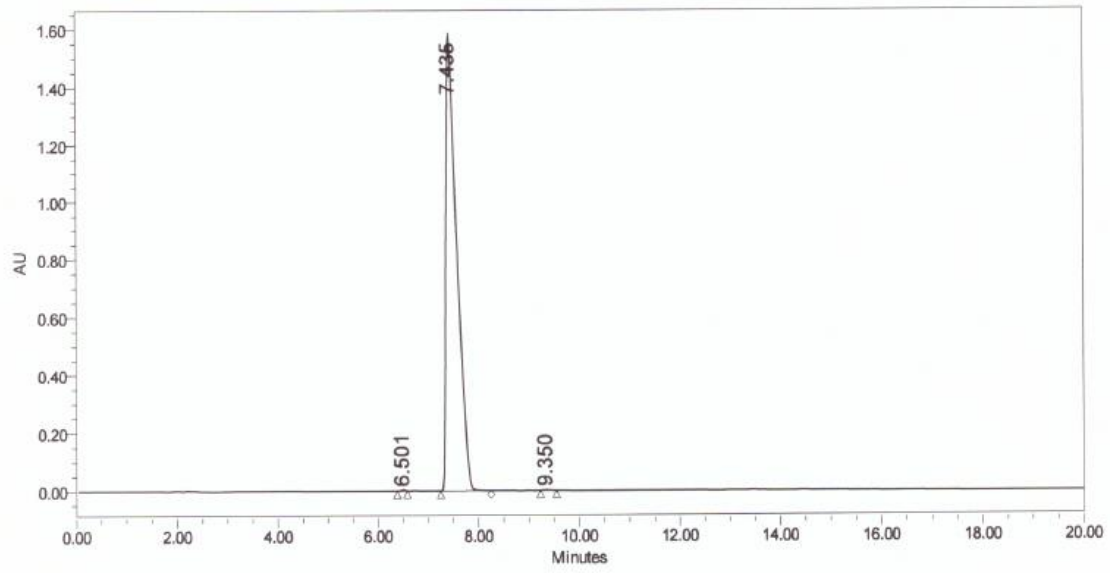

|   | RT    | Area     | % Area | Height  |
|---|-------|----------|--------|---------|
| 1 | 6.501 | 20639    | 0.09   | 3682    |
| 2 | 7.435 | 23930034 | 99.84  | 1587440 |
| 3 | 9.350 | 18797    | 0.08   | 1737    |

# HR-MS spectra

## KDS2051

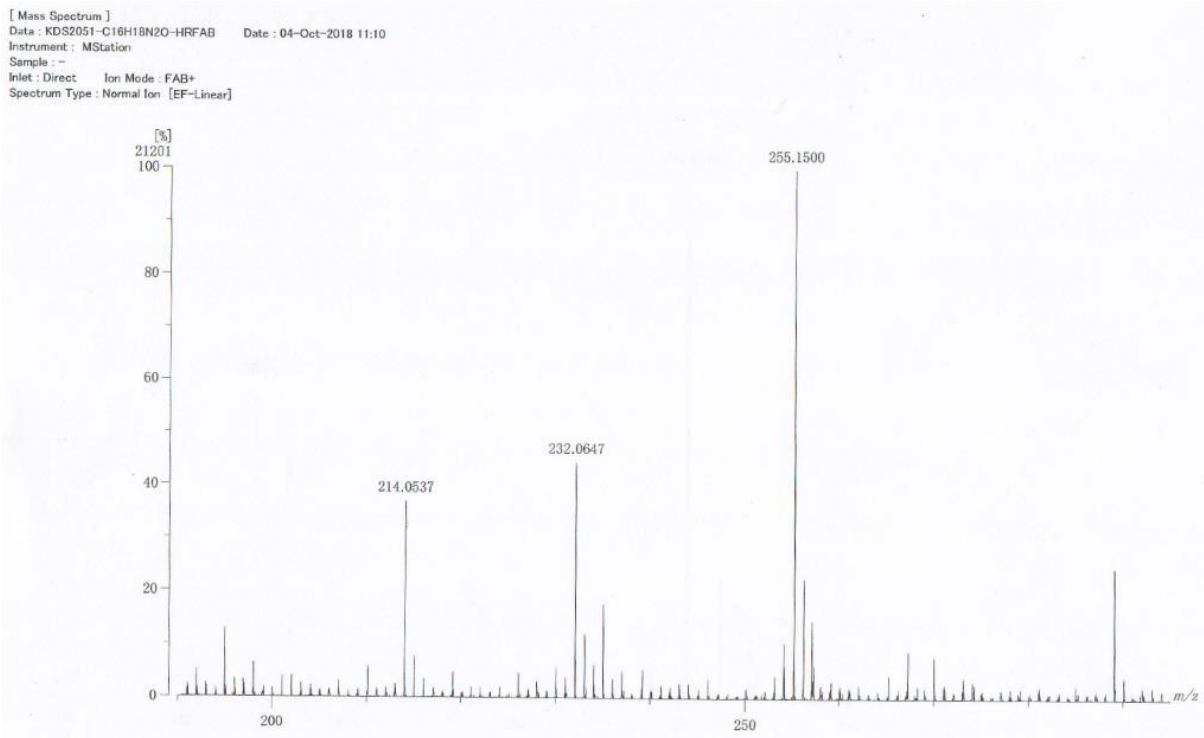

## KDS0011

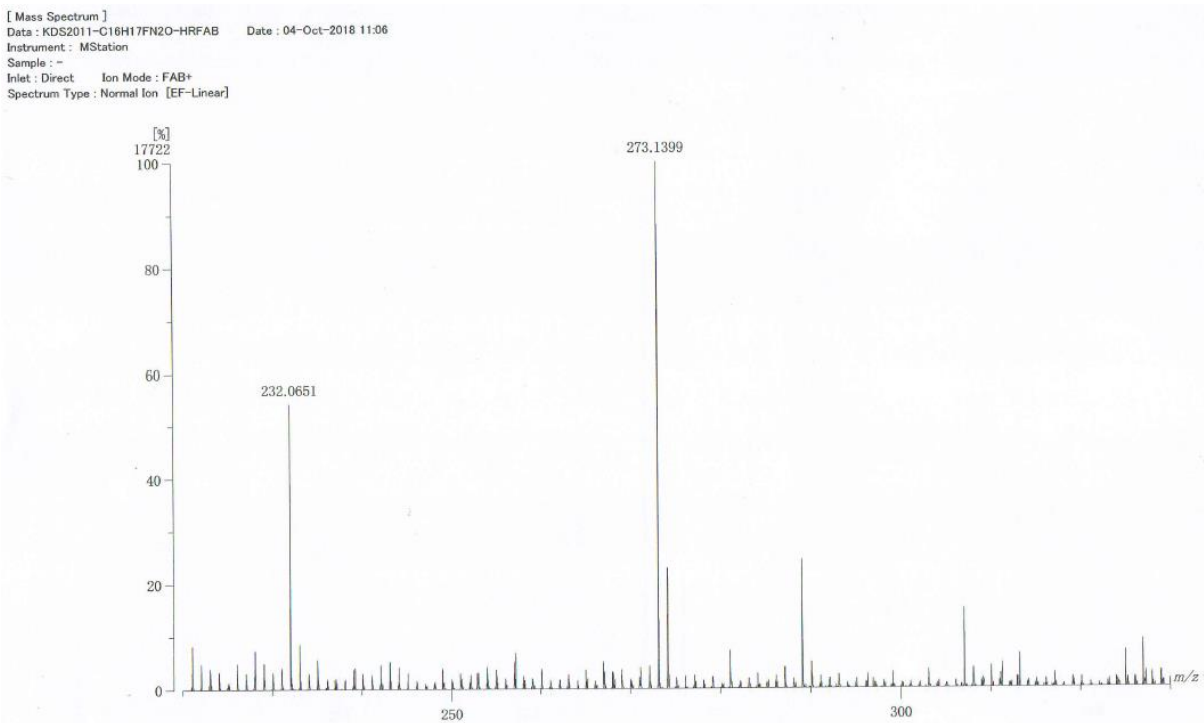

# KDS0015

[ Mass Spectrum ]  
Data : KDS2015-C16H17FN2O-HRFAB Date : 04-Oct-2018 11:01  
Instrument : MStation  
Sample : -  
Inlet : Direct Ion Mode : FAB+  
Spectrum Type : Normal Ion [EF-Linear]

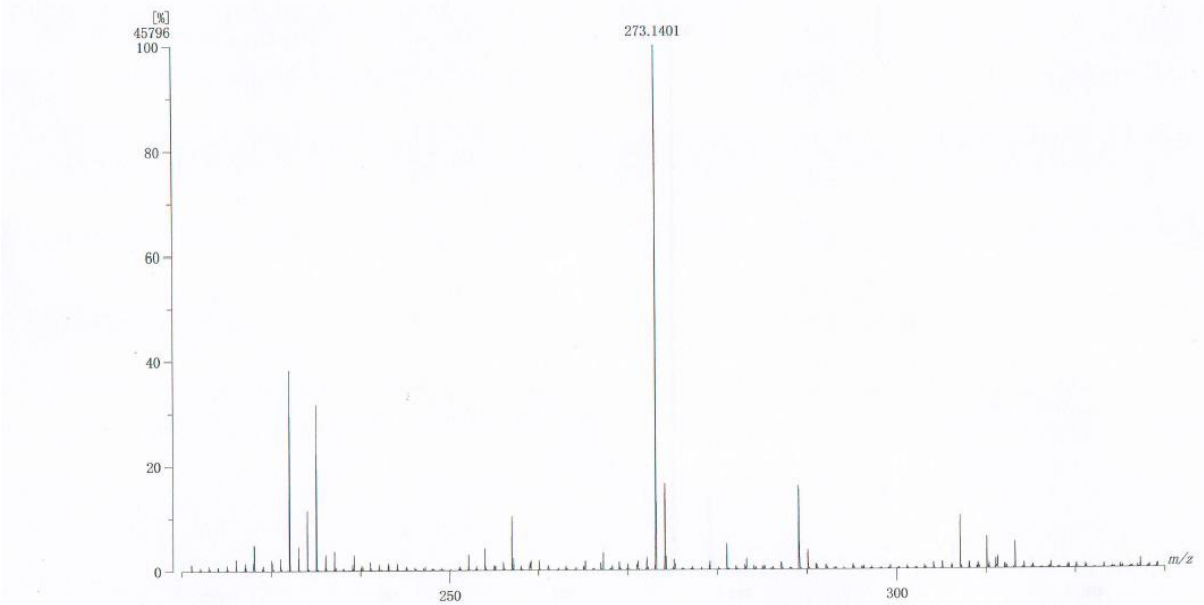

# KDS2006

[ Mass Spectrum ]  
Data : KDS2006-C16H17FN2O-HRFAB Date : 04-Oct-2018 10:55  
Instrument : MStation  
Sample : -  
Inlet : Direct Ion Mode : FAB+  
Spectrum Type : Normal Ion [EF-Linear]

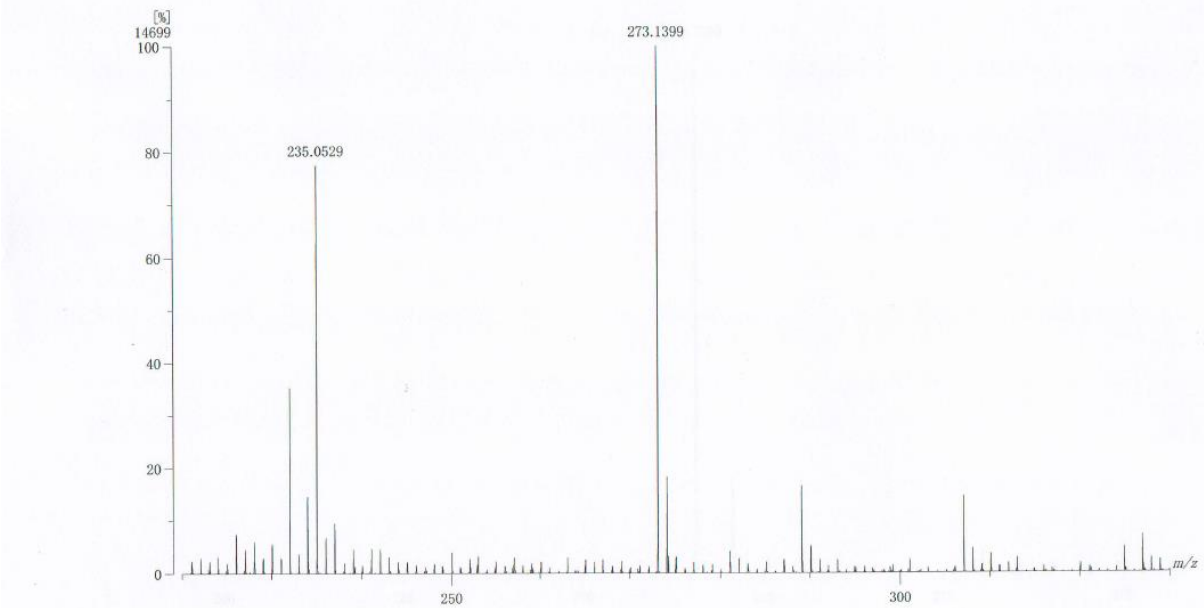



# KDS2005

[ Mass Spectrum ]  
Data : KDS2005-C16H17CIN2O-HRFAB Date : 04-Oct-2018 10:37  
Instrument : MStation  
Sample : -  
Inlet : Direct Ion Mode : FAB+  
Spectrum Type : Normal Ion [EF-Linear]

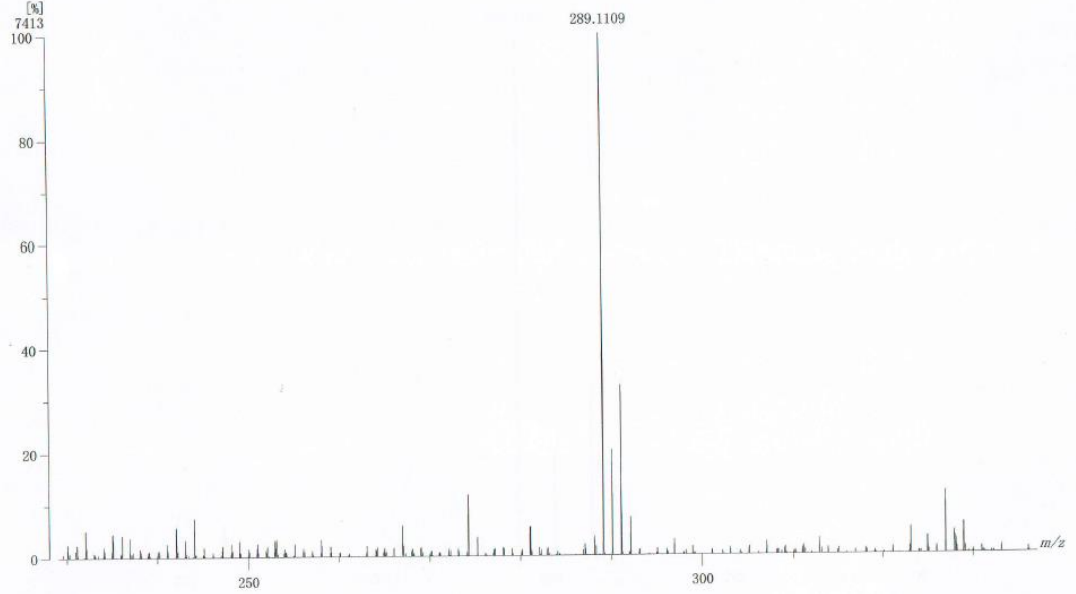

# KDS2041

[ Mass Spectrum ]  
Data : KDS2041-C17H17F3N2O-HRFAB Date : 04-Oct-2018 10:26  
Instrument : MStation  
Sample : -  
Inlet : Direct Ion Mode : FAB+  
Spectrum Type : Normal Ion [EF-Linear]

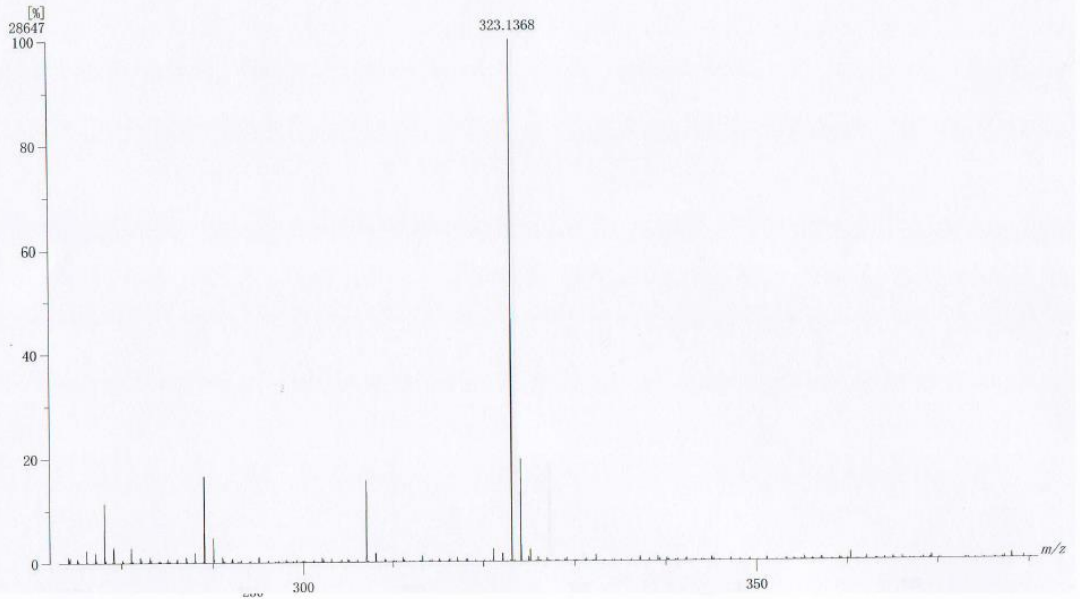

KDS0012

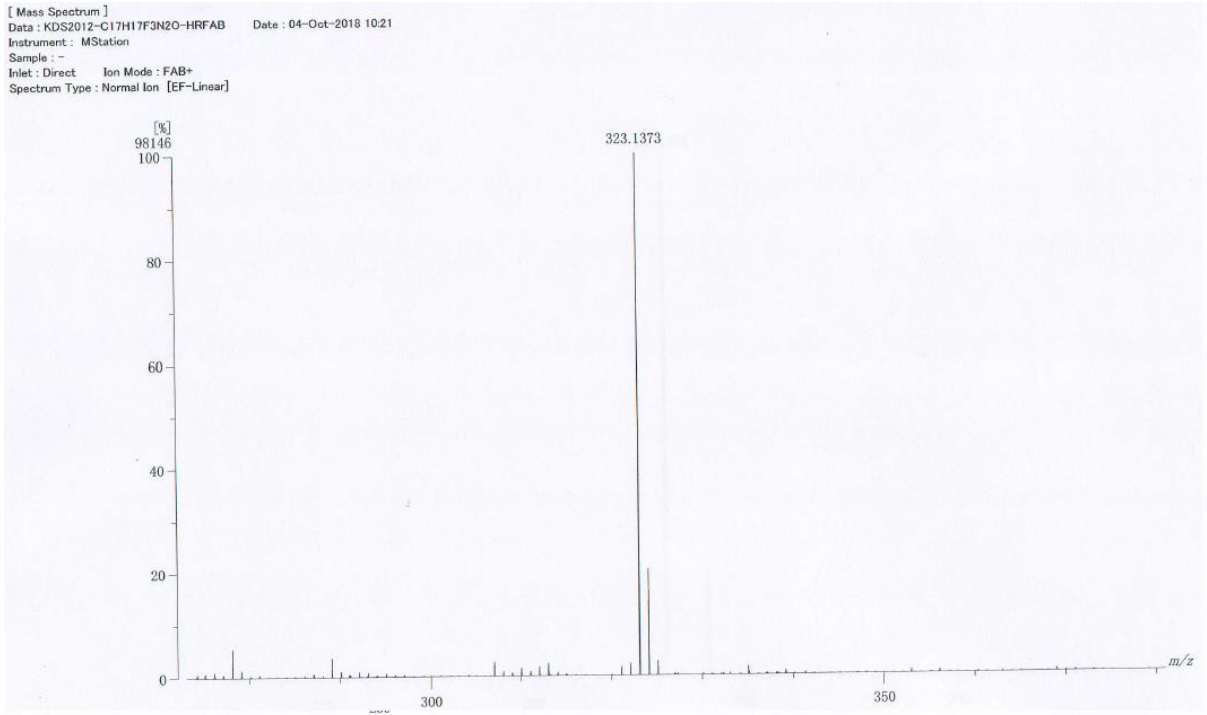

KDS2010

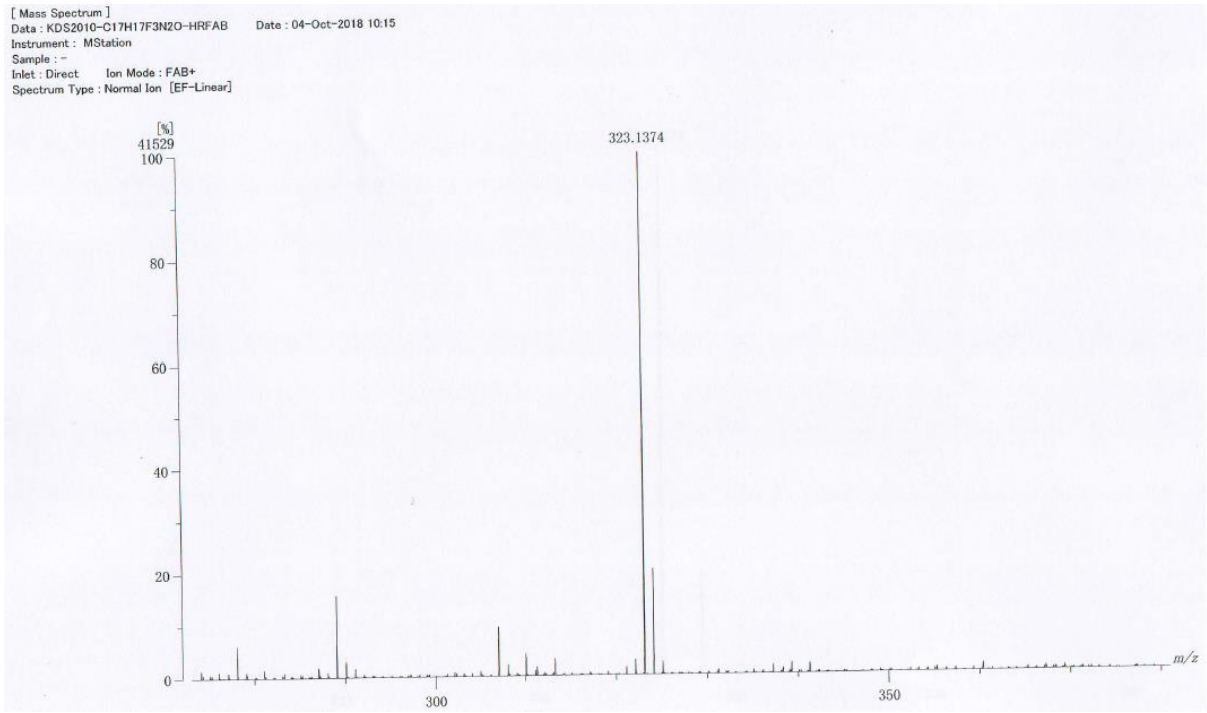

# KDS2002

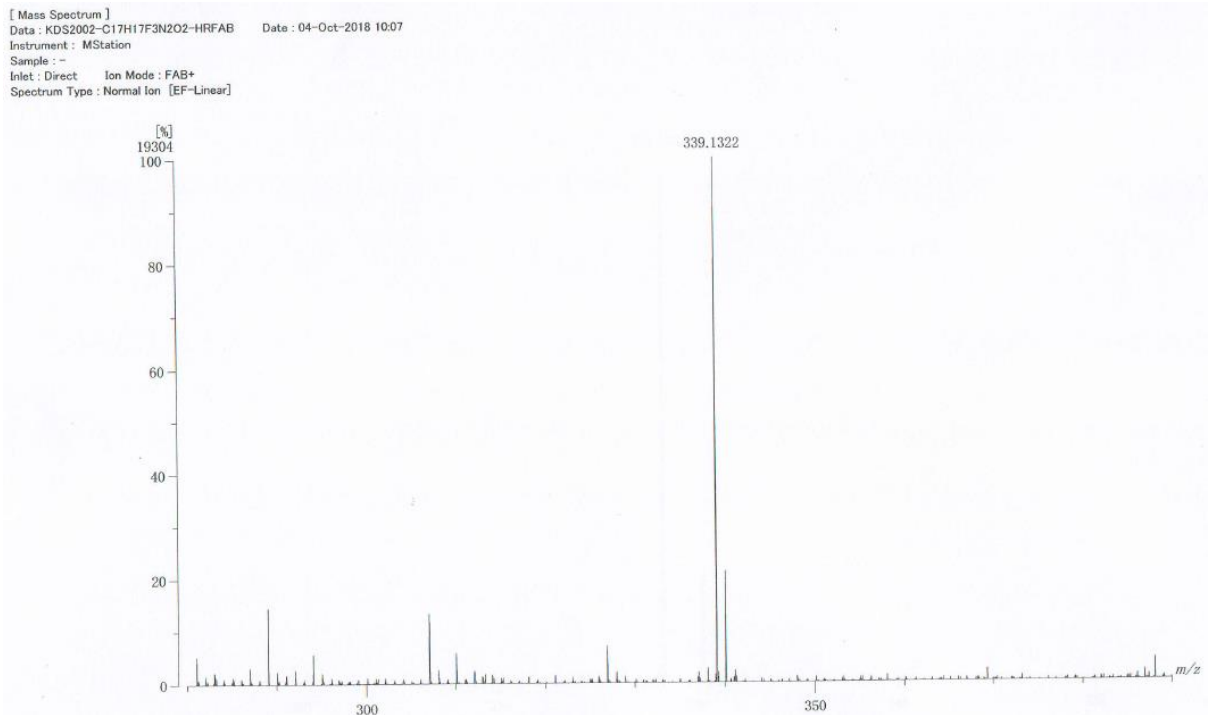

# KDS2001

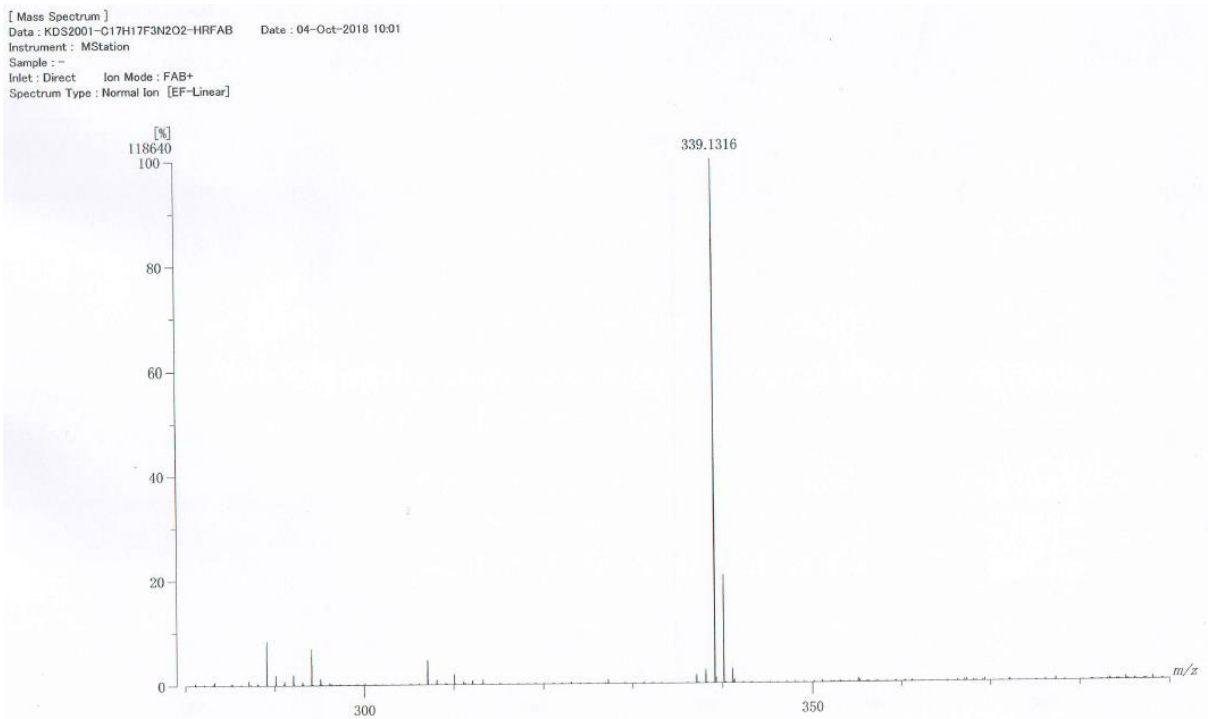



KDS2029

[ Mass Spectrum ]  
Data : KDS2029-C17H17F3N2O-HRFAB Date : 04-Oct-2018 09:54  
Instrument : MStation  
Sample : -  
Inlet : Direct Ion Mode : FAB+  
Spectrum Type : Normal Ion [EF-Linear]

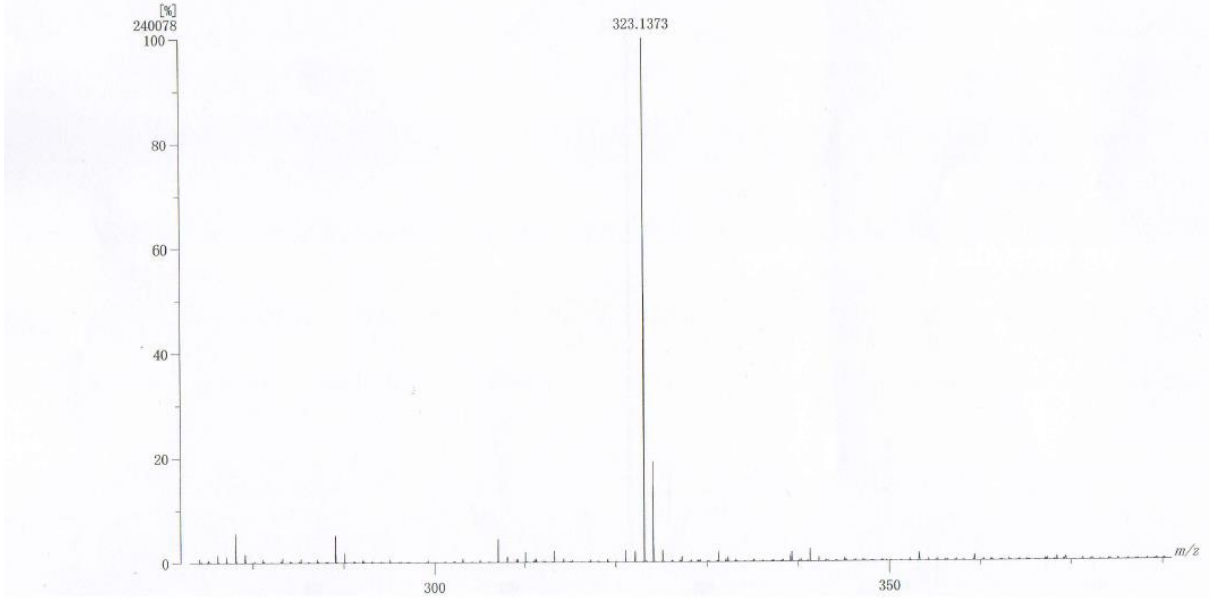

Supplement: aav0316_SM.pdf [file aav0316_SM.pdf]
